# Supplementary material for: Impact of Manganese, Copper and Zinc Ions on the Transcriptome of the Nosocomial Pathogen Enterococcus faecalis V583
Source: PLoS One. 2011 Oct 28;6(10):e26519. doi: 10.1371/journal.pone.0026519 (PMC3203883; doi:10.1371/journal.pone.0026519)
Supplement: Table S1 — Gene expression data of E. faecalis V583 grown to mid-exponential phase in the presence of 4 mM ZnSO4, 0.4 mM MnSO4 or 0.05 mM CuSO4, relative to that during growth in GM17. Significantly differentially expressed genes, in bold, have a p value≤0.0001 and a ratio≥|1.5|. “NA” denotes non-expressed or excluded genes. (XLS) [file pone.0026519.s003.xls]

## Sheet: confidence value=9
		Zn			Mn			Cu
Gene	Putative function	fold	Bayes,p		fold	Bayes, p		fold	Bayes, p
EF0001	chromosomal replication initiator protein DnaA	1.03404	0.691884		-1.05334	0.278743		-1.11169	0.0205241
EF0002	DNA polymerase III, beta subunit	-1.08711	0.307717		-1.04618	0.389621		-1.1918	0.0141393
EF0003	conserved hypothetical protein	1.1806	0.0395339		1.22892	0.00901076		-1.02088	0.646864
EF0004	DNA replication and repair protein RecF	1.06967	0.409613		1.11783	0.0546292		1.01002	0.843236
EF0005	DNA gyrase, B subunit	-1.06161	0.46655		1.02069	0.6609		-1.13444	0.00515326
EF0006	DNA gyrase, A subunit	-1.06781	0.228835		1.05181	0.327113		-1.30598	0.000403336
EF0007	ribosomal protein S6	-1.31914	0.00378528		1.05901	0.427288		1.00438	0.939873
EF0008	single-strand binding protein	-1.28918	0.026151		1.14596	0.056607		-1.03385	0.464213
EF0009	ribosomal protein S18	-1.51449	3.889e-05		1.1307	0.330718		1.03681	0.605537
EF0011	DHH family protein	-1.05844	0.289444		-1.02826	0.626469		-1.1272	0.0181021
EF0012	ribosomal protein L9	1.07012	0.257581		1.04005	0.417694		-1.00521	0.897779
EF0013	replicative DNA helicase	1.03243	0.70727		1.07587	0.23923		1.05712	0.332541
EF0014	adenylosuccinate synthetase	-1.25751	0.00214451		1.05223	0.524472		1.10454	0.0382003
EF0016	DegV family protein	-1.10244	0.198413		-1.0298	0.703743		-1.11503	0.0379493
EF0017	ABC transporter, ATP-binding protein	-1.04708	0.648818		1.0617	0.396884		1.03436	0.464953
EF0018	sigma-54 interaction domain protein	1.37854	0.000683751		1.02235	0.739055		-1.03479	0.485034
EF0019	PTS system, mannose-specific IIB component	1.29083	0.000721236		1.06619	0.229077		-1.02691	0.589466
EF0020	PTS system, mannose-specific IIAB components	1.1723	0.0110412		1.00793	0.903079		-1.07411	0.153394
EF0021	PTS system, mannose-specific IIC component	1.07607	0.202967		1.0717	0.17682		-1.00737	0.913807
EF0022	PTS system, mannose-specific IID component	1.07212	0.207854		1.0182	0.768677		1.26409	0.000125505
EF0024	conserved hypothetical protein	-1.03622	0.585044		1.12898	0.117596		-1.09921	0.0235042
EF0025	membrane protein, putative	-1.29578	0.000603576		-1.30846	0.0156586		1.19317	0.00805257
EF0026	conserved hypothetical protein	1.54026	0.000519193		1.12831	0.159969		2.34642	0.000749606
EF0027	phosphosugar-binding transcriptional regulator, putative	1.88621	0.0230082		-1.05783	0.64324		-1.40943	NA
EF0028	PTS system, IIBC components	1.21706	NA		1.07519	0.576379		1.00448	0.96677
EF0029	aminotransferase, class II	-1.05182	NA		-1.20768	NA		2.02793	NA
EF0030	endoribonuclease L-PSP, putative	1.01949	0.870691		-1.06723	0.460303		-1.08305	0.0952328
EF0031	membrane protein, putative	1.03338	0.638721		-1.07742	0.425064		1.20646	0.00689818
EF0032	membrane protein, putative	1.0694	0.410145		-1.08811	0.180961		1.13404	0.0276031
EF0033	hypothetical protein	-1.19376	NA		-1.0566	NA		-1.13846	NA
EF0034	conserved hypothetical protein	1.1024	NA		-1.12083	0.142397		1.03005	0.73545
EF0035	conserved hypothetical protein	1.15245	0.320724		-1.14519	0.0668666		-1.01932	NA
EF0036	conserved hypothetical protein	1.2203	0.0459528		-1.03753	0.688624		-1.04897	0.576641
EF0037	gamma-glutamyl phosphate reductase	-1.05271	0.427701		-1.00471	0.928428		-1.03799	0.425703
EF0038	glutamate 5-kinase	1.1814	0.055511		-1.00859	0.862632		-1.10941	0.0381421
EF0039	deoxyuridine 5`-triphosphate nucleotidohydrolase, putative	1.14578	0.039838		1.04446	0.458234		-1.00998	0.796435
EF0040	DNA repair protein RadA	1.10421	0.0774312		-1.05488	0.204717		-1.18229	0.000317162
EF0041	PIN domain protein	1.01352	0.822963		-1.06316	0.176847		1.03497	0.4594
EF0042	2C-methyl-D-erythritol 2,4-cyclodiphosphate synthase	1.13191	0.101813		1.01579	0.768492		-1.08482	0.0680613
EF0043	glutamyl-tRNA synthetase	-1.01193	0.912826		-1.11487	0.0396978		-1.0341	0.444579
EF0044	serine O-acetyltransferase	-1.20664	0.00587473		1.21625	0.124878		-1.28296	0.000221219
EF0045	cysteinyl-tRNA synthetase	-1.40901	0.0260648		1.01014	0.903022		-1.33151	5.49861e-06
EF0046	conserved hypothetical protein	-1.26926	0.000291891		1.06451	0.445073		-1.30112	8.80188e-06
EF0047	RNA methyltransferase, TrmH family	-1.20736	0.0034463		1.06762	0.420374		-1.27954	2.02323e-05
EF0048	conserved hypothetical protein	-1.24039	0.00163321		1.10072	0.203295		1.00194	0.968512
EF0049	sigma-70 factor family protien	1.23369	NA		-1.01386	0.90708		-1.06889	NA
EF0050	conserved hypothetical protein	1.14897	0.156634		1.21603	0.00216452		1.15356	0.165194
EF0051	4-diphosphocytidyl-2C-methyl-D-erythritol kinase	1.37195	0.0104741		1.21746	0.00486449		1.3109	0.00028331
EF0052	hypothetical protein	1.07266	0.439401		1.12023	0.174512		1.13498	0.144042
EF0053	DNA polymerase III, epsilon subunit	1.13472	0.0588203		-1.01703	0.771749		-1.02362	0.63434
EF0054	hypothetical protein	1.43886	0.00350286		1.03091	0.778813		-1.44904	4.47324e-06
EF0055	adhesion lipoprotein	-3.83618	1.11944e-11		-1.05982	0.322713		-1.21198	0.00326587
EF0056	ABC transporter, ATP-binding protein	-3.41081	3.04869e-11		-1.07738	0.288898		-1.20834	0.0117775
EF0057	ABC transporter, permease protein	-2.41916	1.20924e-05		1.01704	0.753091		-1.20992	0.00990647
EF0058	pur operon repressor PurR	-1.06015	0.447609		1.08652	0.124289		1.06394	0.119728
EF0059	UDP-N-acetylglucosamine pyrophosphorylase	-1.01504	0.77907		1.04528	0.371844		1.08849	0.047024
EF0062	5-nucleotidase family protein	1.43296	3.38673e-05		1.29404	0.000442694		1.20805	0.00241848
EF0063	pheromone binding protein, putative	-1.44929	0.0175128		1.00622	0.935747		-1.51651	0.00039261
EF0064	conserved hypothetical protein	-1.12313	NA		-1.10693	NA		1.23975	NA
EF0065	bacterial luciferase family protein	1.32972	NA		-1.06773	NA		-1.25469	NA
EF0066	Holliday junction DNA helicase RuvA	-1.02503	0.735563		1.23606	0.00371248		1.0057	0.93301
EF0067	Holliday junction DNA helicase RuvB	-1.20112	0.0316781		1.06674	0.145436		-1.29712	7.85e-06
EF0068	hypothetical protein	-1.29829	NA		1.14211	0.459858		1.07616	NA
EF0069	N-acetylmannosamine-6-phosphate epimerase, putative	-1.17274	0.0472545		1.03131	0.625143		-1.17315	0.0131105
EF0071	lipoprotein, putative	1.26617	0.00183231		1.06503	0.422124		-1.05558	0.482531
EF0073	transcriptional regulator, Cro/CI family	1.7226	NA		-1.01331	0.9414		1.03091	NA
EF0074	transcriptional regulator, Crp/Fnr family	-1.04455	0.473046		1.15569	0.144109		1.0513	0.298384
EF0076	oxidoreductase, short chain dehydrogenase/reductase family	1.43086	5.28091e-05		-1.10913	0.138206		1.2587	0.000150804
EF0077	conserved hypothetical protein	1.47851	2.34979e-05		-1.04603	0.416659		1.17279	0.0031374
EF0078	conserved hypothetical protein	1.13185	0.358438		1.05342	0.486594		1.19627	0.00464108
EF0079	gls24 protein	1.61406	6.03804e-06		-1.01035	0.895489		1.17244	0.00217235
EF0080	gls24 protein	1.37478	0.00010267		-1.04681	0.419257		1.18406	0.00159971
EF0081	membrane protein, putative	1.41721	0.000210251		1.18377	0.0035182		1.57249	3.20943e-06
EF0082	major facilitator family transporter	-1.6144	1.13092e-06		-1.03331	0.695084		1.02467	0.662624
EF0083	hypothetical protein	-2.03908	1.62858e-09		-1.15344	0.180499		1.062	0.136105
EF0084	hypothetical protein	-1.23899	NA		1.01181	NA		1.14771	NA
EF0085	conserved domain protein	1.22437	0.146512		-1.16015	NA		-1.03331	0.782953
EF0086	conserved domain protein	1.15213	0.57956		1.01693	NA		1.15016	NA
EF0089	conserved domain protein	1.42097	0.000636605		-1.06424	NA		-1.11499	0.206779
EF0090	diacylglycerol kinase catalytic domain protein	1.12898	0.0272355		1.0016	0.978372		-1.10783	0.0104231
EF0091	conserved hypothetical protein	1.18822	0.0151287		-1.01937	0.700676		1.02457	0.52148
EF0092	hypothetical protein	1.27606	NA		1.04792	NA		1.16226	NA
EF0093	cell wall surface anchor family protein	1.15053	0.30594		-1.20127	0.12348		-1.01264	0.934376
EF0094	formate/nitrite transporter family protein	-1.16297	0.0178406		1.09912	0.232826		-1.17219	0.0111886
EF0095	lipoprotein, putative	-1.86764	2.5919e-05		-1.09522	0.136509		1.05442	0.507063
EF0096	conserved hypothetical protein	-1.03908	0.518512		-1.11305	0.202913		1.34967	0.00075473
EF0097	regulatory protein pfoR, putative	-1.81155	0.000663837		-1.17999	0.0740408		-1.27827	0.239342
EF0098	L-serine dehydratase, iron-sulfur-dependent, beta subunit	-1.65323	0.00291623		-1.27146	0.000465378		-1.35456	0.128392
EF0099	L-serine dehydratase, iron-sulfur-dependent, alpha subunit	-1.98921	NA		-1.20031	0.00575418		-1.20852	NA
EF0100	seryl-tRNA synthetase	-1.85565	2.53385e-05		-1.15581	0.0383992		-1.128	NA
EF0101	hydrolase, alpha/beta hydrolase fold family	1.17394	0.0065065		-1.08444	0.0881356		1.11834	0.0103597
EF0102	transcriptional regulator, ArgR family	1.04126	0.499102		-1.31899	0.000403304		1.31385	1.14879e-05
EF0103	transcriptional regulator, ArgR family	-1.04878	0.39888		-1.05322	0.297566		1.36883	3.03867e-06
EF0104	arginine deiminase	-1.59349	2.84949e-06		1.9845	1.47722e-05		-4.66902	3.33067e-16
EF0105	ornithine carbamoyltransferase	-2.09077	0.00213074		1.66365	NA		-6.57754	NA
EF0106	carbamate kinase	-1.87607	0.00232176		2.14687	0.000148309		-6.55949	7.61613e-14
EF0107	transcriptional regulator, Crp/Fnr family	-1.83123	0.00181906		2.03577	5.73724e-05		-4.63741	0
EF0108	C4-dicarboxylate transporter, putative	-1.8845	0.00358869		2.19722	3.25974e-07		-4.58274	4.44089e-16
EF0109	ThiJ/PfpI family protein	1.2419	0.0666481		1.09579	0.237871		-1.26478	0.00154533
EF0110	transcriptional regulator, ArsR family	1.12553	0.305993		1.05272	0.397358		-1.28043	0.000392004
EF0111	oxidoreductase, zinc-binding	-1.05071	NA		1.06759	0.432056		-1.28301	0.0129567
EF0112	conserved domain protein	-1.90191	6.1489e-05		-1.05725	NA		-1.36566	0.000619899
EF0113	hypothetical protein	-1.54108	5.78645e-06		-1.01169	0.848241		-1.0427	0.719851
EF0114	glycosyl hydrolase, family 20	1.04918	0.519267		-1.02849	0.690804		-1.30461	0.000231165
EF0115	endoribonuclease L-PSP, putative	1.13013	0.185852		-1.0252	NA		-1.30357	0.0151301
EF0116	conserved hypothetical protein	1.25284	0.00193629		-1.02274	0.703163		-1.13894	0.0591521
EF0117	transcriptional regulator, GntR family	1.29043	0.00148811		-1.07738	0.235978		-1.12617	0.0644394
EF0118	ornithine cyclodeaminase, putative	1.02539	NA		-1.21415	NA		-1.06907	NA
EF0119	phenazine biosynthesis protein PhzF family	1.74663	NA		-1.2789	0.0602984		1.14474	0.279413
EF0120	conserved hypothetical protein	-1.36982	0.0294624		-1.11295	0.132652		-1.07412	0.201032
EF0121	hypothetical protein	-1.25631	0.0109181		1.20983	0.0137404		1.00872	0.862029
EF0122	conserved domain protein	-1.40837	0.0084494		-1.13124	0.0159883		-1.13187	0.0041709
EF0123	conserved hypothetical protein	-1.40324	2.47075e-05		1.06815	0.236826		-1.07768	0.0919213
EF0124	hypothetical protein	1.00426	0.959995		-1.00969	0.90113		-1.158	0.133961
EF0125	IS256, transposase	1.34368	8.43047e-05		1.1149	0.083786		1.52071	1.05501e-05
EF0126	conserved hypothetical protein	1.26226	0.00545448		1.03226	0.619102		1.09358	0.147233
EF0127	conserved hypothetical protein	-1.16317	0.044826		1.26168	0.00650733		-1.00845	0.833044
EF0128	hypothetical protein	-1.0164	0.78575		1.03975	0.515668		1.1108	0.0732906
EF0129	transcriptional regulator, Cro/CI family	-1.08918	0.171074		-1.0035	0.94794		1.08646	0.166263
EF0130	hypothetical protein	1.04338	0.59005		-1.02936	0.767146		-1.10279	0.253837
EF0131	conserved domain protein	-1.72514	4.91345e-06		1.10364	0.267604		-1.81921	1.95797e-07
EF0132	hypothetical protein	-2.25054	1.02053e-05		1.12079	0.0610936		-1.45286	NA
EF0133	hypothetical protein	-2.33991	3.9311e-06		1.19811	NA		-1.95582	0.000647037
EF0134	hypothetical protein	-3.57617	0.000964581		1.02962	0.684199		-1.54624	NA
EF0135	conserved hypothetical protein	1.5624	NA		-1.13976	NA		-2.00441	NA
EF0136	hypothetical protein	-1.91341	NA		1.22858	0.0464469		-1.89936	0.00015823
EF0137	nucleotidyltransferase domain protein	-1.05482	0.557514		-1.00409	0.945175		-1.20262	0.0551837
EF0138	conserved domain protein	-1.85716	NA		1.17439	NA		1.28464	NA
EF0139	FtsK/SpoIIIE family protein	-1.36704	NA		1.23038	0.0520615		-1.81582	1.96539e-05
EF0140	conserved domain protein	-1.80766	5.91951e-06		1.10718	0.16752		-1.55668	7.40792e-06
EF0141	hypothetical protein	-2.11993	7.91684e-07		-1.01168	NA		-1.6084	1.93687e-05
EF0142	conserved hypothetical protein	-1.80217	3.53069e-05		1.19679	0.0163134		-1.22513	0.161427
EF0143	transcriptional regulator, Cro/CI family	-1.88733	0.00190046		1.10584	0.274123		-1.97975	7.5494e-06
EF0144	conserved domain protein	-1.70201	0.00058435		1.13158	0.129351		-1.57404	4.53263e-05
EF0145	hypothetical protein	-1.07494	0.301671		-1.00272	0.958245		1.08955	0.0809038
EF0146	surface exclusion protein, putative	-1.18301	0.037224		-1.06953	0.546006		1.17508	0.0106084
EF0147	hypothetical protein	-1.26064	NA		-1.78224	NA		1.69441	NA
EF0149	aggregation substance, putative	-1.91698	2.79483e-05		-1.05266	0.468121		-1.53409	2.18605e-05
EF0150	membrane protein, putative	1.14728	0.0689044		-1.2859	0.0225293		-1.04032	0.566508
EF0151	hypothetical protein	-1.4291	0.00566491		-1.03879	0.642335		-1.6152	6.46973e-05
EF0152	hypothetical protein	-1.91509	0.000662425		1.0703	0.425003		-1.72723	NA
EF0153	cell wall surface anchor family protein	-2.35746	NA		1.17084	0.0881905		-1.45718	NA
EF0154	conserved hypothetical protein	-1.9415	0.000518929		1.1084	0.128805		-1.45035	NA
EF0155	conserved hypothetical protein	-1.0952	0.523284		-1.03962	0.67239		-2.08653	NA
EF0156	conserved hypothetical protein	-1.62017	0.110626		1.04255	0.756412		-1.4512	NA
EF0158	conjugal transfer protein, putative	-1.09834	NA		1.26985	0.00174056		1.45879	0.000435614
EF0159	membrane protein, putative	-1.30646	NA		-1.08253	0.65455		-1.384	0.0412359
EF0160	conserved domain protein	-1.71309	0.0115236		1.16997	0.040766		-1.05564	0.464782
EF0161	hypothetical protein	-1.57766	NA		-1.02361	0.807593		-1.99606	NA
EF0162	hypothetical protein	-1.07949	NA		-1.16466	0.299757		-2.42051	NA
EF0163	lipoprotein, putative	-1.46647	NA		1.13071	NA		-1.61	NA
EF0164	lipoprotein, putative	-1.26282	0.0191595		1.24547	0.00196033		-1.23386	0.00228075
EF0165	conserved hypothetical protein	-1.15829	NA		1.27009	NA		-1.60376	NA
EF0166	site-specific recombinase, phage integrase family	-2.34631	0.000135074		-1.13675	NA		-1.67819	0.000618485
EF0167	GMP synthase	NA	NA		NA	NA		NA	NA
EF0168	pantothenate kinase, putative	-1.12879	NA		-1.72422	NA		-1.02059	NA
EF0169	lipase/acylhydrolase	1.13899	0.122415		-1.00158	0.971114		-1.03657	0.391311
EF0170	conserved hypothetical protein	1.07934	0.324067		-1.00394	0.955235		-1.01914	0.606994
EF0171	adenosine deaminase	1.5636	0.0226125		-1.2642	0.0032724		-1.08467	0.458793
EF0172	sugar-binding transcriptional regulator, LacI family	-1.13697	0.0311448		1.01955	0.735324		1.15328	0.00212941
EF0173	pyrimidine-nucleoside phosphorylase	-1.25412	0.0212811		-1.07326	0.112742		1.11566	0.025593
EF0174	deoxyribose-phosphate aldolase	-2.5878	NA		2.80235	NA		1.36036	0.554827
EF0175	cytidine deaminase	-1.23566	0.025554		-1.0092	0.869912		1.01455	0.762714
EF0176	basic membrane protein family	-1.2852	0.000179209		1.02926	0.596102		-1.0123	0.782682
EF0177	basic membrane protein family	-1.12791	0.0529914		1.07193	0.279334		1.00359	0.9539
EF0178	ABC transporter, ATP-binding protein	-1.05893	0.356203		1.1188	0.131623		1.01694	0.74301
EF0179	ABC transporter, permease protein	-1.21865	0.00969998		1.01397	0.801671		-1.03879	0.413257
EF0180	ABC transporter, permease protein	-1.18568	0.0215646		1.01553	0.742129		-1.0758	0.224352
EF0183	hypothetical protein	-1.00951	0.923203		-1.16791	NA		1.34557	0.00361219
EF0184	hypothetical protein	-1.02875	0.758082		-1.00236	0.973335		1.03025	0.768014
EF0185	phosphopentomutase	1.11584	0.400309		1.00187	0.973753		1.02864	0.483708
EF0186	purine nucleoside phosphorylase	1.22532	0.00687051		-1.02735	0.594897		-1.01804	0.694629
EF0187	purine nucleoside phosphorylase	1.07523	0.239057		1.06909	0.145041		-1.00296	0.952153
EF0188	iron compound ABC transporter, substrate-binding protein	1.49346	NA		-1.04534	NA		1.59469	NA
EF0191	ferrichrome ABC transporter, ATP-binding protein	1.00858	0.912962		1.11197	0.180701		1.45825	0.000171223
EF0192	ferrichrome ABC transporter, permease protein	1.12503	0.446645		1.0007	0.992729		1.06917	0.224078
EF0193	ferrichrome ABC transporter, permease protein	-1.09432	0.343882		-1.05396	0.296271		1.02729	0.593144
EF0194	NADH-dependent butanol dehydrogenase, putative	1.30637	0.000193658		-1.05956	0.378808		1.19835	0.00131459
EF0195	phosphoglycerate mutase 1	1.30085	NA		1.18931	NA		1.30849	NA
EF0196	site-specific recombinase, resolvase family	-1.08468	NA		-1.06208	NA		-1.25174	NA
EF0197	ribose 5-phosphate isomerase A	1.68346	NA		-1.67374	NA		-1.06804	NA
EF0198	ribosomal protein S12	-1.42369	0.00893373		-1.12966	0.104899		-1.27474	0.0184247
EF0199	ribosomal protein S7	-1.40318	2.46107e-05		-1.09027	0.227415		-1.0732	NA
EF0200	translation elongation factor G	-1.28633	0.00130671		-1.00379	0.94248		-1.00376	0.954024
EF0201	translation elongation factor Tu	-1.18761	0.101033		-1.02369	0.77488		-1.00406	0.946595
EF0202	phosphomethylpyrimidine kinase, putative	1.19058	0.065035		1.18853	0.013507		-1.18358	0.00838924
EF0203	cyclopropane-fatty-acyl-phospholipid synthase	1.30553	0.000655091		-1.12838	0.0518495		1.02685	0.579554
EF0205	ribosomal protein S10	-1.52605	0.000498024		-1.04117	0.481012		-1.06602	0.302569
EF0206	ribosomal protein L3	-1.39228	0.000174977		-1.07571	0.161811		-1.08848	0.0342773
EF0207	ribosomal protein L4	-1.34089	0.011309		-1.00373	0.947748		-1.06291	0.344282
EF0208	ribosomal protein L23	-1.24218	0.0953503		1.02445	0.745046		-1.25598	0.0118351
EF0209	ribosomal protein L2	-1.21646	0.0291594		1.03912	0.485982		-1.07764	0.1766
EF0210	ribosomal protein S19	-1.42189	0.000834302		-1.0148	0.790681		-1.05331	0.340058
EF0211	ribosomal protein L22	-1.15538	0.158331		1.08738	0.281619		1.01282	0.853531
EF0212	ribosomal protein S3	-1.34354	0.0552973		1.06056	0.439615		-1.09003	0.159815
EF0213	ribosomal protein L16	-1.81185	0.000165		-1.00232	0.966323		-1.07455	0.312901
EF0214	ribosomal protein L29	-1.96582	5.75533e-06		1.00871	0.872964		-1.15223	0.213455
EF0215	ribosomal protein S17	-2.05807	7.0609e-05		-1.02241	0.684733		-1.1356	0.0683896
EF0216	ribosomal protein L14	-1.20912	0.0191803		1.22812	0.0382673		1.14643	0.127863
EF0217	ribosomal protein L24	-1.31739	0.00142334		1.12634	0.0485438		-1.00616	0.901601
EF0218	ribosomal protein L5	-1.58075	0.000123346		1.13042	0.0399353		-1.04321	0.478937
EF0219	ribosomal protein S14	-1.54523	0.00277607		1.18351	0.0304281		1.01599	0.836895
EF0220	ribosomal protein S8	-2.01275	6.23813e-05		1.0444	0.528839		-1.01625	0.836234
EF0221	ribosomal protein L6	-1.40362	0.00221968		-1.01277	0.825808		-1.01565	0.791997
EF0223	ribosomal protein L18	-1.27657	0.00147285		1.10112	0.197904		1.10744	NA
EF0224	ribosomal protein S5	-1.62949	3.08901e-05		1.11226	0.0556487		-1.10557	0.0511738
EF0225	ribosomal protein L30	-1.40712	0.000313143		1.04505	0.514821		-1.04901	0.417482
EF0226	ribosomal protein L15	-1.43211	0.00231707		1.09581	0.147595		-1.01521	0.802413
EF0227	preprotein translocase, SecY subunit	-1.40084	0.0284729		1.15851	0.0482566		1.07483	0.197836
EF0228	adenylate kinase	-1.85832	2.90741e-05		1.0347	0.461701		-1.08719	0.259727
EF0229	translation initiation factor IF-1	-1.27038	0.00219547		1.11706	0.0586133		-1.01911	0.665056
EF0230	ribosomal protein L36	-1.55825	0.000115904		1.04575	0.413246		-1.08062	0.137792
EF0231	ribosomal protein S13	-1.56467	6.3483e-06		-1.06005	0.31228		-1.17877	0.0129338
EF0232	ribosomal protein S11	-1.32034	0.00218538		1.15712	0.0276483		-1.04302	0.414353
EF0233	DNA-directed RNA polymerase, alpha subunit	-1.42668	2.07656e-05		1.06511	0.211573		-1.02934	0.602042
EF0234	ribosomal protein L17	-1.54517	3.42501e-05		-1.022	0.846418		1.06681	0.173211
EF0235	membrane protein, putative	-1.16394	0.0323487		1.11124	0.153361		-1.27222	0.000176001
EF0236	peptidase, M20/M25/M40 family	-1.30608	0.0188248		1.02679	0.575562		-1.2435	0.00113112
EF0237	ABC transporter, ATP-binding protein	1.10252	0.120299		1.05885	0.307662		1.07436	0.0675021
EF0238	ABC transporter, ATP-binding protein	1.19705	0.0133221		-1.13533	0.0227445		-1.0475	0.232727
EF0239	cobalt transport family protein	1.27571	0.000390529		-1.04806	0.42466		-1.01789	0.659014
EF0241	conserved hypothetical protein	1.32958	0.000519565		1.03189	0.63453		1.29502	0.00141467
EF0243	branched-chain amino acid transport system II carrier protein	-1.13309	0.155268		1.10239	0.244998		1.19112	0.0661762
EF0244	acetyltransferase, GNAT family	-1.6895	0.00141536		1.08982	0.265076		1.06879	0.564774
EF0245	decarboxylase family protein	1.35567	0.0277339		-1.17122	0.0103436		1.3374	0.00549231
EF0246	amino acid ABC transporter, ATP-binding protein	-1.42931	0.000294921		-1.0308	0.746835		-1.32209	8.19721e-06
EF0247	amino acid ABC transporter, amino acid-binding/permease protein	-1.58834	0.000863646		1.02448	0.693889		-1.53514	4.34619e-07
EF0248	hypothetical protein	-1.35258	0.00234438		1.09022	0.125033		1.18365	0.0182244
EF0249	transcriptional regulator, Sir2 family	1.14699	0.0348432		1.01501	0.785645		1.16368	0.00385591
EF0250	maltose O-acetyltransferase, putative	1.19345	0.00582086		1.02732	0.637812		1.02202	0.612499
EF0251	transcriptional regulator, putative	1.10185	0.0688372		1.09799	0.147819		-1.09401	0.0362834
EF0252	N-acetylmuramoyl-L-alanine amidase, family 4	1.50261	2.57077e-06		1.05941	0.394197		1.26497	0.00161636
EF0253	aldehyde dehydrogenase	1.1179	NA		1.06287	0.552461		-1.28281	NA
EF0255	L-lactate dehydrogenase	-1.18942	0.00765826		1.09721	0.0375818		1.19727	0.000831451
EF0256	peptidyl-tRNA hydrolase	-1.46578	0.0263137		1.11804	0.0897794		-1.00577	0.899395
EF0257	transcription-repair coupling factor	-1.60708	0.0314532		-1.04668	0.51468		-1.22679	0.00852581
EF0258	polysaccharide biosynthesis family protein	-1.37173	0.0872389		-1.00138	0.981411		1.00948	0.887288
EF0259	S4 RNA-binding domain protein	-1.19734	0.325353		1.08456	0.118971		-1.10968	0.0930504
EF0260	hypothetical protein	-1.62456	0.0509942		1.06944	0.418424		-1.07344	0.278852
EF0261	conserved hypothetical protein	1.08572	0.10494		1.12957	0.0627684		1.0189	0.672646
EF0262	S1 RNA-binding domain protein	1.01914	0.737237		1.14434	0.0278568		1.04003	0.372035
EF0263	tRNA(Ile)-lysidine synthetase	1.00783	0.905162		1.10429	0.0377098		-1.12299	NA
EF0264	hypoxanthine-guanine phosphoribosyltransferase	-1.12114	0.0377038		1.14835	0.112478		-1.19847	0.000263875
EF0265	cell division protein FtsH	1.01165	0.824556		1.006	0.918597		-1.29048	1.79967e-05
EF0266	chaperonin, 33 kDa	1.34171	0.0128953		1.16181	0.0126377		1.36167	0.000102635
EF0267	zinc-binding TIM-barrel protein, nifR3 family, putative	1.256	0.0111504		1.08118	0.16933		1.17926	0.000282852
EF0268	lysyl-tRNA synthetase	-1.069	0.237665		-1.03552	0.473369		-1.06201	0.171423
EF0270	PTS system, beta-glucoside-specific IIABC component	-1.38912	NA		1.09143	NA		-1.54624	0.0676991
EF0271	glycosyl hydrolase, family 1	1.04155	0.605906		-1.2518	NA		-1.0663	0.49213
EF0272	glycosyl hydrolase, family 1	1.10799	NA		-1.06714	NA		1.0246	NA
EF0273	phosphoglycerate mutase family protein	-1.29189	NA		1.11898	NA		1.21291	NA
EF0274	conserved hypothetical protein	1.26603	0.0353285		1.18799	0.034594		1.14966	0.0310372
EF0275	ada regulatory protein, putative	1.31448	0.00571318		-1.08241	0.331502		1.14249	0.0394122
EF0277	methylated-DNA--protein-cysteine S-methyltransferase	-1.08358	0.272569		-1.04769	0.546747		-1.21373	NA
EF0278	DNA-3-methyladenine glycosylase I	-1.09213	0.249454		1.04231	0.587818		-1.33213	0.00294455
EF0279	HD domain protein	-1.03475	0.643163		1.03508	0.577393		-1.24578	0.0167296
EF0280	cation efflux family protein	-1.11095	0.109292		1.09983	0.315901		1.05349	0.389581
EF0281	hypothetical protein	-1.08867	0.24893		1.14208	0.0639714		1.10058	0.250495
EF0282	enoyl-(acyl-carrier-protein) reductase	1.26364	0.000985661		-1.08097	0.262375		1.0754	0.281984
EF0283	3-oxoacyl-(acyl-carrier-protein) synthase II	1.26656	0.00240829		-1.17373	0.017598		1.07358	0.167634
EF0284	(3R)-hydroxymyristoyl-(acyl-carrier-protein) dehydratase	1.13693	0.0558499		-1.20049	0.00633222		1.05107	0.296085
EF0285	dihydroorotate dehydrogenase	1.33335	0.00054728		-1.11878	0.0179397		-1.0405	0.381915
EF0286	fibronectin-binding protein, putative	-1.30894	0.0561726		1.0011	0.986296		1.31762	0.00011331
EF0287	translation elongation factor P	-1.04114	0.47232		-1.04143	0.651287		-1.06573	0.126242
EF0288	hypothetical protein	1.68333	1.91559e-05		-1.25033	0.0409947		1.42848	6.43666e-05
EF0289	cysteine synthase B, putative	1.40306	0.000239385		-1.29525	1.1327e-05		-1.25262	0.00269177
EF0290	cystathionine beta-lyase	1.40175	5.34514e-05		-1.12005	0.1475		-1.35948	0.00221321
EF0291	glycosyl hydrolase, family 1	-1.03136	NA		-1.3632	NA		-1.02717	0.81855
EF0292	PTS system, IIC component	1.25433	NA		1.25942	NA		-1.62149	NA
EF0293	phosphosugar-binding transcriptional regulator, putative	1.2082	0.0108437		-1.17104	0.117985		1.03351	0.605624
EF0294	conserved hypothetical protein	1.15274	0.0356869		-1.01926	0.670136		1.10756	0.0416655
EF0295	V-type ATPase, subunit J	1.03381	0.758418		1.05056	0.521586		1.29964	0.00116165
EF0296	Na+/H+ antiporter	1.02999	0.759533		1.00433	0.933054		1.34536	0.00016466
EF0297	transcriptional repressor CopY	1.02614	0.715132		1.01897	0.804519		12.8849	0
EF0298	copper-translocating P-type ATPase	-1.10007	0.212675		-1.14618	0.0568319		9.63117	0
EF0299	copper transport protein CopZ	-1.25461	0.0955215		-1.06211	NA		6.11288	3.2538e-11
EF0300	membrane protein, putative	-1.01932	0.804856		1.01592	0.824239		-1.17511	0.0504377
EF0301	transcriptional regulator, GntR family	-1.14366	0.0548215		-1.00967	0.886786		-1.19831	0.058843
EF0302	aminopeptidase C	1.15454	0.0761421		-1.10793	0.117913		-1.00201	0.965449
EF0303	phage integrase	-1.03916	0.649935		1.07333	0.421185		1.02793	0.753036
EF0304	lipoprotein, putative	-1.11837	0.1516		1.13956	0.0358049		-1.05988	0.211708
EF0305	conserved domain protein	-1.19989	0.0534611		-1.1693	0.0170443		-1.24313	0.015064
EF0306	transcriptional regulator, Cro/CI family	-1.25772	0.00689671		-1.05232	0.319357		-1.10901	0.048189
EF0307	transcriptional regulator, Cro/CI family	1.13267	NA		-1.22248	NA		1.15716	0.179226
EF0308	conserved hypothetical protein	1.21612	0.0126976		-1.20496	0.0682053		1.3655	5.65823e-05
EF0309	excisionase, putative	1.07129	0.445228		-1.06167	0.685629		1.34458	0.000209322
EF0310	hypothetical protein	-1.01751	0.880123		-1.144	NA		1.42895	4.74292e-05
EF0311	hypothetical protein	1.12359	0.131501		-1.0336	0.706247		1.41832	1.00507e-05
EF0312	aspartate 1-decarboxylase domain protein	-1.06598	0.432797		-1.22554	0.00548046		1.45143	4.15173e-05
EF0313	hypothetical protein	1.10985	0.217842		1.14244	0.0301891		1.3459	7.98105e-05
EF0314	hypothetical protein	1.24767	0.0346365		-1.49046	NA		1.35629	0.0023039
EF0315	conserved hypothetical protein	1.07898	0.363489		-1.15162	0.0433258		1.51773	0.00212264
EF0316	hypothetical protein	1.04552	0.573844		-1.23033	0.00253976		1.34829	0.000182171
EF0317	transcriptional regulator, Cro/CI family	1.05181	0.503039		-1.17961	NA		1.39617	3.59124e-05
EF0318	conserved hypothetical protein	1.10063	0.440128		-1.30388	0.00994855		1.56023	1.70199e-06
EF0319	conserved hypothetical protein	1.12915	0.108661		-1.28606	0.00111924		1.44618	5.24709e-06
EF0320	hypothetical protein	-1.04704	0.654963		-1.19542	NA		1.49387	1.60181e-05
EF0321	hypothetical protein	-1.03166	0.83731		-1.17016	0.0868492		1.64756	NA
EF0322	conserved hypothetical protein	1.17036	0.114508		-1.08216	0.382692		1.66533	3.13503e-05
EF0323	hypothetical protein	1.14787	0.106018		-1.1153	0.193441		1.35383	0.00960868
EF0324	hypothetical protein	-1.00116	0.991752		-1.27324	0.0118081		1.5927	6.68677e-05
EF0325	DNA polymerase, putative	1.04956	0.564189		-1.20866	0.0178598		1.17713	0.0817832
EF0326	conserved hypothetical protein	1.09842	0.25071		-1.24042	0.00624269		1.38986	0.000223942
EF0327	hypothetical protein	-1.20016	0.371148		-1.20611	0.0130765		1.48922	2.76108e-05
EF0328	conserved hypothetical protein	1.07821	0.365966		-1.00878	0.905019		1.23651	0.0122471
EF0329	conserved hypothetical protein	1.00684	0.936196		-1.21926	0.00402383		1.21354	0.0178251
EF0330	SNF2 domain protein	1.22208	0.0623027		-1.45607	0.109873		1.18167	0.11895
EF0331	conserved hypothetical protein	-1.30329	0.395865		-1.21405	0.170629		1.49248	NA
EF0332	conserved hypothetical protein	1.50934	0.000114696		-1.38065	0.0002469		1.77413	1.26926e-08
EF0333	conserved hypothetical protein TIGR01630	1.19463	NA		-1.59853	5.31991e-07		1.53611	4.28088e-06
EF0334	portal protein	1.41719	0.000512386		-1.4888	0.000105578		1.61231	2.26825e-06
EF0335	minor head protein	1.53633	3.15945e-05		-1.54719	9.8454e-06		1.47461	0.0121194
EF0336	hypothetical protein	1.43754	4.39486e-05		-1.0206	0.746957		1.48173	3.43995e-08
EF0337	hypothetical protein	1.36455	0.000161277		-1.47176	3.31305e-05		1.69648	1.32031e-09
EF0338	scaffold protein	1.15865	0.0189803		-1.48935	6.5798e-05		1.52976	3.31323e-08
EF0339	major capsid protein, putative	1.0284	0.658017		-1.5138	7.7422e-05		1.48141	8.31618e-06
EF0340	hypothetical protein	1.15106	0.0328784		-1.48651	7.80673e-06		1.55178	1.65274e-08
EF0341	hypothetical protein	1.20545	0.0118013		-1.64081	3.24253e-05		1.58068	2.22644e-08
EF0342	hypothetical protein	1.17744	0.0279209		-1.57964	0.000152152		1.52622	4.57499e-08
EF0343	conserved hypothetical protein TIGR01725	1.1773	0.0104041		-1.50721	1.12848e-05		1.66163	2.2709e-08
EF0344	hypothetical protein	1.15422	0.0456664		-1.66519	7.86257e-07		1.44411	2.41244e-06
EF0345	conserved domain protein	1.17286	0.0108327		-1.47454	8.20756e-06		1.64113	7.65232e-09
EF0346	hypothetical protein	-1.00461	NA		-3.75729	NA		1.29811	NA
EF0347	peptide methionine sulfoxide reductase domain protein	1.20741	0.0172446		-1.65555	5.36967e-07		1.50207	4.13888e-07
EF0348	tail protein	1.39035	0.00162949		-1.75713	2.50399e-08		1.53547	4.79925e-07
EF0349	tail protein, putative	1.58758	0.00765829		-1.44556	0.000446237		1.53441	1.0855e-07
EF0350	conserved hypothetical protein	1.16942	0.0351518		-1.54263	1.50238e-06		1.49329	1.17206e-06
EF0351	structural protein, putative	1.2501	0.00110278		-1.52292	3.62708e-05		1.47923	1.41762e-07
EF0352	hypothetical protein	1.15522	0.0407128		-1.5934	NA		1.57129	1.1006e-07
EF0353	holin, putative	1.20608	0.0147972		-1.75851	NA		1.44492	4.00576e-06
EF0354	holin, putative	1.07784	0.294151		-1.54864	2.14541e-05		1.47011	3.17567e-07
EF0355	endolysin, putative	1.14538	0.0312571		-1.53193	3.17559e-07		1.46358	7.92749e-07
EF0356	hypothetical protein	-1.08047	NA		-1.897	NA		NA	NA
EF0357	conserved hypothetical protein	1.13839	0.118438		1.04567	0.67893		1.049	0.617231
EF0358	glyoxalase family protein	1.14447	0.0937766		-1.03066	0.606401		1.12693	0.0302922
EF0359	sugE protein	1.21335	NA		-1.00591	0.946883		-1.02134	NA
EF0360	sugE protein	1.11511	0.222396		1.24458	0.02794		1.18521	0.0312638
EF0361	chitinase, family 2	1.20414	NA		1.13749	0.518769		-1.7373	NA
EF0362	chitin binding protein, putative	1.48766	0.00606652		1.29874	0.022402		-1.24017	NA
EF0365	conserved hypothetical protein	1.15125	0.0142431		-1.01615	0.702807		-1.01798	0.672223
EF0366	conserved hypothetical protein	1.14238	0.022526		1.01963	0.644055		-1.002	0.962014
EF0367	conserved hypothetical protein	1.02723	0.61386		-1.02622	0.698148		-1.00976	0.866508
EF0368	aspartate kinase	1.18647	0.0717304		-1.0309	0.67728		-1.07562	0.156017
EF0369	hydrolase, haloacid dehalogenase-like family	-1.00209	0.978728		1.11662	0.171245		1.18746	0.0398087
EF0370	conserved hypothetical protein	-1.23515	0.00261515		1.00579	0.903534		-1.10033	0.0293118
EF0371	aminotransferase, class V	-1.19531	0.00979105		1.18582	0.0293943		1.20424	0.00412591
EF0372	DNA-binding response regulator	1.0459	0.523336		1.0418	0.54164		-1.17204	0.0119984
EF0373	sensor histidine kinase	-1.17401	0.397988		1.14195	0.264872		1.16396	NA
EF0374	lipoprotein, putative	1.08267	NA		-1.08145	NA		1.00248	NA
EF0375	hypothetical protein	1.26072	0.0212731		-1.0513	0.506542		-1.33433	0.0519201
EF0376	hypothetical protein	-1.07441	0.629421		-1.20555	0.0320341		-1.34817	0.0110282
EF0377	ankyrin repeat family protein	1.58222	0.000299554		1.07739	NA		-1.10007	0.117005
EF0379	death-on-curing family protein	1.17672	0.0140764		1.04934	0.359758		1.14785	0.0226274
EF0380	conserved hypothetical protein	1.1105	0.109405		1.12177	0.0525609		1.16462	0.00600721
EF0381	conserved hypothetical protein	1.19521	0.0165527		-1.14252	0.0271851		1.03488	0.49514
EF0382	conserved hypothetical protein	-1.09056	0.1982		-1.08942	0.105733		-1.13217	0.0186828
EF0383	protein FdrA/conserved hypothetical protein	1.06177	NA		-1.40474	NA		1.01537	NA
EF0384	hypothetical protein	-1.09947	NA		-1.20629	NA		1.03097	NA
EF0385	major facilitator family transporter	-1.67728	0.180595		-1.37553	NA		-1.11337	NA
EF0386	carbamate kinase	2.82382	9.91396e-05		1.01942	NA		1.05186	NA
EF0387	sodium/dicarboxylate symporter family protein	1.8631	0.00138608		-1.25457	0.0337558		1.20029	0.30123
EF0388	ureidoglycolate dehydrogenase	2.5771	NA		-1.00751	NA		1.26263	NA
EF0389	membrane protein, putative	2.53316	0.000150602		-1.05576	0.536041		1.14621	NA
EF0390	N-acyl-D-amino-acid deacylase family protein	2.38152	8.6276e-05		-1.11665	0.319487		1.47341	0.0167571
EF0392	hypothetical protein	1.49176	8.70247e-05		-1.12686	NA		-1.22589	0.0177379
EF0393	hypothetical protein	-1.76068	NA		-1.83337	NA		#VALUE!	NA
EF0394	secreted antigen, putative	1.05951	0.508215		-1.17869	0.337617		-1.23927	0.00146535
EF0395	methionine synthase, putative	-1.04598	0.530993		-1.14724	0.0137117		1.03064	NA
EF0396	conserved hypothetical protein	-1.02444	0.701819		1.04488	0.559935		-1.0805	0.147422
EF0397	conserved hypothetical protein	-1.00851	0.887179		-1.02077	0.778504		1.02025	0.755146
EF0398	hypothetical protein	-1.64904	NA		-1.04971	NA		#VALUE!	NA
EF0399	conserved hypothetical protein	-1.59818	6.92778e-06		1.04404	0.538813		-1.15625	0.00651809
EF0400	conserved hypothetical protein	-1.4977	0.00015332		1.03003	0.643938		-1.15647	0.00654519
EF0401	pyrrolidone-carboxylate peptidase	-1.23242	0.0080736		-1.01232	0.851187		-1.15607	0.0063629
EF0402	Na+/H+ antiporter	1.32837	0.00368744		1.06411	0.515635		1.19669	0.00974375
EF0403	transcriptional regulator, MarR family	-1.02647	0.727032		1.14303	0.110913		1.11808	0.103768
EF0404	nitroreductase family protein	-1.06291	0.446322		1.11865	0.0903116		1.11451	0.0625429
EF0405	hydrolase, haloacid dehalogenase-like family	1.00517	0.976613		-1.05235	0.364732		-1.20894	0.00242276
EF0406	PTS system, IIBC component	-1.13087	0.464578		-1.05918	0.546637		1.64814	NA
EF0407	transcriptional regulator, putative	-1.17707	0.404475		1.0452	0.561768		-1.24954	NA
EF0408	PTS system, IIA component	-1.23159	0.101599		1.0692	0.404745		-1.28759	0.00401617
EF0409	hypothetical protein	1.46993	NA		1.24843	NA		1.29867	0.0991579
EF0411	PTS system, mannitol-specfic IIBC components	-1.10699	NA		1.48852	NA		2.61753	NA
EF0412	PTS system, mannitol-specific IIA component	1.13061	NA		-1.39501	NA		#VALUE!	NA
EF0413	mannitol-1-phosphate 5-dehydrogenase	1.04777	NA		-1.79634	NA		1.30821	NA
EF0414	oxidoreductase, DadA family	-1.05045	NA		-1.25971	0.142104		-1.00672	NA
EF0415	conserved hypothetical protein	1.84288	NA		1.11438	0.151923		1.13164	0.0857695
EF0417	conserved hypothetical protein	1.25403	0.00168443		1.05377	0.333881		1.36896	1.82821e-05
EF0419	conserved hypothetical protein	-1.33353	0.0129182		-1.13681	0.0353555		1.04654	0.333927
EF0420	drug resistance transporter, EmrB/QacA family protein	-1.25255	0.0162801		-1.00076	0.991331		1.22007	0.00689871
EF0421	transcriptional regulator, MerR family	-1.05735	0.507093		-1.00639	0.924284		1.19874	0.0213201
EF0422	transcriptional regulator, IclR family	1.00964	0.889505		1.06389	0.255454		-1.09496	0.111218
EF0423	2-dehydro-3-deoxyphosphogluconate aldolase	1.11747	0.401988		1.05722	0.612852		1.01413	0.887284
EF0424	2-dehydro-3-deoxygluconokinase, putative	1.36423	0.025075		1.15299	0.265996		-1.18145	0.121644
EF0425	4-deoxy-l-threo-5-hexosulose-uronate ketol-isomerase	1.15007	0.284344		1.06377	0.39733		-1.13409	0.255384
EF0426	gluconate 5-dehydrogenase, putative	-1.17363	0.402222		-1.11928	0.454412		1.02267	0.872629
EF0428	conserved hypothetical protein	1.85148	NA		1.58465	NA		1.12922	NA
EF0429	TRAP dicarboxylate transporter, DctP subunit	1.32106	NA		1.03973	NA		2.05913	NA
EF0430	TRAP dicarboxylate transporter, DctQ subunit	-1.01152	NA		-2.01201	NA		-1.02589	NA
EF0431	TRAP dicarboxylate transporter, DctM subunit	1.35659	NA		1.34152	NA		1.14049	NA
EF0432	transcriptional regulator, AraC family	1.35549	NA		-1.03169	NA		1.78495	NA
EF0433	rhamnulokinase, putative	1.36657	NA		1.19016	NA		1.47853	NA
EF0434	L-rhamnose isomerase	-1.25967	NA		-1.7047	NA		1.26281	0.0125129
EF0435	rhamnulose-1-phosphate aldolase	1.24155	NA		1.10111	0.528568		-1.22281	NA
EF0436	conserved hypothetical protein	-2.00385	NA		-1.16627	NA		-1.00169	NA
EF0437	transcriptional regulator, AraC family	1.30408	NA		-1.10943	NA		-1.01807	NA
EF0438	conserved domain protein	2.39515	NA		-1.08781	0.510591		-1.01497	NA
EF0439	immunity protein PlnM, putative	1.06285	NA		1.04095	0.623287		-1.58614	0.000824371
EF0440	di-/tripeptide transporter	1.08789	0.365015		-1.0866	0.192901		1.16611	0.0562221
EF0441	hypothetical protein	1.01861	NA		1.22047	NA		-1.91006	NA
EF0442	hypothetical protein	-1.16153	NA		1.10936	NA		2.1464	NA
EF0443	LysM domain protein	1.33205	0.0063162		-1.00106	0.987428		1.61828	2.44884e-07
EF0445	naphthoate synthase	1.31614	0.00302159		1.10646	0.118698		1.13191	0.0952852
EF0446	O-succinylbenzoic acid--CoA ligase, putative	-1.04776	0.673055		-1.14146	0.0191944		-1.06274	0.324869
EF0447	menaquinone-specific isochorismate synthase, putative	1.08037	0.159372		-1.09021	0.0997014		-1.00932	0.823525
EF0448	2-succinyl-6-hydroxy-2,4-cyclohexadiene-1-carboxylic acid synthase	1.00383	0.947763		1.01183	0.847601		-1.09046	0.0630886
EF0449	hydrolase, alpha/beta hydrolase fold family	1.10411	0.291582		-1.06596	0.161294		-1.03619	0.466251
EF0450	mandelate racemase/muconate lactonizing enzyme family protein	1.04281	0.492691		1.04345	0.483118		-1.06397	0.108247
EF0451	glucosamine-6-phosphate isomerase, putative	-1.31725	0.00457148		1.00299	0.96499		-1.22756	0.00269346
EF0452	AMP-binding family protein	1.06421	0.292951		-1.00879	0.909474		1.01824	0.63711
EF0453	OsmC/Ohr family protein	1.16895	0.0501183		1.2375	0.0193585		1.26226	0.000137354
EF0454	conserved hypothetical protein	1.36	0.0165213		-1.03174	0.720167		1.00462	0.968499
EF0455	PTS system, IIC component	1.42659	NA		1.07319	0.608397		-1.02597	NA
EF0456	PTS system, IID component	-1.45286	NA		1.00792	NA		-1.1939	NA
EF0457	PTS system, IIB component	1.01361	NA		1.37466	NA		-1.05437	0.349358
EF0458	phosphosugar-binding transcriptional regulator, putative	1.06922	0.346176		-1.02632	NA		-1.05758	0.358004
EF0459	glucokinase regulator-related protein	-1.04687	0.493323		1.00594	0.930946		-1.10168	0.0738032
EF0460	conserved hypothetical protein	-1.01854	0.834095		-1.07332	0.260538		-1.44246	0.0013797
EF0461	PTS system, IIA component	1.33773	0.0367417		1.07314	0.441872		1.00165	0.984265
EF0462	conserved domain protein	1.09338	0.314735		1.07281	0.321945		1.02606	0.707314
EF0463	superoxide dismutase, Mn	1.05045	0.686413		1.09186	0.11052		-1.00826	0.88192
EF0464	diaminopimelate epimerase	-1.12147	0.106237		1.05348	0.429203		-1.34166	1.08533e-05
EF0465	transcriptional regulator	1.08162	0.261707		1.00149	0.975665		-1.08487	0.156063
EF0466	glucosamine-6-phosphate isomerase	-1.08357	0.201143		1.05178	0.307818		-1.11905	0.0539666
EF0467	MgtC family protein	-1.09558	0.269735		-1.18604	0.0457938		1.04328	0.444701
EF0468	LemA family protein	-1.27224	0.0190217		-1.02245	0.733412		2.29026	2.05004e-11
EF0469	conserved domain protein	-1.07545	0.586737		1.05297	0.439718		2.4876	6.95e-14
EF0470	ribonucleoside-diphosphate reductase 2, beta subunit	1.14559	0.105607		-1.3063	0.00233651		1.17608	0.00765426
EF0471	ribonucleoside-diphosphate reductase 2, alpha subunit	1.47317	1.25421e-05		-1.17693	0.006207		1.23369	0.00481096
EF0472	nrdI protein	1.27741	0.000844363		-1.07886	0.369288		1.06042	0.157033
EF0473	ribonucleoside-diphosphate reductase 2, NrdH-redoxin	1.43345	0.00159909		-1.00646	0.923699		1.16405	0.0147929
EF0475	ferrous iron transport protein A	-1.39508	0.000121422		1.34761	0.000349048		1.4577	0.0583638
EF0476	ferrous iron transport protein B	1.21266	0.00217258		-1.00392	0.956756		-1.22635	0.00117649
EF0477	hypothetical protein	1.25962	0.00297497		1.08829	0.141523		1.03727	0.494345
EF0478	hypothetical protein	1.06963	0.435811		1.13762	0.00826448		1.63666	1.55166e-06
EF0479	site-specific recombinase, phage integrase family	1.12133	NA		1.05942	NA		2.51576	NA
EF0480	excisionase, putative	1.05316	NA		-1.01482	NA		-8.06544	NA
EF0481	conserved hypothetical protein	2.04092	NA		-1.06118	NA		3.52359	NA
EF0482	conserved hypothetical protein	1.3657	NA		-1.33591	NA		2.29255	NA
EF0485	aggregation substance	1.1263	0.43377		-1.14946	NA		-1.12072	0.428885
EF0486	hypothetical protein	-1.5244	NA		2.24762	NA		-1.23312	NA
EF0487	conserved domain protein	1.14241	NA		1.19429	NA		1.30849	NA
EF0488	hypothetical protein	-1.96457	NA		-1.16561	NA		3.94953	NA
EF0489	conserved domain protein	-1.03525	NA		1.0659	NA		1.59901	NA
EF0490	cell wall surface anchor family protein	-1.28052	0.0237003		-1.01247	0.86282		-1.3627	0.000781958
EF0491	conserved domain protein	-1.12509	0.483904		-1.15161	NA		-1.22549	0.178247
EF0492	hypothetical protein	1.02006	NA		-1.06073	NA		1.22942	NA
EF0494	conserved hypothetical protein	1.1634	NA		-1.12912	NA		-1.24947	NA
EF0498	hypothetical protein	-1.08897	NA		1.46161	NA		1.40971	NA
EF0499	single-strand binding protein	-1.04934	0.433167		-1.06965	0.655848		-1.00889	0.916225
EF0500	conserved hypothetical protein	1.0319	NA		1.98138	NA		-1.22276	NA
EF0501	lipoprotein, putative	-1.1057	0.260305		-1.0035	NA		-1.09856	0.301571
EF0502	membrane protein, putative	1.02148	NA		1.83837	NA		1.13567	NA
EF0503	hypothetical protein	-2.2744	NA		1.55807	NA		-1.58123	NA
EF0504	hypothetical protein	-1.06322	NA		-1.0063	NA		-1.1381	NA
EF0505	hypothetical protein	1.17638	NA		1.02204	NA		1.43846	NA
EF0506	hypothetical protein	-1.17397	NA		1.1392	NA		1.00172	NA
EF0507	hypothetical protein	-1.08719	NA		1.01134	NA		-2.93464	NA
EF0508	conserved domain protein	-1.11547	NA		-1.18931	0.422931		1.25142	NA
EF0509	conserved hypothetical protein	-1.41098	0.0804136		1.54146	NA		-1.99483	NA
EF0510	single-strand binding protein	1.09991	0.50107		1.2909	NA		-1.0194	NA
EF0511	thermonuclease precursor	-1.02882	0.874334		-1.02647	NA		-1.25975	NA
EF0512	DNA-damage-inducible protein J, putative	-1.44778	0.0149212		1.14362	0.0434622		-1.28851	3.72893e-05
EF0513	conserved hypothetical protein TIGR00053	5.3693	NA		-1.08427	NA		1.35984	NA
EF0516	membrane protein, putative	-1.18383	0.0256615		-1.04975	0.616992		1.36417	4.45435e-05
EF0517	2-dehydropantoate 2-reductase, putative	-1.16045	0.0354646		-1.08634	0.322478		1.23288	0.00285695
EF0518	cell wall surface anchor family protein	-1.12146	0.20923		1.03089	0.700113		1.25607	0.0585255
EF0519	hypothetical protein	1.01199	0.873947		1.01318	0.855025		1.4029	0.00092782
EF0521	bile salt hydrolase	1.48679	7.7086e-05		-1.03207	0.58245		1.29618	1.87328e-05
EF0524	transcriptional regulator, Cro/CI family	1.03434	0.676197		-1.04676	NA		1.03558	0.535932
EF0525	cylL-L protein	-1.25774	0.00122614		1.0809	0.482089		-1.17593	0.0473267
EF0526	cylL-S protein	-1.26877	0.0003538		-1.01974	0.680604		-1.05499	0.42975
EF0527	cylM protein	-1.23007	0.014408		1.02105	0.733234		-1.17439	0.0197761
EF0530	transcriptional regulator, AraC family	-1.08423	0.370198		1.0007	0.992851		1.10281	0.259896
EF0531	hypothetical protein	1.0646	NA		-1.10201	NA		1.30589	0.011
EF0532	hypothetical protein	1.13417	0.0966242		-1.13871	0.318872		1.17201	0.0512054
EF0533	hypothetical protein	-1.02822	0.758806		1.00849	0.919772		1.09956	0.283292
EF0534	site-specific recombinase, resolvase family	-1.01072	0.875511		1.05331	0.509426		1.08183	0.142979
EF0539	phosphosugar-binding transcriptional regulator, RpiR family	1.1914	0.290426		1.24817	NA		1.08952	0.457927
EF0540	N-acetylmannosamine-6-phosphate epimerase, putative	1.55248	NA		1.04887	0.682475		3.6177	NA
EF0542	conserved hypothetical protein	-1.18506	0.0265257		-1.09473	NA		1.26168	0.00257991
EF0543	membrane protein, putative	-1.08092	0.255407		-1.14825	0.0781841		1.26667	0.000901222
EF0544	ribosomal protein L32	-1.18528	0.0175057		-1.00759	0.892901		-1.10214	0.105612
EF0545	conserved domain protein	-1.13457	0.0989413		-1.0442	0.512426		-1.14648	0.0330848
EF0546	conserved hypothetical protein	-1.06897	0.327999		1.08333	0.204551		-1.08558	0.2018
EF0547	ammonium transporter family protein	-1.0949	0.403255		-1.04014	0.594091		-1.25694	0.19477
EF0548	conserved hypothetical protein	-1.19343	0.195753		-1.00499	0.944586		-1.07912	0.385185
EF0550	xylose repressor, putative	1.05906	0.524101		-1.12822	NA		1.17377	0.158941
EF0551	glycosyl hydrolase, family 31	1.32951	0.00312006		1.17891	0.0855341		1.00376	0.966454
EF0552	PTS system, IIC component	1.62272	7.486e-05		1.08667	NA		1.01378	NA
EF0553	PTS system, IID component	1.81771	4.42004e-05		1.17948	0.0600213		-1.06977	NA
EF0554	PTS system, IIB component	1.10611	NA		1.04119	0.594011		-1.20599	0.095222
EF0555	PTS system, IIA component	1.17942	NA		1.00306	NA		-1.13874	0.216584
EF0556	xylose isomerase	1.25745	NA		-1.08142	0.427015		-1.18184	NA
EF0557	D-xylulose kinase	1.44693	NA		1.40256	NA		-1.41822	NA
EF0559	polysaccharide biosynthesis family protein	1.15248	0.0522233		-1.21527	NA		1.58576	6.27737e-05
EF0562	hypothetical protein	1.09835	0.0944004		1.01492	0.753941		1.7619	6.18233e-07
EF0563	hypothetical protein	1.138	0.0658473		1.01913	0.746813		1.75555	1.56269e-06
EF0564	hypothetical protein	1.05774	0.656579		1.1218	0.0800186		2.06302	3.22599e-08
EF0566	potassium transporter stabilization peptide KdpF	1.2543	NA		1.10615	0.471679		2.17615	NA
EF0567	potassium-transporting ATPase, subunit A	1.86832	2.80751e-06		1.00467	0.946729		1.65111	1.12569e-06
EF0568	potassium-transporting ATPase, subunit B	1.27793	0.037733		1.10743	0.218382		1.58926	1.68674e-07
EF0569	potassium-transporting ATPase, subunit C	1.09075	0.359299		-1.01513	0.856396		1.48861	1.73308e-06
EF0570	sensor histidine kinase KdpD	1.67452	0.0263138		1.12766	0.0476314		1.2165	0.0130169
EF0571	DNA-binding response regulator	1.47093	0.000108862		1.08086	0.205353		1.16191	0.0119431
EF0573	hypothetical protein	1.18328	NA		-1.02547	0.677677		-1.15293	NA
EF0574	hypothetical protein	1.10323	NA		1.05454	NA		-1.00263	NA
EF0575	cationic ABC transporter, ATP-binding protein	2.64082	3.59486e-10		-8.20691	1.09523e-09		-1.84797	5.67476e-07
EF0576	cation ABC transporter, permease protein	3.96564	1.41127e-11		-7.0443	5.24054e-11		-1.86433	6.24941e-07
EF0577	adhesion lipoprotein	3.84664	4.57909e-11		-5.39078	3.58533e-11		-1.67415	NA
EF0578	helix-turn-helix protein, iron-dependent repressor family	6.40313	1.87163e-05		-4.76901	9.34057e-06		-1.48696	NA
EF0579	transcriptional regulator, putative	2.62307	1.78386e-10		-1.90374	7.29892e-07		-1.26695	0.0140575
EF0580	conserved hypothetical protein	1.60111	0.000138838		-1.31091	0.00112214		-1.44673	0.0046468
EF0581	ABC transporter, ATP-binding protein	1.42445	0.000115213		-1.29815	0.000902316		-1.27444	0.00174719
EF0582	membrane protein, putative	1.30542	0.0117807		-1.44653	2.83403e-05		-1.39225	6.84398e-05
EF0583	ABC transporter, ATP-binding protein/permease protein	1.35156	0.00568485		-1.5237	2.48838e-06		-1.31029	0.00186194
EF0584	ABC transporter, ATP-binding/permease protein	1.2814	0.0444711		-1.51785	2.47108e-06		-1.53949	0.000131856
EF0585	ribosomal protein S14	-1.59655	NA		1.02942	0.80493		-1.01926	0.853712
EF0586	ribosomal protein L32	-2.24145	NA		-1.11274	NA		1.12441	0.132193
EF0587	hypothetical protein	-1.93394	0.016307		-1.05133	NA		-1.09832	0.369857
EF0588	ribosomal protein L33	-2.61258	NA		1.07859	NA		-1.02223	0.847008
EF0589	conserved domain protein	-1.59689	NA		-1.12803	0.238671		-1.05837	0.711347
EF0590	polysaccharide deacetylase family protein	1.07657	NA		-1.02532	0.8208		-1.29221	NA
EF0594	hypothetical protein	1.34571	0.0289905		1.21845	NA		1.11029	0.211678
EF0599	conserved domain protein	-1.50523	0.0106147		-1.09362	NA		1.24086	0.0274885
EF0600	transcriptional regulator, TetR family	-1.21694	0.0219461		1.15627	NA		1.08321	0.244166
EF0601	transcriptional regulator, TetR family	-1.10877	0.0994299		1.06123	0.40459		-1.01536	0.793614
EF0603	conserved domain protein	-1.13464	0.306675		-1.0518	NA		1.11462	NA
EF0604	gls24 protein	-1.11261	0.145698		1.03421	NA		-1.0449	0.520186
EF0605	conserved hypothetical protein	-1.08231	0.37158		-1.01414	NA		1.22464	0.0662807
EF0606	Dps family protein	-3.54508	NA		-1.52975	NA		2.93344	NA
EF0607	ParB-like nuclease domain protein	-1.01004	0.891356		-1.03805	0.511481		-1.04378	0.510175
EF0608	hypothetical protein	1.11634	0.247402		1.17036	NA		-1.04942	0.474758
EF0609	conserved hypothetical protein	1.11275	0.0865634		1.13868	0.0776976		1.22203	0.00148055
EF0610	hypothetical protein	-1.01956	0.771182		1.07108	0.456856		1.30773	0.000716787
EF0611	hypothetical protein	-1.33994	NA		-1.18879	NA		-1.38233	NA
EF0612	hypothetical protein	1.24285	NA		-1.38121	NA		NA	NA
EF0613	hypothetical protein	-1.13964	0.111662		1.11351	0.127056		1.36533	0.00198018
EF0615	transposase, IS200 family	1.83752	NA		1.45027	NA		-1.29057	NA
EF0616	ornithine cyclodeaminase, putative	-1.10939	0.189275		-1.07981	0.215685		-1.07607	0.232383
EF0617	membrane protein, putative	-1.11098	0.241599		-1.18054	0.0440181		-1.08322	0.182545
EF0618	conserved hypothetical protein	-1.15277	0.113778		-1.09992	0.163281		-1.00215	0.969309
EF0619	hypothetical protein	-1.58643	NA		-1.03428	NA		1.23907	0.122662
EF0621	hypothetical protein	-1.15291	NA		-1.07668	NA		-1.4006	NA
EF0622	hypothetical protein	-1.73016	NA		-1.01817	NA		-1.66957	NA
EF0624	hypothetical protein	1.34514	NA		-1.01969	NA		1.25182	0.287873
EF0625	hypothetical protein	1.49622	0.0367378		-1.23833	NA		1.20663	0.172807
EF0626	hypothetical protein	2.20085	NA		-1.19198	NA		-1.58107	NA
EF0627	hypothetical protein	1.33725	0.187096		1.00143	NA		1.51611	0.0049749
EF0628	PTS system, IIA component, putative	-1.10365	NA		1.15086	NA		1.20526	NA
EF0629	oxidoreductase, aldo/keto reductase family	-1.07153	0.280489		-1.04166	NA		-1.00184	0.972217
EF0630	glyoxalase family protein	-1.09069	0.160708		1.07065	0.516129		-1.02039	0.733557
EF0631	cardiolipin synthetase, putative	-1.0765	0.13865		1.03011	0.562235		-1.05087	0.31759
EF0633	tyrosyl-tRNA synthetase	1.82704	6.51175e-05		-1.24264	0.0019471		1.14409	NA
EF0634	decarboxylase, putative	-1.22688	0.210657		-1.10509	0.102548		1.73819	5.65431e-10
EF0635	amino acid permease family protein	-1.27406	0.26375		-1.07718	0.31451		1.53422	9.80376e-09
EF0636	Na+/H+ antiporter	-1.75513	0.0738847		1.03615	0.641079		1.4974	1.1866e-06
EF0637	hypothetical protein	1.20442	0.00479139		-1.048	0.36733		-1.10493	0.042933
EF0638	conserved hypothetical protein	1.2545	0.0236082		-1.00458	0.952655		1.00248	0.978455
EF0639	low temperature requirement C protein, putative	1.16773	0.0244703		-1.02528	0.634856		1.15901	0.0243225
EF0640	hypothetical protein	-1.0385	NA		-1.23149	NA		-1.23504	NA
EF0641	L-lactate dehydrogenase	-1.25361	NA		1.00422	0.962644		-1.17158	NA
EF0642	hypothetical protein	-1.00842	0.91041		-1.4218	0.0516132		-1.16662	0.0314739
EF0643	hypothetical protein	1.06038	0.444704		-1.24911	NA		-1.06732	0.34839
EF0644	transcriptional regulator, LysR family	1.07663	0.516978		-1.09141	0.301221		-1.17042	0.0740885
EF0645	exfoliative toxin A, putative	-1.40993	0.017392		-1.27824	NA		-1.06148	0.687839
EF0646	NAD-dependent epimerase/dehydratase family protein	-1.44006	0.014478		-1.12251	NA		-1.05391	0.5134
EF0647	conserved hypothetical protein	1.0503	0.571772		-1.05372	0.58972		1.26679	0.0366928
EF0648	nitroreductase family protein	-1.41227	NA		-1.04183	NA		-1.12178	NA
EF0650	lipoate-protein ligase A	1.05073	0.551822		1.05544	0.399515		1.17445	0.0329174
EF0652	hypothetical protein	1.12976	0.173063		1.00888	0.915501		-1.14017	0.0458881
EF0653	hypothetical protein	1.22953	0.0135251		-1.05481	0.379954		-1.11551	0.180549
EF0654	sugar-binding transcriptional regulator, LacI family	1.23353	0.00944068		-1.07821	NA		-1.21228	0.00383499
EF0655	nitroreductase family protein, putative	-1.08766	0.32391		-1.0718	NA		-1.20074	0.0134953
EF0656	glyoxalase family protein	-1.14376	0.144702		-1.05122	0.547088		-1.05786	0.451486
EF0657	transcriptional regulator, DeoR family	-1.16264	0.0327769		-1.05056	0.483079		-1.20246	NA
EF0658	conserved hypothetical protein	-1.04898	0.507038		-1.11923	0.0798903		-1.19486	0.00271129
EF0659	phage SPO1 DNA polymerase-related protein, putative	1.0237	0.704645		-1.01787	0.76294		-1.06035	0.284086
EF0660	MATE efflux family protein	-1.09296	0.419566		1.0167	0.884083		-1.07247	0.3351
EF0661	oligoendopeptidase F, putative	1.48108	0.000486641		-1.02762	0.724087		1.15717	0.00446006
EF0662	conserved hypothetical protein	-1.00236	0.976134		1.05579	0.551386		1.41578	0.0011139
EF0663	conserved hypothetical protein TIGR01033	1.1295	0.045511		1.00604	0.919919		-1.00815	0.880021
EF0664	hypothetical protein	1.22922	0.0185774		1.13333	0.158469		-1.37531	0.0381944
EF0665	hypothetical protein	1.08489	0.194598		1.09818	0.216961		1.3031	9.66117e-05
EF0666	glyoxalase family protein	1.13675	0.0231247		-1.0676	0.237681		-1.12888	0.00975272
EF0667	conserved hypothetical protein	1.52272	0.000112771		-1.07569	0.339627		1.22365	0.0266957
EF0668	UDP-N-acetylmuramoylalanyl-D-glutamate diaminopimelate ligase	1.02387	0.660932		-1.03822	0.46645		1.02548	0.590887
EF0669	polysaccharide biosynthesis family protein	1.18379	0.00327605		1.01294	0.85774		-1.00519	0.91784
EF0671	xaa-his dipeptidase	1.18832	0.00703788		1.05986	0.453943		-1.13646	0.00488982
EF0672	hypothetical protein	-1.24586	0.018569		-1.12194	0.260315		1.13517	0.243183
EF0673	membrane protein, putative	1.35346	0.00318835		1.0341	0.68574		1.35561	0.0530972
EF0674	glycine betaine/carnitine/choline ABC trans, ATP-binding protein	1.12133	0.107031		1.13674	0.0933702		-1.10677	0.0613603
EF0675	glycine betaine/carnitine/choline ABC trans/binding protein	1.21336	0.00645311		1.01431	0.775216		-1.13773	0.020077
EF0676	arginine repressor	1.03189	0.638033		-1.02487	0.675028		-1.22838	0.000688753
EF0677	phosphoglucomutase/phosphomannomutase family protein	1.17954	0.0133321		1.05849	0.370231		-1.49852	2.57603e-05
EF0678	acetyltransferase, GNAT family	1.2354	0.00279652		-1.02029	0.764243		-1.21062	0.00331506
EF0680	penicillin-binding protein 2A	1.38174	8.40125e-05		-1.03631	0.465964		1.12228	0.0256867
EF0681	conserved hypothetical protein	-1.03036	0.625127		1.01801	0.702606		-1.13072	0.00386761
EF0682	DNA repair exonuclease family protein	-1.00852	0.881247		-1.1385	0.0717202		-1.23962	0.000873617
EF0683	conserved hypothetical protein	-1.06021	0.358699		1.0219	0.636133		-1.22266	0.000355902
EF0684	cmp-binding protein, putative	-1.06692	0.226019		1.1865	0.0317564		1.02632	0.595719
EF0685	rotamase family protein	1.62217	5.10462e-08		1.01875	0.71627		1.01276	0.77195
EF0686	hypothetical protein	1.09302	0.147219		-1.03437	0.498307		-1.20249	0.00156065
EF0687	HIT family protein	1.11124	0.127449		-1.01493	0.820999		-1.05988	0.236479
EF0688	ABC transporter, ATP-binding protein	1.11218	0.0880446		1.03174	0.602179		1.14598	0.00790097
EF0689	membrane protein, putative	1.02845	0.670338		-1.08076	0.133223		1.14614	0.00652485
EF0690	conserved hypothetical protein	-1.07148	0.308968		1.0179	0.7202		1.07421	NA
EF0691	methyltransferase, putative	1.01103	0.870634		1.13808	0.157665		1.01995	0.70779
EF0692	phosphosugar-binding transcriptional regulator, RpiR family, putative	1.06342	NA		-1.06662	0.452164		1.38557	NA
EF0693	1-phosphofructokinase	1.12502	NA		1.20023	NA		-1.32148	NA
EF0694	PTS system, fructose-specific family, IIBC components	-1.5291	NA		2.2918	NA		1.25133	NA
EF0695	PTS system, IIA component	-1.6003	NA		-1.06321	NA		1.03749	NA
EF0696	tagatose 1,6-diphosphate aldolase	1.09408	NA		1.53007	NA		1.01401	NA
EF0697	conserved hypothetical protein	-1.05552	0.421017		-1.06882	0.322047		1.27598	7.03031e-05
EF0698	acetyltransferase, GNAT family	1.10364	0.278861		1.01372	0.836424		1.12481	0.188648
EF0699	conserved hypothetical protein	-1.10092	0.164638		1.06093	0.224603		1.15055	0.0901888
EF0700	hemolysin	1.0802	0.202946		-1.03536	0.481414		1.10719	0.0819746
EF0701	peptide chain release factor 3	-1.19051	0.0122391		1.09194	0.0792314		-1.08665	0.0887939
EF0702	conserved hypothetical protein	1.02142	NA		-1.1313	0.134375		-1.08008	0.281885
EF0703	conserved hypothetical protein	-1.09562	0.214006		1.02782	0.650584		-1.023	0.677608
EF0704	lipoprotein, putative	-1.43344	0.0248261		1.00827	0.880646		-1.12683	0.0555936
EF0705	conserved hypothetical protein	1.74735	0.00188759		1.00912	0.914495		1.50016	0.0106402
EF0706	ATP-dependent Clp protease, ATP-binding subunit ClpE	1.15959	0.0400615		-1.03674	0.491182		-1.22078	0.000503821
EF0707	hypothetical protein	1.25439	NA		-1.06502	NA		-1.26607	NA
EF0708	conserved hypothetical protein	1.0738	0.251514		1.03552	0.635267		1.24911	0.000567943
EF0709	phosphocarrier protein HPr	1.15661	0.0930869		1.02141	0.815249		-1.09505	0.130049
EF0710	phosphoenolpyruvate-protein phosphotransferase enzyme I	1.18315	0.019492		-1.01092	0.841143		-1.07753	0.166304
EF0711	conserved hypothetical protein	1.18223	NA		1.07309	0.373265		1.32236	0.000965402
EF0713	conserved hypothetical protein	1.28141	NA		1.15737	0.0670383		1.03634	0.818381
EF0714	hypothetical protein	-1.5279	0.00242828		1.38037	0.104125		1.28341	0.0198181
EF0715	trigger factor	1.10329	0.142441		1.10728	0.0899626		-1.10848	0.215125
EF0716	conserved hypothetical protein	-1.19153	0.0260386		1.13961	0.0568064		-1.13617	0.0279082
EF0717	PTS system, fructose-specific family, IIABC components	1.16378	0.235926		-1.00952	0.903219		1.23087	0.0188852
EF0718	1-phosphofructokinase	1.49261	0.0427322		-1.18666	0.100711		-1.10891	0.341909
EF0719	transcriptional regulator, DeoR family	1.4089	0.0144602		-1.48066	0.00147552		-1.78587	0.00600788
EF0720	voltage-gated chloride channel family protein	-1.21602	0.0180826		-1.0998	0.0895203		1.06339	0.404814
EF0721	ATP-dependent DNA helicase PcrA	1.1935	0.182528		1.20849	0.00835917		1.294	0.0196468
EF0722	DNA ligase, NAD-dependent	1.02099	0.731734		1.04262	0.426556		-1.01493	0.76036
EF0723	hypothetical protein	-1.78115	0.00230208		-1.02328	0.794987		1.03308	0.530225
EF0724	glutamyl-tRNA(Gln) amidotransferase, C subunit	1.00503	0.928405		1.02709	0.608995		1.03343	0.541188
EF0725	glutamyl-tRNA(Gln) amidotransferase, A subunit	-1.12005	0.0894204		-1.08651	0.220642		-1.15553	0.00556574
EF0726	glutamyl-tRNA(Gln) amidotransferase, B subunit	-1.14281	0.0999945		-1.04038	0.442595		-1.12699	0.0173661
EF0727	diacylglycerol kinase catalytic domain protein	1.01202	0.868939		-1.04841	0.344324		-1.01862	0.718909
EF0728	RNA methyltransferase, TrmA family	-1.19893	0.0120442		1.03107	0.503728		-1.23101	0.000871191
EF0730	conserved hypothetical protein	1.9885	NA		1.42053	NA		1.13838	NA
EF0731	transcriptional regulator, luxR family	1.09222	NA		-1.09494	0.154174		1.02072	0.749582
EF0732	ornithine carbamoyltransferase	1.54295	NA		1.00168	NA		-1.14902	NA
EF0733	amino acid permease family protein	1.48932	NA		1.01014	NA		1.22986	NA
EF0734	conserved hypothetical protein	1.38083	NA		1.08637	0.292352		-1.14218	0.298174
EF0735	carbamate kinase	1.32912	NA		-1.01539	NA		-1.07882	NA
EF0737	amidase, putative	1.27615	0.0164324		-1.02884	NA		1.28505	0.000158806
EF0738	hypothetical protein	1.10753	NA		-1.5928	NA		-1.19992	NA
EF0739	nicotinamide mononucleotide transporter PnuC, putative	1.56796	8.10583e-06		-1.11153	0.331899		1.40331	1.63967e-05
EF0740	deoxynucleoside kinase	1.30408	0.000964692		-1.20417	0.00512957		1.1903	0.00462114
EF0741	conserved domain protein	-1.11952	0.306901		-1.08556	0.166804		-1.05698	0.450443
EF0742	conserved hypothetical protein	-1.33218	0.000256119		1.10318	0.12973		-1.03861	0.396984
EF0743	hypothetical protein	1.1241	0.301362		-1.08908	0.283702		-1.02543	0.822081
EF0744	sodium/dicarboxylate symporter family protein	1.65637	1.52295e-06		1.08726	0.216611		-1.33754	6.24353e-05
EF0745	glyoxalase family protein	1.02387	0.700777		1.08028	0.117817		-1.02529	0.653526
EF0746	penicillin-binding protein, putative	1.08788	0.420479		-1.17911	0.0748493		1.32043	9.303e-05
EF0747	conserved hypothetical protein	1.10963	0.139844		-1.09559	0.260009		1.17902	0.00136274
EF0748	rhodanese family protein	1.23072	0.00499397		1.19333	0.00341532		1.0843	0.0531667
EF0750	cell wall surface anchor family protein	1.58721	0.129124		1.0408	0.711272		1.11043	0.322681
EF0751	conserved hypothetical protein	-1.39061	NA		-1.15692	0.176659		-1.20087	0.129748
EF0752	conserved hypothetical protein	1.13656	0.202837		-1.55998	NA		1.0633	0.468036
EF0753	hypothetical protein	1.15227	0.282123		-1.24036	NA		1.02898	0.743371
EF0754	conserved hypothetical protein	1.33346	0.0834001		-1.19544	0.0879015		1.09045	0.318311
EF0755	conserved hypothetical protein	1.28895	NA		-1.18903	NA		-1.33469	NA
EF0756	hypothetical protein	1.43173	0.0273031		-1.11584	NA		-1.18925	0.120035
EF0757	hypothetical protein	1.51969	0.0271264		-1.04754	NA		-1.2608	NA
EF0758	cadmium-translocating P-type ATPase	40.4645	1.51656e-12		-1.0885	0.30111		-1.2311	0.00382562
EF0759	sapB protein, putative	48.9114	1.11022e-16		-1.06389	NA		-1.25019	0.00490116
EF0760	amino acid ABC transporter, ATP-binding protein	-1.08336	0.394499		-1.26067	0.0302835		-1.13629	0.00193279
EF0761	amino acid ABC transporter, amino acid-binding/permease protein	1.05557	0.502335		-1.1086	0.143348		1.06988	0.155191
EF0762	excinuclease ABC, subunit B	-1.035	0.549169		1.05096	0.335188		-1.06589	0.136429
EF0763	excinuclease ABC, subunit A	-1.10883	0.106935		1.09664	0.130553		-1.24215	4.8148e-05
EF0764	hypothetical protein	-1.2433	NA		1.05311	NA		-1.83193	NA
EF0765	hypothetical protein	-1.71848	NA		1.28431	NA		-1.62099	NA
EF0766	conserved hypothetical protein	-1.02821	0.607355		-1.01956	0.698721		-1.05461	0.259425
EF0767	conserved hypothetical protein	-1.10224	0.103945		1.04462	0.407788		-1.07539	0.0930368
EF0768	conserved hypothetical protein	-1.03302	0.685443		1.01699	0.703381		-1.04872	0.222279
EF0769	conserved hypothetical protein	-1.24395	0.00127517		-1.05297	0.394099		-1.45848	5.83947e-06
EF0770	conserved hypothetical protein	1.2414	0.00249707		-1.01347	0.817667		1.0784	0.160752
EF0771	ATP-dependent Clp protease, proteolytic subunit ClpP	1.04673	0.452551		-1.05965	0.29971		1.01695	0.736595
EF0773	conserved hypothetical protein	-1.10806	0.0796121		1.1251	0.296955		1.01995	0.794437
EF0774	conserved hypothetical protein	1.0988	0.28075		-1.07312	0.222739		1.09858	0.302285
EF0775	gram positive anchor protein, putative	1.25865	0.0735491		1.03184	0.773426		1.66507	0.00197785
EF0776	hypothetical protein	1.36757	NA		-1.32453	NA		NA	NA
EF0778	hypothetical protein	6.93611	4.44089e-16		1.01263	0.793256		-1.17318	0.00856234
EF0779	glycerophosphoryl diester phosphodiesterase family protein	5.87079	7.40519e-13		-1.00723	0.896894		-1.09915	0.0601049
EF0780	MutT/nudix family protein	6.34927	2.22045e-16		-1.03622	0.454338		-1.07601	0.0520336
EF0781	cold shock domain family protein	1.83759	9.51251e-09		1.07271	0.414827		-1.49517	4.04305e-06
EF0782	RNA polymerase sigma-54 factor	-1.16127	0.0249286		-1.11362	0.13864		1.04142	0.476132
EF0783	acyltransferase, putative	1.13264	0.0739278		-1.05298	0.413545		1.27169	3.80397e-05
EF0784	S-adenosylmethionine synthetase	-1.25577	0.000591391		-1.06638	0.309294		1.10933	0.0217088
EF0785	drug resistance transporter, EmrB/QacA family protein	1.07892	0.216779		-1.03884	0.54633		1.11933	0.0106862
EF0786	tributyrin esterase, putative	-1.38709	0.203068		1.18491	NA		1.42941	NA
EF0787	transcriptional regulator, TetR family	-1.0978	0.337481		-1.10118	0.163535		1.30245	0.00165914
EF0789	ABC transporter, ATP-binding/permease protein	-1.6181	2.03169e-06		1.00742	0.903606		-1.07244	0.198459
EF0790	ABC transporter, ATP-binding/permease protein	-1.5493	2.37872e-05		1.07695	0.329047		1.00134	0.982778
EF0791	transcriptional regulator, TetR family	1.03958	0.568113		-1.08785	0.24527		-1.01824	0.721141
EF0792	permease domain protein	-1.1096	0.259174		-1.25769	0.0163256		-1.38778	NA
EF0793	ABC transporter, ATP-binding protein	1.0634	0.654056		-1.00357	NA		-1.69702	NA
EF0794	conserved hypothetical protein	-1.21807	0.0258496		1.03371	0.726378		1.07239	0.0847834
EF0795	conserved hypothetical protein TIGR01212	-1.17241	0.0343681		-1.10575	0.0738578		1.06566	0.12929
EF0796	type 2 phosphatidic acid phosphatase family protein	-1.10341	0.276979		-1.03018	0.546725		1.07878	0.105633
EF0797	conserved domain protein	1.76245	1.72783e-08		-1.15831	0.00743415		1.29261	3.60026e-05
EF0798	hypothetical protein	1.54721	1.27451e-06		-1.00878	0.889827		1.61058	9.85832e-09
EF0799	autolysin	1.34981	0.000122326		-1.07836	0.199372		-1.28505	4.35113e-05
EF0801	leucyl-tRNA synthetase	-1.05864	0.294508		-1.08572	0.273004		-1.15904	0.00104063
EF0802	hypothetical protein	-1.50319	0.000174466		-1.07358	0.491301		1.01097	0.876946
EF0803	conserved hypothetical protein	-1.60479	8.40088e-05		-1.13469	0.125768		-1.1932	0.0354142
EF0804	amino acid ABC transporter, amino acid-binding protein	1.10089	0.171075		-1.23908	NA		-1.48393	0.000150054
EF0805	amino acid ABC transporter, ATP-binding protein	1.16788	0.032751		1.0445	NA		-1.46247	5.34682e-05
EF0806	amino acid ABC transporter, permease protein	-1.13924	0.469061		-1.24563	0.0229351		-1.24596	0.00251791
EF0807	pheromone binding protein, putative	1.06601	0.284367		-1.12903	0.0515709		-1.13076	0.00851119
EF0808	hypothetical protein	1.12227	0.108633		1.06605	0.341326		1.08071	0.0902865
EF0809	membrane protein, putative	1.30866	0.000787209		1.04708	0.394442		1.55182	9.13367e-06
EF0810	conserved hypothetical protein	1.42087	0.000546351		-1.14365	0.051027		1.21781	0.0189978
EF0811	hypothetical protein	1.53637	0.000158181		-1.06515	0.342614		1.14615	0.174912
EF0812	glucuronyl hydrolase, putative	1.04014	0.671282		-1.11885	0.116751		-1.20969	NA
EF0813	glycosyl hydrolase, family 35	1.20474	0.0257219		-1.13205	0.0658597		-1.25564	0.0331717
EF0814	transcriptional regulator, GntR family	1.14842	0.0683213		1.03529	0.613724		1.05131	0.478221
EF0815	PTS system, IIAB components	-1.30095	0.280269		-1.04801	0.635934		-1.12264	NA
EF0816	PTS system, IIC component	1.79829	0.113248		1.06197	0.471343		-1.45983	NA
EF0817	PTS system, IID component	1.11567	NA		1.02836	0.787094		-1.39344	NA
EF0818	polysaccharide lyase, family 8	1.03471	NA		-1.27502	NA		1.1345	NA
EF0819	conserved hypothetical protein	1.16229	0.0649313		1.02779	0.700125		-1.02072	0.751897
EF0820	ribosomal protein L25	1.24473	0.0322576		-1.14664	0.419984		-1.12262	0.0607527
EF0822	hydrolase, haloacid dehalogenase-like family	1.08825	0.231094		1.09289	0.160476		-1.07851	0.161393
EF0823	hypothetical protein	-1.01633	NA		-1.30355	NA		-1.15767	0.179137
EF0824	acetyltransferase, GNAT family	1.53658	NA		1.31348	NA		1.3554	NA
EF0825	uridine kinase	1.12817	0.131909		1.0539	0.28545		1.10204	0.064081
EF0826	transcriptional regulator, PemK family	1.12624	NA		1.23437	NA		1.47813	NA
EF0827	oxidoreductase, Gfo/Idh/MocA family	1.04902	0.754954		-1.06642	0.364924		-1.07675	0.180146
EF0828	conserved hypothetical protein	1.41114	0.0251072		1.10607	0.149106		-1.06568	0.521737
EF0829	conserved hypothetical protein	1.25118	0.0440146		1.04618	0.562862		-1.19777	0.0324863
EF0830	conserved hypothetical protein	1.23586	0.0379231		1.02923	0.726099		-1.26169	0.0056566
EF0831	conserved hypothetical protein	-1.44935	0.158446		1.20046	0.426197		1.00551	0.969062
EF0832	conserved hypothetical protein	1.29135	0.0572487		-1.01335	0.885405		-1.29658	0.0473485
EF0833	conserved hypothetical protein	1.22252	NA		-1.03351	0.774948		-1.08017	NA
EF0834	PTS system, IIC component	-1.08475	0.553435		-1.09944	0.345086		-1.45137	0.00677996
EF0835	hypothetical protein	-1.03425	0.837738		-1.11559	0.287344		-1.38677	0.0204177
EF0836	conserved hypothetical protein	-1.29817	0.11009		1.07063	0.388622		1.09611	0.248391
EF0837	conserved hypothetical protein	-1.29271	0.077758		-1.08582	0.442959		1.87164	0.265423
EF0838	pyridoxal phosphate-dependent enzyme, putative	1.02721	NA		1.05785	0.565708		-1.1555	0.106089
EF0839	conserved hypothetical protein	-1.06601	NA		-1.02408	0.72631		-1.24761	0.0144931
EF0840	carbohydrate kinase, pfkB family	-1.02151	0.78992		-1.202	0.0187167		-1.21467	0.00409607
EF0841	conserved domain protein	-1.02483	0.743367		-1.0224	0.759847		-1.00007	0.998782
EF0842	YaiI/YqxD family protein	-1.0743	0.451215		-1.02506	0.620635		-1.14255	0.00899626
EF0843	D-alanine--D-alanine ligase	1.06519	0.243625		-1.01189	0.808171		1.11959	0.0276981
EF0844	hypothetical protein	-1.04573	NA		1.074	NA		-1.42326	NA
EF0845	UDP-N-acetylmuramoylalanyl-D-glutamyl-diaminopimelate- ligase	1.06618	0.275584		1.01136	0.79638		-1.01573	0.691098
EF0846	ATP-dependent RNA helicase, DEAD/DEAH box family	-1.47981	1.45692e-05		1.00426	0.935185		-1.05476	0.226758
EF0847	hypothetical protein	-1.32932	NA		-1.00998	NA		1.58375	NA
EF0848	holo-(acyl-carrier-protein) synthase	1.09839	0.121016		1.08204	0.247903		1.40738	9.38389e-05
EF0849	alanine racemase	1.17006	0.00474937		1.10921	0.0463286		1.40763	8.734e-06
EF0850	transcriptional regulator, PemK family	1.15564	0.0152024		1.21607	0.00124538		1.28463	0.000252393
EF0851	hypothetical protein	-1.41505	NA		1.02049	0.856028		-2.89946	NA
EF0852	hypothetical protein	-1.21394	NA		1.37449	0.168276		-1.26126	0.308296
EF0853	hypothetical protein	-1.18635	0.129147		-1.07102	NA		-1.64007	7.46135e-06
EF0854	signal peptidase I	-1.24946	0.0147345		-1.04793	NA		-1.518	3.4855e-05
EF0855	conserved domain protein	1.00009	0.999366		1.00713	NA		-1.09905	0.361006
EF0856	aldo/keto reductase family protein	-1.10326	0.190222		1.07377	0.299179		1.25926	0.0213124
EF0857	conserved hypothetical protein	-1.20455	0.00830612		1.13344	0.00580397		-1.10743	NA
EF0858	phage infection protein	-1.04847	0.547116		-1.00321	0.945861		-1.02937	0.540863
EF0859	cation efflux family protein	1.01014	0.891863		3.20547	5.4907e-08		1.45161	1.82436e-05
EF0860	membrane protein, putative	-1.7066	0.00122775		1.12641	0.0520331		1.24686	4.68823e-05
EF0861	acetyltransferase, GNAT family	-1.4107	0.009168		-1.23594	0.103818		-1.14316	0.132088
EF0862	glycine betaine/carnitine/choline ABC transporter, permease protein	-1.09375	0.0765804		-1.096	0.206285		1.11951	0.00887373
EF0863	glycine betaine/carnitine/choline ABC transporter/binding protein	1.03694	0.535495		-1.22583	0.00420714		1.04356	0.331133
EF0864	glycine betaine/carnitine/choline ABC transporter, permease protein	-1.02129	0.715148		-1.10949	0.0399741		1.07283	0.199558
EF0865	glycine betaine/carnitine/choline transporter, ATP-binding protein	1.11162	0.080015		-1.13563	0.0427147		-1.04883	0.259841
EF0867	glyoxalase family protein	1.14674	0.18001		-1.09407	0.198025		-1.13509	0.153881
EF0868	S-adenosylmethionine:tRNA ribosyltransferase-isomerase	-1.09138	0.301709		1.0135	0.769572		-1.05878	0.123419
EF0869	transcriptional regulator, Cro/CI family	-1.15215	0.0658471		1.09488	0.263015		1.41554	3.53079e-06
EF0871	cation-transporting ATPase, E1-E2 family	1.04142	0.538738		1.06326	0.211412		-1.45735	2.94949e-07
EF0872	potassium uptake protein	-1.1169	0.562205		-1.08872	0.0603032		1.41819	4.83583e-05
EF0873	transcriptional regulator, Cro/CI family	1.37009	NA		-1.08977	NA		1.78927	NA
EF0875	copper-translocating P-type ATPase	1.11246	0.111858		-1.08122	0.118666		-1.03465	0.488853
EF0876	hypothetical protein	1.2985	0.0409085		-1.01421	NA		1.03788	0.647237
EF0877	oxidoreductase, aldo/keto reductase 2 family	1.0294	0.668707		-1.01042	0.929144		-1.12233	0.062494
EF0878	DNA polymerase I	1.07849	0.318764		1.02925	0.60466		1.12695	0.0222919
EF0879	formamidopyrimidine-DNA glycosylase	1.09376	0.167698		-1.01522	0.742431		-1.05411	0.316053
EF0880	dephospho-CoA kinase, putative	1.04759	0.440031		-1.00148	0.976127		-1.04688	0.303331
EF0881	conserved hypothetical protein TIGR00244	1.20678	0.0120681		-1.07659	0.127162		-1.04307	0.303571
EF0882	replication initiation and membrane attachment protein DnaB, putative	1.08519	0.138997		-1.10985	0.0316379		-1.00948	0.816272
EF0883	primosomal protein DnaI	1.01578	0.783219		-1.01872	0.687499		-1.11068	0.0274462
EF0884	conserved hypothetical protein	-1.02895	0.617581		-1.00478	0.928885		-1.06033	0.156773
EF0885	conserved hypothetical protein	-1.01947	0.744233		-1.00887	0.876645		1.06486	0.194771
EF0886	hypothetical protein	-1.1724	0.0133117		-1.00847	0.868764		-1.00161	0.974089
EF0887	glycosyl transferase, group 2 family protein	-1.26507	0.00105041		1.03009	0.826936		1.01064	0.833762
EF0888	conserved hypothetical protein	-1.2641	0.00252489		-1.36388	0.00817038		-1.00337	0.949167
EF0889	conserved hypothetical protein	-1.23706	0.00609026		-1.13736	0.034828		-1.01074	0.840611
EF0890	hypothetical protein	-1.27322	0.019744		-1.07982	0.540106		1.05988	0.386181
EF0891	aspartate aminotransferase, putative	-1.38209	0.000560341		-2.18655	1.49918e-05		2.13937	3.65204e-08
EF0892	amino acid ABC transporter, ATP-binding protein	-1.28679	0.00956082		-2.07327	2.38431e-05		2.27998	3.45572e-09
EF0893	amino acid ABC transporter, amino acid-binding/permease protein	-1.52004	1.43133e-05		-1.71793	4.01672e-06		2.18146	1.24698e-11
EF0895	glycerol dehydrogenase, putative	-1.21339	0.0159849		-1.71229	3.32414e-07		1.41559	NA
EF0896	queuine tRNA-ribosyltransferase	1.05168	0.513554		1.0178	0.755241		-1.09637	0.0300958
EF0897	preprotein translocase, YajC subunit, putative	1.08905	0.300099		1.09149	0.0979849		1.02071	0.611761
EF0898	hypothetical protein	-1.55514	NA		1.53015	NA		1.95403	NA
EF0899	conserved hypothetical protein	-1.05295	0.380575		1.07948	0.172524		1.02987	0.43518
EF0900	aldehyde-alcohol dehydrogenase	-2.00358	2.15957e-06		1.21496	0.00318383		-1.12407	0.115468
EF0901	isopentenyl diphosphate delta isomerase, putative	-1.1594	0.0405914		1.1035	0.206217		-1.00636	0.904337
EF0902	phosphomevalonate kinase	1.0072	0.937521		-1.03439	0.46168		-1.142	0.00438109
EF0903	mevalonate diphosphate decarboxylase	1.01884	0.738199		-1.0275	0.613374		1.05448	0.255136
EF0904	mevalonate kinase	1.1867	0.0459234		1.20331	NA		1.58951	0.000360646
EF0905	pentapeptide repeat family protein	1.13932	NA		1.06888	0.337915		1.04721	0.516214
EF0906	conserved hypothetical protein	-1.08174	0.594063		1.02329	0.778124		1.44969	NA
EF0907	peptide ABC transporter, peptide-binding protein	-1.66623	1.82148e-07		-1.19071	0.00168327		-1.36094	5.53061e-07
EF0908	conserved hypothetical protein	-1.47004	0.0625208		-1.52036	NA		-2.55197	NA
EF0909	peptide ABC transporter, permease protein	-1.39426	6.63008e-05		-1.24052	0.00105296		-1.24687	3.69554e-05
EF0910	peptide ABC transporter, permease protein	-1.36618	0.00273933		-1.15374	0.00882871		-1.23081	6.03695e-05
EF0911	peptide ABC transporter, ATP-binding protein	-1.26665	0.00228944		-1.07094	0.14282		-1.15185	0.0355
EF0912	peptide ABC transporter, ATP-binding protein	-1.12991	0.257111		-1.1166	0.106763		-1.10126	0.0761369
EF0913	transposase, putative	-1.28995	0.000236326		-1.16689	0.00339147		-1.25946	0.000117353
EF0914	translation initiation factor IF-3	-1.60332	0.000452386		-1.04519	0.472712		1.04272	NA
EF0915	ribosomal protein L35	-1.40274	0.000407039		1.05595	0.298056		1.11152	0.0306583
EF0916	ribosomal protein L20	-1.47196	0.000570511		1.10409	0.203563		1.18255	0.00087012
EF0917	conserved hypothetical protein	1.1246	0.232156		-1.03035	0.693624		1.08557	0.278667
EF0918	membrane protein, putative	-1.03732	0.539603		1.25098	9.61315e-05		1.04878	0.309773
EF0919	acetyltransferase, GNAT family	-1.07171	0.253127		1.11274	0.187059		-1.08862	0.0573049
EF0920	conserved hypothetical protein	-1.03255	0.5743		1.14196	0.0332085		-1.05357	0.229468
EF0921	sulfate transporter family protein	1.0273	0.724716		-1.21727	0.0525551		-1.05009	0.509569
EF0922	membrane protein, putative	-1.03691	0.595977		-1.12377	0.0708801		-1.07436	0.191555
EF0923	transcriptional regulator, LysR family	1.1629	0.0359352		1.11587	0.527565		-1.08624	0.108283
EF0924	conserved hypothetical protein	1.40751	0.000468181		-1.06034	0.337041		-1.10068	0.0631279
EF0925	hypothetical protein	1.02191	0.720094		1.05256	0.409161		1.11372	0.0714428
EF0926	DNA-binding response regulator	1.06005	0.261984		1.01095	0.825354		1.19058	0.00135605
EF0927	sensor histidine kinase	1.06336	0.304129		-1.01267	0.789953		1.19819	0.000585215
EF0928	glucose uptake protein	1.25781	0.0100342		1.0886	0.321676		1.16214	0.0434052
EF0929	amino acid permease family protein	-1.37088	0.0249589		-1.00728	0.904435		1.29334	0.00191425
EF0930	methionyl-tRNA synthetase	1.00739	0.893291		1.08374	0.213765		1.08071	0.0980695
EF0931	hypothetical protein	-1.01121	0.900765		1.16388	0.06631		1.05995	0.454287
EF0932	hypothetical protein	2.07011	4.84345e-07		-1.0863	0.187209		2.67261	1.24932e-06
EF0933	conserved hypothetical protein	-1.09121	0.578792		-1.01121	0.84472		-1.14075	0.0364792
EF0934	hydrolase, TatD family	1.01096	0.849311		-1.07182	0.243052		1.02276	0.634062
EF0935	primase-related protein	-1.02572	0.658736		-1.05055	0.24819		-1.0539	NA
EF0936	dimethyladenosine transferase	1.00493	0.936281		-1.07275	0.163129		-1.04712	0.33977
EF0937	conserved hypothetical protein	1.16071	0.198456		1.0214	0.827969		-1.3849	NA
EF0938	ABC transporter, ATP-binding/TOBE domain protein	1.16596	0.0181123		1.01123	0.929407		-1.68505	3.30168e-06
EF0939	methylglyoxal synthase	1.09935	0.222748		1.01785	0.75131		-1.10467	0.0665721
EF0940	conserved hypothetical protein	1.06503	0.275493		1.08177	0.232006		-1.15599	0.00400759
EF0941	ABC transporter, ATP-binding/permease protein	-1.03153	0.572852		-1.15907	0.00552624		-1.06212	0.21235
EF0942	ABC transporter, ATP-binding/permease protein	1.01324	0.813663		-1.15084	0.010807		1.01821	0.696904
EF0943	conserved hypothetical protein	1.22067	0.172298		-1.04278	0.493633		-1.1925	0.00342898
EF0944	extracellular protein, putative	-1.28697	0.000160796		1.05427	0.329671		-1.12535	0.0318423
EF0945	acetyltransferase, GNAT family	-1.31997	0.0328733		1.15516	0.12128		1.03478	0.513118
EF0946	conserved hypothetical protein	1.11878	0.0738623		1.08111	0.138355		-1.1446	0.0117424
EF0947	hydrolase, haloacid dehalogenase-like family	1.08806	0.137571		-1.03841	0.479447		-1.21213	0.000105163
EF0948	uracil-DNA glycosylase	-1.04074	0.657898		-1.02953	0.588534		-1.14731	0.0104387
EF0949	phosphotransacetylase	1.01529	0.798106		1.05788	0.428504		-1.11294	0.0144504
EF0950	conserved hypothetical protein TIGR00150	-1.08064	0.340203		1.02049	0.649681		1.12101	0.0296193
EF0951	acetyltransferase, GNAT family	-1.08896	0.336396		1.0078	0.878522		1.11378	0.0166937
EF0953	hypothetical protein	-1.11544	0.233297		1.46108	0.000109015		1.01004	NA
EF0954	sugar-binding transcriptional regulator, LacI family	1.05815	0.386121		-1.05694	0.305168		-1.03989	0.463592
EF0955	aldose 1-epimerase, putative	1.10496	NA		2.43689	NA		8.57665	NA
EF0956	beta-phosphoglucomutase	-1.22436	0.308033		-1.08442	0.369963		-1.06485	NA
EF0957	glycosyl hydrolase, family 65	-1.05276	0.732452		1.41784	0.0110195		1.2666	0.0961158
EF0958	PTS system, IIABC components	-1.23861	0.145496		1.12378	0.191914		-1.58332	NA
EF0959	hypothetical protein	1.08243	0.373253		1.04283	0.523423		1.04103	0.477997
EF0960	endonuclease/exonuclease/phosphatase family protein	-1.06993	0.456954		-1.00763	0.907821		-1.14533	0.332787
EF0961	pyrroline-5-carboxylate reductase, putative	1.35908	0.00856977		-1.09247	0.32305		-1.14149	NA
EF0962	transcriptional regulator, AraC family	1.04768	NA		1.06269	0.329446		1.10526	0.0755876
EF0963	hypothetical protein	1.11037	0.151833		1.08683	0.190084		1.06972	0.417876
EF0964	conserved hypothetical protein	1.05813	0.395445		1.04253	0.544388		-1.09564	0.34043
EF0965	conserved hypothetical protein	-1.77751	NA		-1.85107	NA		-3.85107	NA
EF0966	transcriptional regulator, MerR family	1.02031	0.798139		1.09669	0.148783		1.02738	NA
EF0967	conserved domain protein	-1.05819	NA		1.85089	NA		-1.25885	NA
EF0968	ribosomal protein L21	-1.34051	0.0026652		1.07224	0.355013		-1.06886	0.214001
EF0969	conserved hypothetical protein	-1.30645	0.00395381		1.18879	0.00865741		1.01064	0.780285
EF0970	ribosomal protein L27	-1.67557	0.000611487		1.11095	0.134246		1.01704	0.744183
EF0971	conserved hypothetical protein	1.07592	0.453025		1.23944	0.00019759		1.09423	0.311116
EF0972	DNA repair exonuclease family protein	-1.07682	0.38913		-1.03647	0.651063		1.54732	6.06186e-06
EF0973	proline dipeptidase	1.16829	0.0168899		-1.11305	0.0402738		-1.03716	0.413799
EF0974	conserved hypothetical protein	1.03807	0.517459		-1.00713	0.881496		1.16817	0.000733272
EF0976	conserved hypothetical protein	1.21679	0.0068589		1.02278	0.681823		-1.02807	0.609833
EF0977	N utilization substance protein B	-1.04663	0.499013		1.00919	0.89598		-1.01287	0.762242
EF0978	methylenetetrahydrofolate dehydrogenase	-1.04141	0.520255		1.1591	0.032113		-1.14245	0.0418634
EF0979	exodeoxyribonuclease VII, large subunit	-1.05215	0.493084		1.07534	0.152485		-1.14088	0.0237797
EF0980	exodeoxyribonuclease VII, small subunit	1.01666	0.785771		1.10471	0.0807801		-1.18339	0.00449351
EF0981	geranyltranstransferase	-1.03077	0.640701		1.03174	0.4927		-1.1187	0.0291325
EF0982	hemolysin A	1.07358	0.350684		1.03092	0.621111		-1.09532	0.037599
EF0983	transcriptional regulator, ArgR family	-1.06648	0.319392		-1.00237	0.967461		-1.05141	0.294635
EF0984	DNA repair protein RecN	-1.05682	0.350614		1.01431	0.784924		-1.53454	0.0289023
EF0985	hypothetical protein	-1.11891	0.167383		-1.00141	0.983503		1.20643	0.0247621
EF0986	cation transporter	1.32632	0.00221277		-1.06264	0.355339		1.22863	0.00123991
EF0987	lipoprotein, putative	1.63125	4.19205e-05		1.06467	0.302414		-1.00132	0.986511
EF0988	conserved hypothetical protein TIGR00242	-1.0097	0.859573		1.03347	0.47796		-1.04682	0.237083
EF0989	conserved hypothetical protein TIGR00006	-1.19738	0.00662316		1.03038	0.672857		-1.11805	0.028322
EF0990	cell division protein	-1.46157	3.87006e-05		1.08417	0.406475		-1.07076	0.151387
EF0991	penicillin-binding protein C	-1.25932	0.0482108		-1.0551	0.283556		-1.27853	9.87763e-06
EF0992	phospho-N-acetylmuramoyl-pentapeptide-transferase	-1.24373	0.0203209		-1.09049	0.0998132		-1.1498	0.00285057
EF0993	UDP-N-acetylmuramoylalanine--D-glutamate ligase	-1.50924	8.19532e-05		-1.08148	0.132594		-1.15171	0.00264962
EF0994	UDP-N-acetylglucosamine-N-acetylmuramyl pyrophosphoryl transf	-1.26994	0.000533771		-1.01339	0.775283		-1.12061	0.014104
EF0995	cell division protein FtsQ	-1.13457	0.127738		-1.02152	0.643592		-1.14046	0.00316666
EF0996	cell division protein FtsA	1.03768	0.504368		1.00162	0.974964		1.01132	0.822668
EF0997	cell division protein FtsZ	1.07916	0.211711		-1.06685	0.19967		-1.02299	0.631585
EF0998	conserved hypothetical protein TIGR00044	1.02381	0.700494		-1.02848	0.552181		1.15365	0.00478827
EF0999	conserved hypothetical protein	1.24749	0.00492282		1.03005	0.616047		1.25072	0.000415165
EF1000	conserved hypothetical protein	1.00354	0.965208		1.0643	0.397445		1.36847	5.19153e-05
EF1001	S4 domain protein	1.03885	0.619609		1.05227	0.304036		1.12302	0.113243
EF1002	cell division protein DivIVA	1.26718	0.00079843		1.03379	0.512804		1.13033	0.00719024
EF1003	isoleucyl-tRNA synthetase	1.11456	0.0697815		-1.03223	0.563269		1.04761	0.277574
EF1004	glucose-6-phosphate 1-dehydrogenase	-1.08935	0.256944		-1.1231	0.01192		-1.07189	0.202152
EF1005	iron-dependent repressor	-1.10629	0.111384		1.00566	0.899693		1.02124	0.728586
EF1006	conserved hypothetical protein	1.1782	NA		1.03124	0.654761		1.31414	0.0300909
EF1008	oxidoreductase, Gfo/Idh/MocA family	1.39362	2.11472e-05		-1.05521	0.280516		1.14274	0.00845404
EF1009	ATP-dependent RNA helicase, DEAD/DEAH box family	1.25629	0.00362085		-1.01902	0.673017		1.07676	0.10221
EF1010	sigma-54 interaction domain protein	1.27334	0.00337809		-1.01294	0.808875		1.14373	0.00653616
EF1013	PTS system, IIC component	1.032	NA		-1.00719	NA		-2.34095	NA
EF1014	hypothetical protein	-1.41072	NA		1.24618	0.116388		-1.19567	NA
EF1015	hypothetical protein	1.28853	NA		1.67384	NA		1.59167	NA
EF1016	conserved hypothetical protein	-1.07228	NA		-1.16934	NA		1.13914	NA
EF1017	PTS system, IIB component	-1.05224	0.433826		1.03121	0.795228		-2.22377	4.84127e-11
EF1018	PTS system, IIA component	1.05068	0.634803		-1.37526	0.162046		-3.72479	2.84657e-09
EF1019	PTS system, IIC component	1.64663	1.21587e-05		-1.06282	0.715846		-3.14759	2.23339e-05
EF1020	glycosyl hydrolase, family 1	1.58744	0.000594203		1.00386	NA		-1.2344	0.137393
EF1021	conserved hypothetical protein	1.23044	0.0129855		-1.08206	0.243307		-1.26574	0.000206579
EF1022	hypothetical protein	1.20302	0.0982608		1.01436	0.847871		1.00785	0.917857
EF1023	conserved hypothetical protein	-1.04688	0.74806		1.16326	0.0167294		1.18855	0.0153591
EF1024	pyruvate phosphate dikinase	1.57115	7.23219e-05		-1.00649	0.938213		1.17255	0.292716
EF1025	CBS domain protein	1.17286	0.137991		1.04805	0.495396		-1.18997	0.00274803
EF1026	conserved hypothetical protein	1.34866	0.000452104		1.08727	NA		-1.06976	0.230903
EF1028	hydrolase, alpha/beta hydrolase fold family	1.07205	0.450193		-1.09813	0.0662801		1.82402	4.1411e-10
EF1029	conserved hypothetical protein	1.17852	0.0127069		-1.12329	0.1632		-1.20891	0.00101631
EF1030	endonuclease/exonuclease/phosphatase family protein	1.10373	0.112152		-1.11414	0.114064		-1.18717	0.00180501
EF1031	phosphorylase family protein	1.05689	0.303649		1.06804	0.176332		1.02564	0.584867
EF1032	daunorubicin resistance protein	1.2443	0.012327		-1.20183	0.0128441		-1.06184	0.278448
EF1033	6-aminohexanoate-cyclic-dimer hydrolase, putative	1.23401	0.00326961		-1.08751	NA		-1.68787	1.01496e-06
EF1034	conserved domain protein	1.25854	0.00806244		-1.03596	0.617352		-1.06571	0.382485
EF1035	lipoprotein, putative	1.23512	0.00247018		1.02739	0.657299		-1.12593	0.0347018
EF1036	nucleoside diphosphate kinase	1.24793	0.00311599		-1.05287	0.535258		-1.22782	0.00151478
EF1037	L-aspartate beta-decarboxylase, putative	-1.03118	0.675305		-1.07687	0.175718		1.04127	0.343256
EF1038	lipoprotein, putative	-1.07375	NA		-1.10035	NA		1.05564	NA
EF1039	hydrolase, haloacid dehalogenase-like family	1.22114	0.00973048		1.08635	0.232771		1.1407	0.0182845
EF1040	conserved hypothetical protein	-1.07825	NA		-1.10384	NA		-1.01109	NA
EF1041	xanthine/uracil permeases family protein	1.56105	0.000507797		1.76569	0.000353952		-1.1064	0.292154
EF1042	multidrug resistance protein, putative	1.11268	0.18483		1.01932	0.84067		-1.02363	0.755566
EF1043	conserved hypothetical protein	1.0807	0.33036		1.00303	0.948955		1.07111	0.275252
EF1044	DNA polymerase III, alpha subunit	1.01921	NA		1.01282	0.847324		1.10431	0.392249
EF1045	6-phosphofructokinase	-1.16011	0.0483393		-1.05327	0.472192		-1.07619	0.119691
EF1046	pyruvate kinase	-1.10959	0.104997		-1.02696	0.68909		-1.15504	0.00329332
EF1047	conserved hypothetical protein	-1.21956	0.0113497		1.13848	0.0147436		1.14148	0.00221103
EF1048	ribosomal protein L32	-1.21641	0.00350984		1.25276	0.0109528		1.04862	0.263514
EF1049	6-phosphogluconate dehydrogenase, decarboxylating	1.28051	0.00227699		-1.01658	0.750393		1.0387	0.383666
EF1050	DNA-binding response regulator	1.00417	0.944893		-1.00039	0.995355		1.01796	0.691057
EF1051	sensor histidine kinase	-1.22033	0.0687594		-1.03726	0.558056		-1.04023	0.486973
EF1052	hypothetical protein	-1.67217	NA		2.8499	NA		-7.23779	NA
EF1053	ABC transporter, ATP-binding protein	1.90585	NA		-1.35135	0.00595478		2.09051	NA
EF1054	ABC transporter, permease protein	3.31676	NA		-1.50924	NA		2.38507	NA
EF1055	tunicamycin resistance protein, putative	1.06207	0.729946		-1.03397	0.725196		-1.06065	0.491902
EF1056	hypothetical protein	-1.07889	NA		-1.06879	NA		1.55924	NA
EF1057	Mn2+/Fe2+ transporter, NRAMP family	2.9699	3.04957e-10		-7.68585	7.50999e-12		-3.10297	3.84938e-05
EF1058	universal stress protein family	5.36281	9.54674e-11		-5.79525	NA		-3.77643	NA
EF1059	conserved hypothetical protein	1.23391	0.0268351		-1.07574	0.307974		1.01911	0.877527
EF1060	pheromone binding protein	1.15491	NA		1.27362	NA		1.09179	NA
EF1061	N-acyl-D-amino-acid deacylase family protein	1.7487	NA		#VALUE!	NA		2.27791	NA
EF1062	N-acyl-D-amino-acid deacylase family protein	#VALUE!	NA		173.856	NA		2.14686	NA
EF1063	conserved hypothetical protein	1.5966	0.0033778		-1.02323	0.697138		-1.03265	0.525925
EF1065	hypothetical protein	1.137	NA		1.64394	NA		-1.05583	NA
EF1066	hexapeptide-repeat containing-acetyltransferase	1.42354	0.00113609		1.21591	0.0256374		1.05811	0.458426
EF1067	hypothetical protein	2.10107	3.37226e-05		1.02619	0.811745		1.49766	4.5128e-05
EF1068	aldose 1-epimerase	1.29016	0.0122786		-1.08305	0.370734		-2.19534	NA
EF1069	galactokinase	1.75252	NA		1.79421	NA		-1.99067	0.0017784
EF1071	galactose-1-phosphate uridylyltransferase	-1.09067	0.332148		-1.08207	0.322162		-1.38771	0.0009853
EF1072	galactose operon repressor galR	1.07385	0.521409		-1.01563	0.749849		1.0988	0.0608694
EF1073	conserved hypothetical protein	-1.52462	NA		1.02451	0.723138		1.13797	0.0185814
EF1074	hypothetical protein	1.18075	0.0324876		1.00317	0.964271		-1.08348	0.20693
EF1075	acetyltransferase, GNAT family	1.38509	0.00311296		-1.04657	0.621835		-1.3327	0.000491773
EF1076	streptomycin 3-adenylyltransferase, putative	1.32375	0.00528824		-1.19211	NA		-1.61512	4.67574e-05
EF1077	acetyltransferase, GNAT family	1.32966	0.0482283		1.09929	NA		-1.09625	0.122485
EF1078	multidrug resistance protein, putative	-1.01241	0.852328		1.2771	0.00200207		-1.02344	0.62935
EF1080	ImpB/MucB/SamB family protein	-1.08423	0.266678		1.0293	0.702123		-1.10334	0.174666
EF1081	conserved hypothetical protein	-1.07903	0.330553		1.1614	0.0416657		-1.00845	0.874454
EF1082	hypothetical protein	9.98145	NA		1.29369	NA		-1.056	0.566594
EF1083	hypothetical protein	7.79139	1.04361e-14		1.13969	NA		-1.01644	0.761496
EF1084	universal stress protein family	7.29096	1.65423e-14		1.25664	0.0864006		1.08018	0.169452
EF1085	conserved domain protein	6.93376	2.55351e-15		1.11347	0.101201		1.13236	0.0931109
EF1086	spermine/spermidine acetyltransferase, putative	1.28519	0.0180233		1.07624	0.451571		-1.0517	0.441187
EF1088	conserved hypothetical protein	1.09616	0.213523		1.04475	0.514624		1.02914	0.584551
EF1089	conserved hypothetical protein	1.15235	0.257945		-1.17533	0.222466		1.05442	0.485604
EF1090	hypothetical protein	-1.0838	0.322834		-1.02986	0.631254		-1.00303	0.968277
EF1091	von Willebrand factor type A domain protein	-1.12483	NA		-1.02408	NA		-1.17857	NA
EF1092	cell wall surface anchor family protein	1.03136	0.82538		-1.16178	0.102012		-1.08992	0.239091
EF1093	cell wall surface anchor family protein	-1.08393	NA		-1.08108	NA		-1.13102	0.245553
EF1094	sortase family protein	-1.48925	0.00635484		-1.0695	0.470523		1.10153	0.339064
EF1095	hypothetical protein	-1.01072	0.871144		-1.06236	0.400205		1.22404	0.0252717
EF1096	conserved hypothetical protein	1.33266	0.00340639		-1.0561	0.537931		1.45345	0.000293123
EF1097	hypothetical protein	1.1785	0.0250374		1.07965	0.187598		1.37058	1.44996e-07
EF1098	conserved hypothetical protein	-1.37338	5.86226e-05		-1.03688	0.454915		1.16416	0.156619
EF1099	collagen adhesin protein	1.08842	NA		1.44448	NA		-1.02352	NA
EF1100	ABC transporter, ATP-binding/permease protein	1.26093	0.0114139		1.02788	0.751453		-1.15144	0.0661182
EF1101	conserved hypothetical protein	1.31821	0.0139116		-1.07555	0.316562		1.10862	0.0823154
EF1102	conserved hypothetical protein TIGR01655	1.07157	NA		1.07635	NA		3.3568	NA
EF1103	amino acid permease family protein	-1.33741	0.00316493		1.09345	0.187011		-1.34414	0.000887061
EF1104	conserved domain protein	-1.28968	0.00953264		-1.01946	0.867394		1.08346	0.296094
EF1105	hypothetical protein	1.02094	0.736774		1.08426	0.298331		1.10989	0.0582679
EF1106	hypothetical protein	-1.64826	NA		-1.03056	NA		-1.46663	NA
EF1107	hypothetical protein	1.11723	0.0951266		-1.30649	0.0190369		1.27453	0.00160412
EF1108	oxidoreductase, putative	1.03142	0.577315		-1.62292	1.14956e-05		1.15913	0.0225058
EF1109	iron-sulfur cluster binding protein	-1.04995	0.360281		-1.42296	2.35315e-06		1.10682	0.0111836
EF1110	YkgG family protein	1.11653	0.0532896		-1.56616	2.3186e-06		1.18026	0.000703279
EF1111	signal peptidase I	1.31153	0.00099596		1.07447	NA		1.06825	0.279983
EF1112	exonuclease RexB	-1.01708	0.784028		-1.16808	0.0371932		-1.18144	0.0011282
EF1113	exonuclease RexA	1.00236	0.963295		-1.13181	0.0521752		-1.19494	0.000225399
EF1114	conserved hypothetical protein	1.10574	0.144888		1.21581	0.00448204		1.0133	0.72578
EF1115	phenylalanyl-tRNA synthetase, alpha subunit	-1.23275	0.00133144		1.0285	0.639197		-1.00637	0.861911
EF1116	phenylalanyl-tRNA synthetase, beta subunit	-1.11144	0.142653		-1.00969	0.823468		-1.12928	0.00450694
EF1117	amino acid ABC transporter, permease protein	1.21788	0.00851752		-1.42076	0.000256192		-1.47573	9.86819e-05
EF1118	amino acid ABC transporter, permease protein	1.26806	0.00181806		-1.41891	0.000491588		-1.36581	0.000922765
EF1119	amino acid ABC transporter, amino acid-binding protein	1.31471	0.000688467		-1.28237	0.0139878		-1.42448	0.000684785
EF1120	amino acid ABC transporter, ATP-binding protein	1.1405	0.0830802		-1.18032	0.0393067		-1.24903	NA
EF1121	glutamate racemase	1.09231	NA		-1.03048	NA		-1.11489	NA
EF1122	ribonuclease PH/Ham1 protein	1.12424	0.0716895		-1.14994	0.0444908		-1.17726	0.00429632
EF1123	conserved hypothetical protein	1.08057	NA		-1.18829	NA		-1.27282	0.00285225
EF1124	transcriptional regulator, DeoR family	1.30103	0.0541878		-1.15927	0.400187		1.05639	NA
EF1125	conserved hypothetical protein	-1.02896	NA		1.12193	0.423643		-1.11265	0.373448
EF1126	PTS system, IIA component	1.31684	NA		1.08385	NA		-1.10299	NA
EF1127	putative transport protein SgaT protein	1.24191	NA		-1.12879	NA		1.63166	NA
EF1128	phosphotransferase enzyme II, B compnent SgaB	1.22397	NA		-1.07353	NA		1.02117	NA
EF1129	hexulose-6-phosphate synthase, putative	1.09075	NA		1.13009	0.201917		1.19227	NA
EF1130	hexulose-6-phosphate isomerase SgbU, putative	1.24529	NA		-1.29293	NA		1.04353	NA
EF1131	L-ribulose-5-phosphate 4-epimerase	1.17489	0.119172		-1.04217	NA		-1.03319	0.779623
EF1132	CBS domain protein	1.10008	0.0993865		1.0416	0.385411		1.08449	0.105937
EF1133	2,3,4,5-tetrahydropyridine-2,6-dicarboxylate N-succinyltransferase	1.10063	0.236763		-1.02585	0.637569		1.078	0.0883661
EF1134	peptidase, M20/M25/M40 family	1.40799	0.021989		-1.17844	0.00830466		1.01553	0.759682
EF1135	conserved hypothetical protein	1.19182	0.0358639		-1.03387	0.627421		1.06065	0.402622
EF1136	hypothetical protein	1.15119	NA		-13.0979	NA		#VALUE!	NA
EF1137	hypothetical protein	1.12862	0.0711775		-1.11717	0.0565205		1.04636	0.307851
EF1138	oxidoreductase, aldo/keto reductase family	1.41544	0.00267664		1.02799	0.670722		-1.00643	0.892593
EF1139	glutamine amidotransferase, class I	1.40852	0.0177027		1.31991	8.82057e-05		1.02517	0.693983
EF1140	lactoylglutathione lyase	1.19438	0.105565		1.18727	0.00326988		-1.02444	NA
EF1141	MutT/nudix family protein	1.14018	NA		1.06227	NA		1.74531	NA
EF1142	hydrolase, haloacid dehalogenase-like family	1.13431	0.0379761		-1.05738	0.28092		-1.04556	0.25857
EF1143	HD domain protein	1.06783	0.228192		-1.02429	0.590334		-1.25814	7.3777e-05
EF1144	lipoate-protein ligase A family protein, putative	-1.10619	0.0995111		-1.08796	0.191471		-1.15722	0.00646101
EF1145	conserved hypothetical protein	1.05823	0.273082		1.10097	0.0734602		1.07654	0.0740516
EF1146	DNA-directed RNA polymerase, delta subunit, putative	1.05213	0.419095		-1.01607	0.858229		-1.00813	0.840826
EF1147	CTP synthase	1.43856	0.00144884		1.13944	0.152821		1.13979	0.00549382
EF1148	penicillin-binding protein 1A	-1.15103	0.0760758		-1.01997	0.654284		-1.01161	0.780918
EF1149	recombination protein U	-1.29684	0.260373		1.37514	NA		-1.1527	NA
EF1150	conserved hypothetical protein	1.17302	0.0111632		-1.03688	0.599961		-1.12721	0.0354294
EF1151	cell division protein DivIVA, putative	-1.24064	NA		-1.00722	NA		-1.24539	NA
EF1152	conserved hypothetical protein	1.5843	NA		-1.30805	NA		1.35799	NA
EF1153	thermostable carboxypeptidase 1	1.17739	0.0674763		-1.04648	NA		-1.1568	0.0291934
EF1154	DNA replication protein DnaD, putative	-1.38969	NA		-1.07387	NA		-1.09741	0.29232
EF1155	endonuclease III	1.16155	0.0285262		-1.09361	0.17075		1.03595	0.42998
EF1156	transcriptional regulator, GntR family	1.06028	0.376231		-1.07174	0.227167		-1.1193	0.122773
EF1157	peptidase, M20/M25/M40 family	1.16996	0.0204974		-1.01233	0.846631		-1.07047	0.294697
EF1158	N4-(beta-N-acetylglucosaminyl)-L-asparaginase, putative	1.05622	NA		1.3439	0.235292		-1.24443	0.0574773
EF1159	PTS system, cellobiose-specific IIB component	1.33559	NA		1.20185	NA		-1.03137	NA
EF1160	PTS system, cellobiose-specific IIC component	1.12166	NA		-1.03792	0.720019		1.19247	0.329041
EF1161	conserved domain protein	-1.08305	NA		1.38613	NA		2.24011	NA
EF1162	helicase, putative	1.06639	0.401694		1.07536	0.29528		-1.23093	0.0125202
EF1163	L-asparaginase, putative	-1.0009	0.989898		1.01499	0.768988		-1.15993	0.117567
EF1164	HD domain protein	-1.09363	0.207498		1.04481	0.540019		-1.03484	0.505237
EF1165	conserved hypothetical protein	1.01578	0.834353		1.09967	0.20834		1.11594	0.1272
EF1166	YitT family protein	-1.06002	0.683258		1.08336	0.3555		1.08934	0.164077
EF1167	fructose-bisphosphate aldolase class-II	1.14263	0.11199		-1.07621	0.40119		1.21923	0.00641258
EF1168	hypothetical protein	-1.16569	NA		1.06385	0.59399		1.90615	0.111865
EF1169	UDP-N-acetylglucosamine 1-carboxyvinyltransferase 2	-1.1007	0.356477		1.04169	0.409585		1.38333	0.000142649
EF1170	transcription termination factor Rho	-1.41408	0.00688678		1.0102	0.831468		-1.00898	0.822554
EF1171	ribosomal protein L31	-1.23581	0.00134049		1.02564	0.643696		-1.04847	0.327061
EF1172	teichoic acid biosynthesis protein B, putative	1.25064	0.0582739		1.14845	0.0662576		1.15087	0.0309784
EF1173	glycosyl transferase, WecB/TagA/CpsF family	1.17927	0.205826		1.05757	0.739056		1.11701	0.166208
EF1174	hypothetical protein	-1.22981	0.199518		1.16982	0.0468488		1.63486	0.000408321
EF1175	glycerol-3-phosphate cytidylyltransferase	1.03591	NA		1.07497	0.302171		1.09155	0.280811
EF1176	conserved hypothetical protein	1.53854	NA		1.1412	NA		-1.34705	NA
EF1177	hypothetical protein	1.03735	NA		1.16701	NA		-1.11841	NA
EF1179	fructokinase	1.15477	0.281522		-1.06634	0.423779		-1.33942	NA
EF1180	conserved hypothetical protein	1.47939	0.000359454		1.23968	0.00038474		1.25547	0.00237158
EF1181	nitroreductase family protein	-1.08124	0.268562		1.1105	0.069705		1.05197	0.345562
EF1182	autoinducer-2 production protein LuxS	1.0758	0.260917		-1.06852	0.321078		1.04183	0.4655
EF1183	aspartate-semialdehyde dehydrogenase	1.3536	0.0208862		1.02247	0.715197		-1.13067	0.00820272
EF1184	dihydrodipicolinate synthase	1.12041	0.0903637		-1.05701	0.341595		-1.11308	0.079336
EF1185	metallo-beta-lactamase superfamily protein	1.23258	0.00246325		-1.0063	0.918382		-1.08537	0.0373264
EF1186	Ser/Thr protein phosphatase family protein	1.24293	0.00305798		-1.07154	0.268791		-1.03399	0.555484
EF1187	conserved hypothetical protein	1.03072	0.571515		1.04567	0.389161		-1.02524	0.574179
EF1188	hydrolase, haloacid dehalogenase family	-1.0072	0.898243		-1.01119	0.797158		-1.05009	0.204334
EF1189	conserved hypothetical protein	-1.12982	0.129936		1.13121	0.133996		1.05954	0.309883
EF1190	conserved hypothetical protein	1.08355	0.235839		1.34289	6.20632e-05		-2.09102	9.61153e-09
EF1191	DegV family protein	1.10438	0.134254		1.29002	0.000220196		-1.8107	8.67336e-07
EF1192	aquaporin Z	-1.56654	4.66701e-05		1.02007	0.690949		1.09699	0.0693674
EF1193	DNA-binding response regulator VicR	-1.08469	0.227208		1.04788	0.363748		-1.00871	0.806507
EF1194	sensory box histidine kinase VicK	-1.11078	0.0609678		-1.07998	0.093204		-1.06341	0.128414
EF1195	hypothetical protein	-1.37678	0.00163642		-1.10875	0.0584659		-1.14096	0.00845154
EF1196	conserved hypothetical protein	-1.25847	0.0156519		1.00412	0.947728		-1.01691	0.673874
EF1197	metallo-beta-lactamase YycJ	-1.15262	0.018282		-1.03244	0.621666		1.12014	0.00794561
EF1198	conserved hypothetical protein	1.10824	0.194904		-1.00582	0.924111		1.1026	0.1037
EF1199	conserved hypothetical protein	1.12661	0.0958111		-1.13103	0.0161917		1.23221	0.000236993
EF1200	membrane protein, putative	1.06527	0.439948		1.0055	0.933735		-1.05873	NA
EF1201	conserved hypothetical protein	1.10354	NA		1.01963	0.782449		1.06596	0.425194
EF1202	conserved hypothetical protein	1.04583	0.56519		1.06175	0.249961		-1.11288	0.0277132
EF1203	conserved hypothetical protein TIGR00250	1.08016	0.255665		1.06507	0.189948		-1.03442	0.519047
EF1204	conserved hypothetical protein	1.01986	0.797409		1.06505	0.320562		1.10074	0.0362712
EF1206	malate dehydrogenase, decarboxylating	1.01259	NA		-1.32342	NA		-1.18777	NA
EF1207	citrate carrier protein, CCS family	1.20836	0.239652		-1.07319	0.504201		-1.54581	NA
EF1209	sensory box histidine kinase	1.33103	NA		-1.28423	0.133558		-1.2366	NA
EF1210	response regulator	1.29708	0.0228933		1.02386	NA		-1.33681	0.00222676
EF1211	NADH peroxidase	1.02512	0.772578		-1.41813	2.60882e-05		-1.13984	0.0164598
EF1212	transcriptional regulator	-1.07823	0.429351		-1.02305	0.728158		1.04102	0.520871
EF1213	acetolactate synthase, catabolic	1.22651	0.00429053		-1.21087	NA		1.0044	0.926157
EF1214	alpha-acetolactate decarboxylase	1.39908	1.61771e-05		1.08325	0.0970427		1.03646	0.35369
EF1215	hypothetical protein	1.37643	0.000778595		1.04906	0.476532		1.38348	2.86578e-05
EF1216	hypothetical protein	1.33515	NA		-1.1143	NA		-1.22566	NA
EF1217	lipoprotein, putative	-1.27445	0.0211524		1.01808	0.845914		-1.11613	0.113366
EF1218	spermidine/putrescine ABC transporter, permease protein	2.57863	1.83053e-07		2.04729	0.00395536		-1.17388	0.215067
EF1219	spermidine/putrescine ABC transporter, permease protein	2.13307	0.000367509		2.48278	0.000454519		1.01187	0.901406
EF1220	spermidine/putrescine ABC transporter, ATP-binding protein	5.64269	NA		2.16899	NA		-1.0508	NA
EF1221	spermidine/putrescine ABC transporter/-binding protein	4.77452	7.51894e-08		2.65357	0.000288317		-1.59572	NA
EF1222	adenine deaminase	4.33746	NA		1.8658	0.000172036		1.39843	NA
EF1223	chlorohydrolase family protein	6.55039	NA		-1.02712	0.879938		1.9407	NA
EF1224	transcriptional regulator, Cro/CI family	1.04847	0.546561		-1.16703	0.0925825		1.09804	0.224006
EF1225	thiamin biosynthesis ApbE, putative	-1.41528	0.000466114		-1.21324	0.00537343		1.38784	1.91359e-07
EF1226	oxidoreductase, putative	-1.37218	0.00192293		-1.15768	0.00954898		1.40497	6.86197e-08
EF1227	conserved hypothetical protein	-1.31231	0.00216397		-1.112	0.0571571		1.40863	1.63908e-06
EF1228	hypothetical protein	1.93629	1.03372e-09		-1.16461	0.0288742		1.10895	0.0533568
EF1229	conserved hypothetical protein	1.87674	4.18741e-09		-1.03678	0.470664		1.08842	0.0944033
EF1230	hypothetical protein	1.81233	1.30578e-07		-1.09458	0.230119		1.16756	0.00836624
EF1231	conserved hypothetical protein	1.10597	NA		-1.01097	NA		1.122	NA
EF1232	ABC transporter, permease protein	1.3928	NA		1.79404	NA		-1.36045	NA
EF1233	ABC transporter, permease protein	1.6245	NA		1.44993	NA		2.00276	NA
EF1234	ABC transporter, substrate-binding protein, putative	1.09648	NA		-1.01907	NA		1.09017	NA
EF1235	hypothetical protein	1.39884	NA		-1.14748	NA		1.10837	0.372485
EF1236	acetyl xylan esterase, putative	1.18097	NA		1.01003	NA		-1.10375	NA
EF1237	conserved hypothetical protein	-1.89033	NA		1.09391	NA		-1.24321	NA
EF1238	glycosyl hydrolase, family 3	2.49074	NA		-1.19362	NA		-1.05489	NA
EF1239	conserved hypothetical protein	1.38779	0.132968		-1.09451	0.360395		-1.50609	0.0498189
EF1240	sugar-binding transcriptional regulator, LacI family	1.05309	0.399622		-1.0156	0.780728		1.0089	0.858703
EF1241	hypothetical protein	-1.0472	NA		1.11739	0.146413		-1.0357	0.601923
EF1242	transcriptional regulator, GntR family	1.04756	0.562842		1.01722	0.816788		-1.1218	0.19899
EF1243	glycosyl hydrolase, family 1	-1.23823	0.0157739		-1.06824	0.19676		1.06305	0.295223
EF1244	oxidoreductase, Gfo/Idh/MocA family	-1.30338	0.000782324		-1.02329	0.754827		1.10481	0.0780315
EF1246	conserved hypothetical protein	-1.04009	0.601899		-1.0425	0.567691		1.1082	0.131956
EF1247	conserved hypothetical protein	1.47074	0.00445468		1.12408	0.123981		1.28556	0.00329299
EF1248	hypothetical protein	1.06371	0.531931		1.1681	0.0162736		1.26398	0.00628946
EF1249	fibronectin/fibrinogen-binding protein, putative	-1.06889	0.289506		-1.22573	0.0100932		-1.09239	0.0509276
EF1250	hypothetical protein	1.03936	0.625998		1.09164	0.21956		-1.02989	0.509882
EF1251	hypothetical protein	1.02078	0.769478		1.06105	0.365832		1.00361	0.956057
EF1253	conserved hypothetical protein	-1.48899	0.031346		-1.03861	0.581576		-1.11324	0.226456
EF1254	ABC transporter, permease protein	-1.31738	0.0988106		-1.02117	0.76415		-1.07766	0.40849
EF1255	ABC transporter, ATP-binding protein	-1.20834	0.170749		-1.21197	0.0504212		-1.10382	0.220423
EF1258	hypothetical protein	1.0205	0.818136		1.19037	0.0264761		1.35355	0.000394665
EF1259	hydrolase, haloacid dehalogenase-like family	-1.13447	0.0402915		1.08533	0.0925812		-1.07852	0.087054
EF1260	DNA-binding response regulator	1.44538	0.000219669		1.07302	0.374133		1.05665	0.345868
EF1261	sensor histidine kinase	1.48492	4.94294e-06		1.01795	0.810293		-1.01115	0.813201
EF1262	hypothetical protein	6.60385	4.95826e-13		-1.25974	0.00170217		1.65864	NA
EF1263	hypothetical protein	6.72193	9.59869e-10		-1.11817	0.0989961		1.69103	6.55768e-07
EF1264	sulfatase domain protein	1.11212	0.180758		-1.15803	0.0258407		1.10668	0.0560332
EF1265	conserved hypothetical protein	1.05005	0.490331		1.11212	0.2279		-1.11599	0.115643
EF1266	hypothetical protein	-1.22142	NA		-1.18822	0.0638417		-1.29154	NA
EF1267	ribonuclease HIII	1.01798	0.771775		-1.21619	0.0726049		-1.11772	0.104859
EF1268	cation-transporting ATPase, E1-E2 family	1.15432	NA		-1.02448	NA		1.08669	NA
EF1269	cell wall surface anchor family protein	1.50239	0.0746547		-1.18815	NA		-1.27621	0.143283
EF1270	conserved hypothetical protein	-1.35004	0.00894435		1.0341	0.663801		-1.01946	NA
EF1271	N utilization substance protein A	-1.24673	0.000976532		-1.02427	0.630578		-1.05893	0.228525
EF1272	conserved hypothetical protein	-1.20148	0.0226162		1.06692	0.251948		-1.09747	0.0333213
EF1273	ribosomal protein L7A family	-1.16859	0.0515847		1.06024	0.310312		1.00423	0.92577
EF1274	translation initiation factor IF-2	-1.28912	0.00694884		1.02865	0.658629		-1.12004	0.144907
EF1275	ribosome-binding factor A	-1.6231	0.000256737		-1.02054	0.870953		1.09376	0.0940843
EF1276	conserved hypothetical protein	-1.05938	0.444332		-1.11784	0.0443213		-1.20788	0.00251396
EF1277	transcriptional regulator, Cro/CI family	-1.09976	0.237028		1.03598	0.47009		-1.21222	0.000943671
EF1278	hypothetical protein	-1.09606	0.604304		-1.03208	0.73756		1.10254	NA
EF1279	DNA replication protein, putative	1.30497	0.0213094		1.14278	0.353618		-1.22259	0.189178
EF1280	DNA replication protein, putative	1.0677	0.47945		-1.02371	0.773547		-1.24556	0.184299
EF1281	hypothetical protein	-1.046	NA		1.02475	0.766113		-1.11502	NA
EF1282	hypothetical protein	-1.00724	NA		1.07053	0.413658		-1.09059	0.137801
EF1283	transcriptional regulator, RinA family	1.00583	NA		1.02638	0.727312		1.0549	0.441323
EF1284	structural protein, putative	-1.07666	NA		-1.01621	0.830033		-1.04383	NA
EF1285	major tail protein	1.20699	0.0896464		-1.01533	0.845282		-1.2282	0.0341339
EF1286	conserved hypothetical protein	1.01924	0.836965		1.03823	0.582782		1.06112	NA
EF1287	conserved hypothetical protein	-1.42608	NA		1.06494	0.462008		1.12666	NA
EF1288	conserved hypothetical protein	-1.29602	0.0834014		1.2612	0.0496796		1.09455	NA
EF1289	tail protein, putative	1.07923	NA		-1.3505	0.0304322		1.00476	NA
EF1290	structural protein, putative	1.02269	NA		1.10997	0.485075		1.0075	NA
EF1291	hypothetical protein	-1.01883	0.901301		1.23424	0.0693664		1.4467	0.000535221
EF1292	holin, putative	1.04371	NA		-1.10691	NA		1.29313	NA
EF1293	endolysin	1.03432	NA		1.64227	NA		1.79939	NA
EF1295	riboflavin biosynthesis protein RibF	-1.15522	0.038599		1.17875	0.0106354		-1.03025	0.614032
EF1296	acetyltransferase, GNAT family	-1.25406	0.0373498		1.13142	0.0305406		-1.03375	NA
EF1297	transcriptional regulator, PadR family	1.03566	0.676707		1.05934	0.454305		1.08259	0.210804
EF1298	conserved hypothetical protein	-1.13084	0.0829797		1.07218	0.364373		1.09898	0.0741527
EF1299	conserved hypothetical protein	1.08157	0.436007		1.00873	0.897264		1.03405	0.524293
EF1300	cell division protein, FtsW/RodA/SpovE family	1.44059	5.27998e-05		1.05366	0.490648		1.18796	0.00332434
EF1301	cell division protein, FtsW/RodA/SpovE family	1.55709	2.87381e-05		-1.17802	0.025059		1.29924	0.00186135
EF1302	transcriptional regulator, putative	1.53691	7.88327e-05		1.25924	NA		1.17559	0.00646033
EF1303	transcriptional regulator, LysR family	1.42927	5.99451e-05		-1.2033	0.0229806		1.23036	0.00101718
EF1304	magnesium-translocating P-type ATPase	1.93038	1.18874e-07		-1.11995	0.188229		1.6299	2.16367e-06
EF1305	oxygen-independent coproporphyrinogen III oxidase, putative	1.39307	0.00463843		1.02045	0.737395		1.00082	NA
EF1306	heat-inducible transcription repressor HrcA	1.05686	0.351109		-1.07085	0.161252		-1.24107	0.0113494
EF1307	heat shock protein GrpE	-1.03228	0.614357		1.04889	0.464175		-1.37576	0.000371343
EF1308	dnak protein	1.17384	0.0149909		-1.06149	0.257826		-1.37271	0.000776866
EF1309	hypothetical protein	-1.08023	0.215355		-1.08075	0.114508		-1.17301	0.00300975
EF1310	dnaJ protein	1.01648	0.808144		1.04324	0.546734		-1.15361	NA
EF1311	conserved hypothetical protein	1.35437	0.00148234		1.00994	0.863955		-1.09104	0.152973
EF1312	S1 RNA binding domain protein	1.01887	0.81899		1.13071	0.050241		-1.21946	0.000142262
EF1313	conserved hypothetical protein	-1.25019	0.00193487		1.0304	0.784295		-1.05272	0.267559
EF1314	aspartate aminotransferase, putative	1.03394	0.517441		-1.04244	0.432949		1.06023	0.202121
EF1315	hypothetical protein	1.19503	0.0771354		-1.03023	0.722607		1.46188	0.000137267
EF1316	transcriptional regulator, Cro/CI family	1.0637	0.435581		1.00077	0.991186		-1.08664	0.0891374
EF1317	N-acetylglucosamine-6-phosphate deacetylase	1.07747	0.191183		1.05758	0.359224		-1.11668	0.0596313
EF1318	hypothetical protein	1.1671	0.0238063		1.00999	0.833471		-1.07161	0.119539
EF1319	conserved domain protein	1.29894	0.00181469		1.00075	0.990533		1.01187	0.863468
EF1320	ABC transporter, ATP-binding protein	1.06047	0.335228		-1.01603	0.747349		-1.09978	0.052558
EF1321	permease domain protein	1.13118	0.0763793		-1.0609	0.265418		-1.10579	0.0528199
EF1322	conserved hypothetical protein	1.2305	0.00495861		1.08576	0.358123		1.3418	0.000840534
EF1324	conserved hypothetical protein	-1.22654	0.0201525		1.34054	0.000475745		1.21862	0.00846061
EF1325	hypothetical protein	1.36501	0.0880299		1.23206	0.00164522		-1.21433	NA
EF1326	transcriptional regulator, TetR family	1.02092	0.699992		-1.01174	0.81015		-1.05471	0.275957
EF1327	BadF/BadG/BcrA/BcrD ATPase family protein	1.18647	0.0315159		-1.03047	0.575775		1.24343	0.000317847
EF1328	transcriptional regulator, GntR family	-1.04707	0.467955		1.1542	0.0900359		-1.12366	0.0613286
EF1329	HesA/MoeB/ThiF family protein	1.4349	NA		-1.33024	NA		1.88065	NA
EF1330	hypothetical protein	1.15017	NA		-1.08876	NA		2.01657	NA
EF1331	ABC transporter, ATP-binding protein	1.06561	NA		1.24722	NA		1.07991	NA
EF1332	membrane protein, putative	-1.21669	NA		1.3266	NA		1.44916	NA
EF1333	ABC transporter, ATP-binding protein	1.17389	NA		-1.18282	NA		-1.12504	0.584692
EF1334	AgrC domain protein	1.05492	0.509744		-1.05353	NA		-1.10109	0.303116
EF1335	sensor histidine kinase, putative	-1.00715	NA		-1.04327	NA		1.01498	0.899571
EF1336	response regulator	-1.03405	0.781903		1.27113	NA		1.23381	0.00803584
EF1337	conserved hypothetical protein	-1.01965	0.795743		-1.03749	NA		-1.07907	0.270015
EF1338	thioredoxin reductase	1.27132	0.00139477		1.15055	0.00420767		1.08933	0.0358906
EF1339	conserved hypothetical protein	1.02131	0.785184		-1.12866	NA		1.14114	0.0127053
EF1340	pheromone cAM373 precursor lipoprotein	1.0987	0.109242		1.01005	0.861396		1.21249	5.30231e-05
EF1341	ABC transporter, ATP-binding/permease protein	1.25055	0.00466787		-1.13272	0.0628355		-1.07114	0.168087
EF1342	transcriptional regulator, Mar family	-1.14254	0.152045		1.09485	0.104509		-1.00296	NA
EF1343	sugar ABC transporter, permease protein	1.3378	0.121187		1.07511	0.490492		-1.5439	NA
EF1344	sugar ABC transporter, permease protein	1.01335	0.915563		1.23669	0.0199121		-1.53531	NA
EF1345	sugar ABC transporter, sugar-binding protein	1.26808	0.0149297		1.19471	0.0729007		-1.42436	0.00703537
EF1346	hypothetical protein	1.79261	0.0128717		1.02974	NA		-1.54256	0.00666389
EF1347	glycosyl hydrolase, family 13	1.29184	NA		1.05406	NA		1.18499	NA
EF1348	glucan 1,6-alpha-glucosidase, putative	1.20597	0.0604487		1.126	0.0708637		-1.0781	0.352594
EF1349	glycosyl hydrolase, family 13	1.11342	0.186831		1.13901	0.117168		-1.14702	0.0908167
EF1350	conserved hypothetical protein	-1.03271	0.622592		-1.01626	0.74681		-1.00233	0.963992
EF1351	hypothetical protein	1.02267	0.701441		1.03278	0.579605		1.34699	0.00026271
EF1352	magnesium-translocating P-type ATPase	1.1386	0.0537061		1.07959	NA		1.29216	0.000444427
EF1353	pyruvate dehydrogenase complex E1 component, alpha subunit	1.64021	1.61596e-05		1.12757	0.108897		-1.13337	0.165209
EF1354	pyruvate dehydrogenase complex, E1 component, beta subunit	1.4517	0.000407006		1.02224	0.758477		-1.33859	0.00113483
EF1355	pyruvate dehydrogenase E2, dihydrolipoamide acetyltransferase	1.00049	0.995712		-1.031	0.721308		-1.25611	0.00661784
EF1356	pyruvate dehydrogenase E3, dihydrolipoamide dehydrogenase	1.17092	0.0183385		-1.02478	0.654332		-1.05354	0.322835
EF1357	transcriptional regulator, AraC family	1.15585	0.0798578		-1.13491	NA		-1.27472	0.000555094
EF1358	glycerol dehydrogenase, putative	1.54387	2.7419e-06		1.11259	0.0754222		-1.04499	0.582054
EF1359	conserved hypothetical protein	1.37542	6.53714e-05		1.04119	0.577174		-1.07244	0.297853
EF1360	dihydroxyacetone kinase family protein	1.40789	5.59315e-05		1.04288	0.427412		1.02144	NA
EF1361	dihydroxyacetone kinase family protein	1.48346	1.51452e-06		1.05347	0.360431		1.09063	0.043381
EF1362	conserved domain protein	1.0793	0.219113		-1.06857	0.338353		-1.05911	0.356491
EF1363	hydroxymethylglutaryl-CoA synthase	-1.09054	0.0848864		1.0427	0.353306		1.05149	0.177329
EF1364	acetyl-CoA acetyltransferase/hydroxymethylglutaryl-CoA reductase	1.15713	0.018576		-1.08877	0.123227		-1.05646	0.287431
EF1365	conserved hypothetical protein	1.14672	0.068413		1.02189	0.649486		1.28195	0.000153369
EF1366	conserved hypothetical protein	1.07291	0.381793		1.04774	0.631347		1.22268	0.000146368
EF1367	cold-shock domain family protein	-1.13145	0.0321784		1.19249	0.111506		-1.09051	0.0384385
EF1368	conserved hypothetical protein	1.77563	3.49669e-06		-1.02966	0.6455		1.31803	1.47153e-05
EF1369	transcriptional regulator, Cro/CI family	1.23959	0.0240456		-1.07577	NA		1.14371	0.213389
EF1370	drug resistance transporter, EmrB/QacA family protein	1.01785	0.819228		1.01654	0.839588		1.04205	0.600902
EF1371	conserved hypothetical protein	-1.00678	0.920446		1.0641	0.198435		-1.02767	0.53154
EF1372	CBS domain protein	1.12621	0.088914		1.02869	0.605335		-1.08283	NA
EF1373	DHH family protein	1.09978	0.127474		-1.0491	0.480744		-1.11242	0.044621
EF1374	phnA protein	-1.0598	0.362825		1.19823	0.0140738		1.05749	NA
EF1375	hypothetical protein	1.15547	0.0729799		-1.07253	0.245667		1.19933	0.0211844
EF1376	conserved hypothetical protein	-1.10154	0.316381		1.06611	0.461535		1.04034	0.662881
EF1377	ATP-dependent RNA helicase, DEAD/DEAH box family	-1.19149	0.0521496		1.15508	0.0557216		1.03473	0.416574
EF1378	transcriptional regulator, putative	1.00511	0.940425		1.01665	0.782594		-1.08353	0.184349
EF1379	alanyl-tRNA synthetase	1.03172	0.618218		-1.09738	0.120672		-1.07184	0.178242
EF1380	conserved hypothetical protein	-1.02765	0.620615		-1.08038	0.144006		-1.03283	0.401857
EF1381	conserved hypothetical protein TIGR00486	-1.04412	0.461395		-1.11811	0.121788		-1.0785	0.109323
EF1382	peptidase T	1.06751	0.24932		-1.13548	0.11653		-1.10856	0.019609
EF1383	membrane protein, putative	-1.44145	0.00486035		1.22812	0.00600485		1.34131	0.00208826
EF1384	membrane protein, putative	-1.58498	0.00626548		1.04678	0.654311		1.48929	0.00010945
EF1385	molybdopterin-guanine dinucleotide biosynthesis protein A, putative	-1.18875	NA		-1.04318	NA		1.46214	NA
EF1386	formate/nitrite transporter family protein	-1.16121	NA		-1.01031	NA		-1.11866	NA
EF1387	conserved hypothetical protein	1.05405	0.823103		-1.1943	NA		-1.16033	0.305005
EF1388	NAD-dependent formate dehydrogenase, gamma subunit, putative	-1.10915	NA		-1.0092	0.918774		1.06355	NA
EF1389	NAD-dependent formate dehydrogenase, beta subunit, putative	-1.16171	NA		1.37671	NA		-1.07699	NA
EF1390	NAD-dependent formate dehydrogenase, alpha subunit	1.30592	NA		-1.3253	0.201732		-1.68098	0.00824768
EF1391	molybdenum cofactor biosynthesis family protein	1.22279	NA		-1.04971	0.574235		-1.03305	NA
EF1392	molybdenum cofactor biosynthesis protein MoaC	1.41044	0.0193835		-1.01078	0.937245		-1.46546	NA
EF1393	molybdopterin cofactor biosynthesis protein A, putative	-1.07255	NA		1.67491	NA		-1.2397	NA
EF1394	conserved hypothetical protein	-1.06629	NA		1.10601	0.308477		1.45636	NA
EF1395	molybdenum cofactor biosynthesis family protein	-1.15202	NA		1.04631	NA		-1.90333	NA
EF1396	molybdenum cofactor biosynthesis family protein, putative	1.51791	NA		-1.1505	NA		1.17033	NA
EF1397	molybdenum ABC transporter, molybdenum-binding protein	-1.02564	NA		1.03144	NA		-2.15969	NA
EF1398	molybdenum ABC transporter, permease protein	2.08865	NA		1.09666	NA		-1.047	NA
EF1399	molybdenum ABC transporter, ATP-binding protein, putative	1.5355	0.00470727		1.0213	0.835228		1.08733	NA
EF1400	cadmium-translocating P-type ATPase	44.0064	0		1.50547	0.00125102		-1.26145	0.00146377
EF1401	hypothetical protein	2.60488	NA		-1.05008	NA		-1.70432	NA
EF1402	conserved domain protein	1.53011	2.52984e-06		1.13488	0.0607879		1.12493	0.0690224
EF1403	conserved hypothetical protein	1.7071	0.00277974		1.59502	0.00059769		1.8557	0.00808835
EF1404	MutS2 family protein	1.10017	0.169447		-1.04593	0.413182		-1.2354	0.000836026
EF1405	thioredoxin	1.02935	0.752111		1.16756	0.0971531		1.08234	0.116319
EF1406	excinuclease ABC, subunit C	-1.07985	NA		1.03378	0.68297		1.21095	0.146176
EF1407	hypothetical protein	1.35743	0.00412656		1.07809	0.380041		-1.17072	0.0342846
EF1408	ABC transporter, ATP-binding protein	-1.28623	0.00450452		-1.03179	0.643816		-1.31264	3.2136e-05
EF1409	conserved hypothetical protein	-1.33724	0.000454748		-1.03743	0.385761		-1.33357	3.5629e-05
EF1410	sugar-binding transcriptional regulator, LacI family	-1.05242	0.667613		-1.15323	NA		-1.01341	0.895461
EF1411	glycosyl hydrolase, family 4	1.07458	0.619443		1.07911	0.372298		1.10331	0.282114
EF1412	conserved domain protein	1.19867	0.028751		1.35656	0.181396		1.94679	8.23274e-07
EF1413	msrC protein, putative	1.15935	0.297868		1.03508	0.71632		-1.01249	0.876176
EF1414	conserved hypothetical protein	-1.06471	0.360712		-1.05375	0.266897		-1.17059	0.00266593
EF1415	glutamate dehydrogenase	1.08565	0.193328		-1.05014	0.371017		1.15009	NA
EF1416	glucose-6-phosphate isomerase	1.1667	0.114018		-1.00407	0.946633		1.04973	0.265679
EF1417	site-specific recombinase, phage integrase family	-1.14053	0.0615602		1.14277	0.0175863		-1.26114	0.000393304
EF1418	hypothetical protein	1.03125	0.779196		1.08049	NA		-1.21663	0.00523415
EF1419	conserved hypothetical protein	1.05825	0.318294		1.10816	0.0804214		1.18258	0.00788695
EF1420	hypothetical protein	1.04273	0.466156		1.07661	0.130005		1.08351	0.0901043
EF1421	conserved hypothetical protein	-1.22562	0.216263		1.02673	0.586092		1.12058	0.084547
EF1422	transcriptional regulator, Cro/CI family	-1.01966	0.722575		1.01381	0.885905		1.21674	0.0143217
EF1423	transcriptional regulator, Cro/CI family	-1.36675	0.016017		2.02	0.00121575		1.17861	0.300648
EF1424	hypothetical protein	-1.5355	0.00484129		1.53085	NA		1.34275	0.109643
EF1425	hypothetical protein	-1.16164	NA		2.02222	1.88282e-08		1.02605	0.7525
EF1426	vrlI protein, putative	-1.67377	NA		1.84429	1.24305e-06		1.09762	0.265184
EF1427	hypothetical protein	-1.26989	NA		1.1981	NA		-1.18754	0.188306
EF1428	hypothetical protein	-2.61894	NA		1.86773	2.18893e-06		1.01824	0.836446
EF1429	hypothetical protein	-1.23853	0.204487		2.02187	3.08277e-05		1.18662	0.11395
EF1430	conserved hypothetical protein	-1.2287	0.196585		1.85346	NA		-1.0102	0.912118
EF1431	hypothetical protein	-1.23195	0.191798		1.98208	1.92369e-06		1.15095	0.0912457
EF1432	hypothetical protein	-1.33306	NA		1.94554	2.09078e-07		1.05686	0.515797
EF1433	conserved hypothetical protein	-1.2687	0.0362074		1.42839	0.000146862		1.21312	0.00706598
EF1434	DnaD domain protein	-1.77968	0.000719467		1.93337	NA		1.14804	0.450971
EF1435	recombination protein U, putative	1.82814	NA		2.1224	NA		-1.23807	NA
EF1436	hypothetical protein	-1.72022	NA		1.87361	2.76046e-06		1.167	0.126755
EF1437	hypothetical protein	-1.53579	NA		1.48635	0.00286661		1.03391	0.686725
EF1438	hypothetical protein	-1.25716	0.353052		1.68864	0.000292891		1.13427	0.127322
EF1439	hypothetical protein	-1.15818	NA		2.00579	NA		1.13289	0.252736
EF1440	conserved hypothetical protein TIGR01671	-1.24656	0.0444257		1.68807	1.40553e-05		1.08322	0.32253
EF1441	hypothetical protein	-1.18819	0.0413972		1.80393	4.94457e-08		1.11227	0.214286
EF1442	DNA topoisomerase domain protein	-1.25319	0.32579		1.50254	2.20993e-05		1.10297	0.517134
EF1443	conserved hypothetical protein	-1.13236	0.365893		1.5191	0.000592275		-1.04766	0.587755
EF1444	conserved hypothetical protein	-1.25485	0.0123596		1.63132	NA		-1.18138	0.227349
EF1445	replicase domain protein	-1.32929	0.00705891		1.50412	NA		-1.149	0.105809
EF1446	hypothetical protein	-1.29109	0.00635106		1.46304	0.0132497		1.00481	0.945008
EF1447	conserved hypothetical protein	-1.15729	0.153225		1.91501	3.29735e-07		-1.03613	0.670082
EF1448	hypothetical protein	-1.66711	0.00236227		1.77331	9.73544e-07		1.0914	0.472419
EF1449	conserved hypothetical protein	-1.27769	0.136149		1.55421	NA		1.21846	0.0334822
EF1450	positive control factor, putative	-1.13264	NA		2.4914	NA		1.27288	NA
EF1451	conserved domain protein	-1.62778	NA		1.4498	NA		1.63632	NA
EF1452	adenine methyltransferase, putative	1.63949	NA		1.29166	NA		1.08771	NA
EF1453	conserved hypothetical protein	-1.30848	NA		1.58182	NA		-1.22572	NA
EF1454	terminase, small subunit, internal deletion	-2.26556	NA		1.58412	NA		1.21715	NA
EF1455	terminase, large subunit, putative	1.12047	NA		1.17697	0.0040528		1.12173	0.304442
EF1456	conserved hypothetical protein TIGR01555	-1.4589	NA		1.7958	NA		1.22819	NA
EF1457	minor head protein	1.39891	NA		1.32556	NA		1.17168	NA
EF1458	hypothetical protein	-2.30002	NA		1.57188	NA		-1.03075	NA
EF1459	conserved hypothetical protein	1.30942	NA		1.8278	0.000730221		1.01562	NA
EF1460	LysM domain protein	1.12607	NA		1.7004	NA		1.38186	NA
EF1461	conserved hypothetical protein	-1.36925	NA		1.51077	NA		1.10571	NA
EF1462	conserved hypothetical protein	1.46952	NA		1.40086	NA		-1.21437	NA
EF1463	hypothetical protein	1.50244	NA		1.25197	NA		1.93462	NA
EF1464	conserved hypothetical protein	1.09929	NA		1.38371	0.00389239		1.14413	NA
EF1465	conserved hypothetical protein	-1.10116	NA		1.09147	NA		1.70813	NA
EF1466	conserved hypothetical protein	-1.47982	NA		1.32837	0.0158153		1.40827	NA
EF1467	conserved hypothetical protein	-1.15594	NA		1.20819	NA		1.36498	NA
EF1468	conserved hypothetical protein	1.27186	NA		-1.02656	NA		1.80949	NA
EF1469	conserved hypothetical protein	1.14025	NA		1.09415	0.507911		1.36001	NA
EF1470	conserved hypothetical protein	1.85349	NA		1.33878	NA		1.12155	NA
EF1471	conserved hypothetical protein	-1.28391	NA		1.27127	NA		1.18247	0.289945
EF1472	conserved hypothetical protein	-1.64233	NA		1.36253	NA		1.40746	NA
EF1473	conserved hypothetical protein	1.43362	NA		1.32991	NA		2.7146	NA
EF1474	LysM domain protein	1.16931	NA		1.12453	NA		1.27427	NA
EF1475	conserved hypothetical protein	1.01992	NA		1.13158	0.213494		-1.37066	NA
EF1476	conserved hypothetical protein	1.05831	NA		1.03768	0.742935		1.68892	NA
EF1477	conserved hypothetical protein	1.26223	NA		1.08806	0.53186		2.62677	NA
EF1478	conserved hypothetical protein	1.34198	0.128987		1.28424	0.0144065		1.15264	NA
EF1479	conserved hypothetical protein	1.87351	NA		1.24592	0.122201		1.22902	NA
EF1480	conserved hypothetical protein	1.07467	NA		1.63127	0.00343607		1.29627	NA
EF1481	hypothetical protein	1.23913	NA		1.36596	NA		1.75038	NA
EF1482	hypothetical protein	-1.6613	NA		-1.65452	0.0728766		-1.02271	NA
EF1483	conserved hypothetical protein	-1.33374	NA		1.18424	NA		1.22023	NA
EF1484	conserved hypothetical protein	-1.19745	NA		1.27542	0.156224		1.15271	NA
EF1485	conserved hypothetical protein	1.02117	NA		1.29742	NA		-1.03115	NA
EF1486	endolysin	-1.0851	NA		1.44209	NA		1.90892	NA
EF1487	hypothetical protein	1.02393	0.77382		1.11241	0.0238947		1.07643	NA
EF1488	hypothetical protein	1.14953	0.127923		1.11411	0.107587		1.01891	0.718
EF1489	hypothetical protein	-1.3254	0.00204309		1.79626	5.71816e-06		1.04371	0.424397
EF1490	hypothetical protein	1.08446	0.310178		1.16551	0.238803		1.10687	NA
EF1491	nrdI family protein	1.19413	0.0134096		-1.06906	0.204501		1.05461	0.328753
EF1492	V-type ATPase, subunit F	-1.03259	0.59487		-1.04113	0.424033		1.87626	5.47851e-12
EF1493	V-type ATPase, subunit I	-1.03788	0.681915		-1.09233	0.109695		1.90532	1.7656e-09
EF1494	V-type ATPase, subunit K	-1.2335	0.0156873		-1.04058	0.456816		1.87706	2.32081e-08
EF1495	V-type ATPase, subunit E	-1.18849	0.0346939		-1.06631	0.137329		1.85646	5.71941e-09
EF1496	V-type ATPase, subunit C	-1.23004	0.035909		-1.15232	0.00496258		1.78823	4.27319e-09
EF1497	V-type ATPase, subunit G	-1.16825	0.0228759		-1.09425	0.104934		1.71582	1.00103e-09
EF1498	V-type ATPase, subunit A	-1.18304	0.0379393		-1.10048	0.069146		1.7989	8.34677e-11
EF1499	V-type ATPase, subunit B	-1.09068	0.228602		-1.02016	0.701535		1.86467	2.22177e-11
EF1500	V-type ATPase, subunit D	-1.11271	0.300139		1.0181	0.705135		1.90697	1.49621e-09
EF1501	hypothetical protein	-1.13205	0.296778		-1.01059	0.86215		1.90602	5.73445e-10
EF1502	beta-lactamase, putative	1.15802	0.412627		1.03789	0.491042		-1.08976	0.0818745
EF1503	fructose-1,6-bisphosphatase, putative	1.35378	0.0762461		-1.07948	0.387029		-1.30775	0.000113359
EF1504	diaminopimelate decarboxylase	1.726	0.00432511		1.04848	0.623959		1.00852	0.888834
EF1505	conserved hypothetical protein	1.40511	0.000225693		-1.02155	0.690369		1.16485	0.00138415
EF1506	hypothetical protein	-1.189	NA		-1.23985	0.13439		-1.1879	NA
EF1507	hypothetical protein	-1.04551	NA		1.0298	NA		1.06222	0.484229
EF1508	hypothetical protein	-1.03294	NA		1.03584	0.609884		1.157	0.0434728
EF1509	conserved hypothetical protein	1.22584	NA		1.1638	0.0836779		1.03575	0.649732
EF1510	conserved hypothetical protein	-1.00334	0.962291		1.05056	0.625435		1.15488	0.0271779
EF1511	mandelate racemase/muconate lactonizing enzyme family protein	-1.1782	NA		-1.0028	0.982154		1.13452	0.25266
EF1512	conserved hypothetical protein	1.00505	NA		-1.24721	0.0687445		-1.1296	NA
EF1513	pheromone binding protein	1.24338	NA		-1.27544	NA		-1.21594	0.149418
EF1515	transcription antiterminator, bglG family	-1.75823	0.0171693		-1.03914	NA		-1.12429	0.0503763
EF1516	PTS system, IIABC components	-1.6254	0.0244124		1.16319	0.0259394		1.01008	0.864658
EF1517	hypothetical protein	1.2722	NA		-1.01478	0.82083		1.32756	NA
EF1518	conserved hypothetical protein	1.3735	0.000516026		1.07528	0.257798		1.29988	0.000211337
EF1519	cation-transporting ATPase, E1-E2 family	-1.11667	0.0898745		1.06101	0.461388		-1.11552	0.0267012
EF1521	DNA primase	1.1472	0.105205		-1.07182	0.166567		1.2466	0.000219737
EF1522	RNA polymerase sigma-43 factor	1.01372	0.87761		-1.03629	0.449644		1.00051	0.990729
EF1523	conserved domainl protein	-1.11887	0.12017		1.15556	0.00328429		1.07234	0.338697
EF1524	conserved hypothetical protein	-1.02715	0.623809		1.00126	0.978355		-1.02525	0.481665
EF1525	transcriptional regulator, Fur family	-1.26796	0.00101502		-1.17084	0.0416875		1.02844	0.560433
EF1526	glyceraldehyde 3-phosphate dehydrogenase	1.43641	2.84234e-05		-1.15129	0.00963031		1.47556	0.000265937
EF1527	GTP-binding protein	1.00114	0.983529		1.30162	0.0726892		1.14084	0.00621416
EF1528	hypothetical protein	1.04769	0.660939		1.19475	0.204339		-1.16077	0.0369449
EF1529	PTS system, IIC component, putative	1.01912	0.819765		1.34735	0.36341		-1.19997	0.026695
EF1531	transcriptional regulator, TetR family	-1.29189	0.0950901		-1.17483	NA		-1.3338	0.00910158
EF1532	hypothetical protein	1.70671	0.0506803		1.05414	0.549429		-1.25937	0.0416123
EF1533	conserved hypothetical protein	1.96226	1.65474e-06		1.01038	0.873387		2.4181	4.63425e-10
EF1534	peptidyl-prolyl cis-trans isomerase, cyclophilin-type	-1.085	0.151363		-1.0707	0.149231		1.0103	0.833165
EF1535	conserved hypothetical protein	1.13701	0.149311		-1.02701	NA		-1.34463	0.000616708
EF1536	conserved hypothetical protein	-1.07395	0.360713		-1.04371	0.415579		1.01264	0.79496
EF1537	integrase/recombinase XerD, putative	-1.01579	0.816541		-1.0313	0.50622		-1.06096	0.194995
EF1538	conserved hypothetical protein	-1.03965	0.512921		1.1184	0.0304997		-1.12532	0.00487073
EF1539	conserved hypothetical protein TIGR00281	-1.04801	0.471198		1.08739	0.115636		-1.04679	0.2552
EF1541	conserved hypothetical protein	-1.31612	0.000334108		-1.02263	0.618394		-3.17213	2.20934e-12
EF1542	conserved hypothetical protein	1.13719	0.292844		1.07389	0.483556		-1.23376	0.000160088
EF1543	ferredoxin	-1.02749	0.758033		1.07054	0.257639		1.17192	0.0347945
EF1544	conserved hypothetical protein	1.21586	0.181045		-1.24937	0.00615143		1.03624	0.546093
EF1545	ATP-dependent DNA helicase RecQ	-1.02413	0.785733		-1.26472	NA		1.00862	0.894339
EF1546	LysM domain protein	1.15909	0.0454484		1.15743	0.0217881		-1.01002	0.83875
EF1547	cytidylate kinase	-1.43355	0.022643		1.05326	0.366877		1.00673	NA
EF1548	ribosomal protein S1	1.1889	0.00713073		1.10278	0.0898927		-1.03141	0.42945
EF1549	GTPase, putative	-1.0686	0.333798		1.21434	0.0029636		-1.05075	0.217262
EF1550	DNA-binding protein HU	1.11989	0.149639		1.36637	0.000727154		1.21752	0.00610871
EF1551	hypothetical protein	1.79695	NA		1.26192	0.0402439		1.12277	0.411946
EF1552	hypothetical protein	1.19812	0.010016		-1.08501	0.103887		-1.00604	0.883398
EF1553	TPR domain protein	1.32347	0.00148838		1.03754	0.438655		-1.06505	0.119203
EF1554	conserved hypothetical protein	1.08685	0.457028		-1.00981	0.829799		1.09756	0.0208271
EF1555	YitT family protein	1.08689	0.226279		-1.0188	0.788825		-1.06193	0.242854
EF1556	conserved hypothetical protein	-1.03083	0.617421		-1.17556	0.0237073		-1.11167	0.0192619
EF1557	dihydrodipicolinate reductase	1.01493	0.790138		-1.16038	0.0122938		-1.15621	0.00335221
EF1558	poly A polymerase	1.01019	0.861935		-1.10347	0.0482038		-1.11714	0.0141614
EF1559	conserved hypothetical protein	-1.04648	0.415493		-1.1504	0.0206808		-1.1637	0.00370159
EF1560	hypothetical protein	-1.06166	0.627316		-1.01318	0.898126		1.20475	0.00684036
EF1561	shikimate 5-dehydrogenase	1.61741	0.00696015		-1.24566	0.00149811		1.08717	0.0701929
EF1562	phospho-2-dehydro-3-deoxyheptonate aldolase, putative	1.33227	0.195158		-1.04835	0.433122		1.12577	0.0329371
EF1563	3-dehydroquinate synthase	1.0271	0.888067		-1.11096	0.0572035		1.10271	0.13668
EF1564	chorismate synthase	1.0913	0.708584		-1.1648	0.0247986		1.06984	0.140867
EF1565	prephenate dehydrogenase	1.07905	0.708323		-1.15186	0.0195817		1.06605	0.148603
EF1566	3-phosphoshikimate 1-carboxyvinyltransferase	1.04018	0.842852		-1.09265	0.10026		1.01611	0.732962
EF1567	shikimate kinase	-1.00856	0.965332		-1.04753	0.42369		1.12201	0.0546377
EF1568	prephenate dehydratase	-1.07707	0.694584		-1.0242	0.690191		1.09583	0.151151
EF1569	transcriptional regulator, PSR protein	-1.05016	0.473971		1.07831	0.240316		1.21551	NA
EF1570	DegV family protein	1.01897	0.725711		-1.01307	0.835884		1.13508	0.0203296
EF1571	hypothetical protein	-1.20668	0.0106667		1.04485	0.424499		-1.10676	0.0531068
EF1572	hypothetical protein	-1.09359	0.131916		1.02679	0.648729		-1.13277	0.0176755
EF1573	hypothetical protein	1.19935	0.0593609		1.17295	0.0180592		1.07019	0.176131
EF1574	Na+/H+ antiporter, putaive	1.09348	0.236968		1.10378	0.127437		1.07085	0.0959591
EF1575	ABC transporter, ATP-binding protein	1.05423	0.565435		-1.01383	0.839582		1.01455	0.796761
EF1576	thymidylate synthase	1.09971	0.140844		1.0112	0.84537		-1.06629	0.198731
EF1577	dihydrofolate reductase	1.05345	0.331255		-1.04713	0.377018		-1.08272	0.105892
EF1578	iron-sulfur cluster-binding protein, putative	1.13023	0.0353318		-1.0952	0.135629		-1.08047	0.10712
EF1579	transcriptional repressor LexA	-1.25166	0.00229948		1.02332	0.832281		-1.04255	0.34605
EF1580	conserved hypothetical protein	-1.03618	0.598927		-1.03497	0.614859		-1.23422	3.65703e-05
EF1582	major facilitator family transporter	-1.1516	0.128175		1.07078	0.332676		-1.28158	0.105249
EF1583	N-acetylmuramoyl-L-alanine amidase, family 4	1.04	0.695568		1.11921	0.062572		1.21781	0.00285884
EF1584	cysteine synthase A	1.35641	0.000925118		1.05988	0.349505		-1.12766	0.0372477
EF1585	transcriptional regulator, Fur family	1.29058	0.00131325		1.11204	0.191321		1.11503	0.045023
EF1586	NADH oxidase	1.48509	2.33508e-05		1.21023	0.014561		1.12521	0.0133924
EF1587	MutT/nudix family protein	1.20138	0.0162325		-1.10763	0.140412		1.13228	0.0155143
EF1589	acetyltransferase, GNAT family	1.16518	0.116817		1.23394	0.0290308		1.05348	0.640289
EF1590	protease synthase and sporulation negative regulatory protein pai 1	-1.16842	0.314965		1.15783	0.059966		1.25789	0.00898443
EF1591	transcriptional regulator, AraC family	1.21246	0.0147491		-1.13723	0.234611		-1.34245	0.00130019
EF1592	ABC transporter, ATP-binding/permease protein	-1.75803	NA		-1.10751	0.330948		1.05186	NA
EF1593	ABC transporter, ATP-binding/permease protein	-1.48582	NA		-1.06471	0.531127		1.11212	0.488617
EF1594	hypothetical protein	-1.0869	NA		1.23475	0.0558979		-1.01374	NA
EF1595	MutT/nudix family protein	1.28648	NA		-1.0494	0.499599		1.09814	0.670616
EF1596	lipoprotein, putative	-1.49397	0.000575953		1.11097	0.0718502		-1.46429	7.64177e-07
EF1597	catalase/peroxidase	1.23456	0.0386442		1.11774	0.106832		-1.50278	4.58626e-06
EF1598	deoxyribodipyrimidine photolyase	1.60092	0.00140479		1.10368	0.138427		1.01197	0.84624
EF1599	TPR domain transcriptional regulator, Cro/CI family	-1.01515	0.849012		1.22391	0.00403533		1.21601	0.0892372
EF1601	PTS system, IIABC components	1.07658	NA		-1.04828	0.566505		-1.46667	NA
EF1602	glycosyl hydrolase, family 13	-1.67902	0.0492109		1.18591	0.0696256		-1.79895	NA
EF1603	sucrose-6-phosphate dehydrogenase	1.19599	0.234642		1.03294	0.763806		-1.48163	0.00148234
EF1604	sucrose operon repressor ScrR	1.13115	0.105001		1.06845	0.270794		1.13822	0.0285353
EF1605	hypothetical protein	1.24645	0.340717		1.29405	0.0175938		1.14111	NA
EF1606	glycosyl hydrolase, family 1	1.05875	0.500346		-1.04337	0.500775		-1.18863	0.00482792
EF1608	cardiolipin synthetase, putative	1.20258	0.00467607		1.0919	0.328516		-1.11277	0.0328693
EF1609	conserved hypothetical protein	1.18415	0.0482998		1.07088	0.201398		1.37724	0.000361306
EF1610	conserved domain protein	1.08535	0.56651		-1.40459	0.00344907		-1.58887	0.0216928
EF1611	inorganic pyrophosphatase, manganese-dependent	1.22146	NA		-1.09433	NA		-1.04367	NA
EF1612	pyruvate formate-lyase activating enzyme	-1.15836	0.0335223		-1.06481	0.312925		-1.06667	0.192958
EF1613	formate acetyltransferase	1.01629	NA		1.34555	NA		-1.52181	NA
EF1614	DNA topoisomerase IV, A subunit	-1.0455	NA		1.15835	NA		-1.26153	NA
EF1615	DNA topoisomerase IV, B subunit	1.10587	NA		1.07292	NA		-1.12632	NA
EF1616	CoA-binding domain protein	-1.01797	0.859851		1.12497	0.0743926		-1.1215	0.189735
EF1617	conserved hypothetical protein	1.19243	NA		-1.67234	NA		-2.12547	NA
EF1618	ethanolamine utilization protein EutH	1	NA		-1.17057	NA		1.0588	0.77374
EF1619	carbon dioxide concentrating mechanism protein CcmL, putative	-1.31875	NA		-1.08163	NA		-1.31615	NA
EF1620	hypothetical protein	1.00385	NA		1.36897	NA		-1.21982	NA
EF1621	conserved hypothetical protein	-1.71523	NA		1.08465	NA		-2.53723	NA
EF1622	conserved domain protein	1.17003	NA		-1.08924	NA		-1.39105	NA
EF1623	microcompartment protein	1.4302	0.0479437		-1.23282	NA		-1.24016	0.322368
EF1624	aldehyde dehydrogenase, putative	1.6819	NA		1.07325	NA		-2.03316	NA
EF1625	microcompartment protein family	-1.43249	NA		-1.17559	NA		-1.10795	NA
EF1626	ethanolamine utilization protein EutL	-1.06141	NA		-1.15256	NA		-1.57897	NA
EF1627	ethanolamine ammonia-lyase small subunit	-1.25607	NA		-1.05227	NA		-4.30128	NA
EF1629	ethanolamine ammonia-lyase large subunit	1.07602	0.775193		1.08491	0.72691		1.51877	0.160035
EF1632	sensor histidine kinase	-1.64403	NA		-1.01896	0.873374		-1.05822	0.507626
EF1633	response regulator	-1.7415	NA		-1.39278	NA		-2.15059	NA
EF1634	propanediol utilization protein PduU	-1.23767	0.113786		-1.14065	0.417677		1.01874	0.910291
EF1635	propanol dehydrogenase PduQ, putative	-1.5685	NA		-1.60663	NA		-1.83938	NA
EF1637	ATP:cob(I)alamin adenosyltransferase, putative	-1.02344	0.847515		1.02897	NA		-1.48968	0.118768
EF1638	ethanolamine utilization protein, EutP	-1.0791	NA		-1.42785	NA		-1.26508	NA
EF1639	iron compound ABC transporter, ATP-binding protein	-2.16499	NA		-1.06708	NA		1.28006	NA
EF1640	iron compound ABC transporter, permease protein	-1.31164	NA		-1.30421	NA		1.01472	NA
EF1641	iron compound ABC transporter, iron compound-binding protein	-1.82674	NA		-1.11635	NA		-2.62057	NA
EF1643	conserved hypothetical protein TIGR00023	-1.00606	0.937024		1.13169	0.0599667		1.27326	0.00368785
EF1644	lacX protein, putative	1.05619	NA		-1.31669	NA		-1.10531	NA
EF1645	transcriptional regulator CodY	1.47032	NA		1.06446	0.707836		1.34136	0.175758
EF1646	heat shock protein HslVU, ATPase subunit HslU	1.06823	NA		-1.50398	NA		-1.21724	NA
EF1647	heat shock protein HslV	-1.30073	NA		-1.10884	NA		-1.19559	NA
EF1648	site-specific recombinase, phage integrase family	-1.2713	NA		-1.07521	NA		-1.79857	NA
EF1649	glucose-inhibited division protein	1.08073	NA		-1.09171	NA		-1.71964	NA
EF1650	DNA topoisomerase I	-1.27119	NA		-1.19055	NA		-1.00122	NA
EF1651	abortive infection protein	1.01121	NA		1.13218	NA		-1.0451	NA
EF1652	DNA processing protein DprA, putative	-1.05984	NA		1.0913	NA		-1.51599	NA
EF1653	ribonuclease HII	-1.38216	0.00139451		1.09536	0.228055		-1.1967	0.00685082
EF1654	GTPase of unknown function	-1.68917	NA		-1.03973	NA		-1.15524	NA
EF1655	2-dehydropantoate 2-reductase, putative	-1.02038	NA		-1.13721	NA		-3.73342	NA
EF1656	transcriptional regulator, LysR family	1.14298	NA		1.12333	NA		-1.92079	NA
EF1657	membrane protein, putative	-1.28139	NA		-1.38832	NA		-1.88611	NA
EF1658	branched-chain alpha-keto acid, E2, dihydrolipoamide acetyltransferase	1.19091	NA		-1.06801	NA		-1.89913	NA
EF1659	branched-chain alpha-keto acid dehydrogenase, E1 beta subunit	-4.05693	NA		2.47843	NA		1.18628	NA
EF1660	branched-chain alpha-keto acid dehydrogenase, E1 alpha subunit	-2.14939	NA		-1.28227	NA		-3.3389	NA
EF1661	branched-chain alpha-keto acid dehydrogenase, E3	1.02997	NA		1.05882	NA		-1.11618	NA
EF1662	butyrate kinase	1.48995	NA		1.02284	NA		-1.24327	NA
EF1663	branched-chain phosphotransacylase	-1.00933	NA		1.04924	NA		-1.33978	NA
EF1664	conserved hypothetical protein	1.24316	0.00880544		-1.02409	0.756549		1.1028	0.0918885
EF1665	conserved hypothetical protein	-1.25174	NA		1.0208	NA		1.18539	NA
EF1666	hypothetical protein	-1.41879	NA		1.38659	NA		-1.37078	NA
EF1667	short chain dehydrogenase family protein	1.17393	NA		1.12159	0.408307		1.05571	0.460754
EF1668	transcriptional regulator, MarR family	1.03665	NA		1.16004	0.0947696		-1.1016	NA
EF1669	glyoxylase family protein	1.10135	0.49881		1.11867	0.198157		-1.51608	0.0139314
EF1670	phospholipase/carboxylesterase family protein	1.17467	0.053755		1.04543	0.510712		-1.20631	0.0177262
EF1671	oxidoreductase, zinc-binding	1.19733	NA		1.16178	NA		1.53282	NA
EF1672	permease protein, putative	1.6157	NA		1.03952	NA		2.81708	NA
EF1673	ABC transporter, ATP-binding protein	1.50792	0.000110751		-1.07997	0.267521		3.32823	6.85991e-09
EF1674	hypothetical protein	1.01676	0.862807		-1.0171	0.857385		11.0968	1.67089e-12
EF1675	ABC transporter, ATP-binding protein	-1.33822	NA		1.10799	NA		5.90801	NA
EF1676	transcriptional regulator, GntR family	-1.37248	0.106403		-1.01848	0.83796		9.41362	1.50824e-06
EF1677	lipoprotein, putative	1.03597	NA		-1.05096	NA		-1.06326	NA
EF1678	signal peptidase I	-1.02814	0.773569		-1.20996	0.0962685		-1.24929	0.207389
EF1679	carboxyl-terminal protease	-1.14715	NA		-1.15271	NA		-1.17377	NA
EF1680	conserved hypothetical protein	1.02795	0.74478		1.10987	0.0961364		-1.01122	0.794814
EF1681	peptide methionine sulfoxide reductase	1.09431	NA		1.00952	NA		-1.37178	NA
EF1682	conserved hypothetical protein	-1.58813	NA		-1.02116	NA		-1.52654	NA
EF1683	Lipase/Acylhydrolase, putative	-1.15695	0.194512		-1.00181	NA		-1.21407	0.0122484
EF1684	DegV family protein, putative	-1.68138	NA		1.12646	NA		-1.14172	NA
EF1685	hemolysin III	1.26355	0.00315954		1.02472	0.666823		1.26184	0.00369618
EF1686	hypothetical protein	-1.20971	NA		1.3731	0.0255026		1.30811	0.0424269
EF1687	adenine phosphoribosyltransferase	-1.30924	0.000940205		1.13788	0.205888		-1.01775	0.843154
EF1688	single-stranded-DNA-specific exonuclease RecJ	1.06592	NA		-1.12018	NA		-1.31402	NA
EF1689	hypothetical protein	-1.11271	0.247225		-1.06673	0.26211		-1.24596	0.00314321
EF1690	oxidoreductase, short-chain dehydrogenase/reductase family	-1.04721	NA		-1.00618	NA		-1.34685	NA
EF1691	metallo-beta-lactamase, AtsA/ElaC family	1.01931	0.844197		-1.23092	0.0886822		-1.1954	0.0619496
EF1692	conserved hypothetical protein	1.43329	NA		1.01173	NA		-1.18903	NA
EF1693	KH domain protein	-1.71497	3.19087e-05		-1.02222	0.764472		1.16217	0.0416759
EF1694	ribosomal protein S16	-1.7157	NA		1.04008	NA		1.18942	NA
EF1695	acetyltransferase, GNAT family	-1.15731	0.33723		-1.04626	0.594473		-1.22799	0.0216451
EF1698	NADPH-dependent FMN reductase domain protein	1.00679	0.908458		1.04253	0.457316		1.49203	1.44831e-07
EF1699	transcriptional regulator, MerR family	-1.45272	0.00178014		-1.08758	NA		-1.13273	0.342671
EF1700	signal recognition particle protein	-1.08541	0.145122		1.05617	0.305312		-1.10756	0.0229193
EF1701	conserved hypothetical protein	-1.09067	NA		-1.5598	NA		-1.12352	NA
EF1702	conserved hypothetical protein	-1.15076	NA		-1.30265	NA		1.29855	NA
EF1703	alkaline phosphatase synthesis transcr regulatory protein PhoP	1.18232	0.0147079		-1.07276	0.268584		1.09268	0.180649
EF1704	sensory box histidine kinase	1.05272	0.287916		-1.04469	0.318202		-1.20787	0.00160297
EF1705	phosphate-binding protein	-1.05671	NA		-1.12606	NA		-1.13611	NA
EF1706	aminotransferase, class I	-1.19441	NA		-1.68902	NA		-1.7033	NA
EF1707	glycosyl hydrolase, family 38	-1.3508	NA		-1.62783	NA		-1.60194	NA
EF1708	conserved hypothetical protein	-1.0453	NA		-1.8315	NA		-1.48014	NA
EF1709	sugar-binding transcriptional regulator, GntR family	-1.00185	0.982124		1.0229	0.743146		-1.15485	0.0326369
EF1710	transcriptional regulator, LysR family	2.0013	NA		-1.15111	NA		1.23496	NA
EF1711	carbonic anhydrase, putative	1.27349	NA		2.7543	NA		1.09024	NA
EF1712	orotate phosphoribosyltransferase	4.90135	NA		1.10077	NA		-1.69493	NA
EF1713	orotidine 5`-phosphate decarboxylase	6.6338	NA		-1.67499	NA		-1.42326	NA
EF1714	dihydroorotate dehydrogenase	5.94972	NA		-1.57578	NA		-1.94096	NA
EF1715	dihydroorotate dehydrogenase electron transfer subunit	6.43596	NA		-1.08785	NA		-2.15165	NA
EF1716	carbamoyl-phosphate synthase, large subunit	5.25034	NA		-1.66188	NA		-1.77831	NA
EF1717	carbamoyl-phosphate synthase, small subunit	6.82963	NA		-1.05061	NA		-1.9821	NA
EF1718	dihydroorotase	4.45916	0.00102808		1.30112	0.0812823		-2.30051	7.60161e-09
EF1719	aspartate carbamoyltransferase	3.30834	NA		1.25989	NA		-2.74584	NA
EF1720	uracil permease	3.29637	NA		1.04324	NA		-3.4956	NA
EF1721	pyrimidine operon regulatory protein PyrR	1.41196	NA		1.14988	NA		-3.2024	NA
EF1723	signal peptidase II	-1.2908	NA		-1.18596	NA		-1.06776	NA
EF1724	CBS domain protein	2.85163	NA		#VALUE!	NA		#VALUE!	NA
EF1725	formate--tetrahydrofolate ligase	1.03399	NA		-1.41624	NA		1.05702	NA
EF1726	cold-shock domain family protein	1.07207	0.53625		1.05335	NA		1.13631	0.10297
EF1727	ebsA protein	1.273	NA		-1.24641	NA		1.33381	NA
EF1728	EbsB protein	-1.04807	0.529427		-1.00105	0.988436		-1.08222	0.243952
EF1730	EbsC protein	1.13221	0.123206		-1.12571	0.064731		-1.14346	0.0916444
EF1731	3-dehydroquinate dehydratase, type I	-1.18949	NA		-1.10138	NA		-1.14998	NA
EF1732	ABC transporter, ATP-binding/permease protein, MDR family	-1.11605	NA		-1.13728	0.287418		-1.50157	0.0124075
EF1733	ABC transporter, ATP-binding/permease protein, MDR family	-1.45928	NA		-1.24182	NA		-1.88657	NA
EF1734	conserved hypothetical protein	1.05939	0.520698		-1.42045	0.086671		-1.34667	0.0290738
EF1735	hypothetical protein	1.08887	NA		-1.24646	NA		-1.22166	NA
EF1736	endonuclease IV	1.29263	0.00128752		-1.04475	0.444447		-1.15865	0.0221473
EF1737	hypothetical protein	1.3428	NA		-1.01113	NA		-1.10343	NA
EF1738	conserved hypothetical protein	1.09847	0.266307		1.06212	0.302057		-1.0453	0.559368
EF1739	tyrosyl-tRNA synthetase	1.1699	NA		-1.13924	NA		-1.04822	NA
EF1740	penicillin-binding protein 1B, putative	1.06615	0.481704		-1.04601	0.424391		1.10945	0.0678746
EF1741	catabolite control protein A	-1.34195	0.00051022		-1.09218	0.241736		-1.07885	0.163482
EF1743	proline dipeptidase	1.0393	0.706894		-1.04739	0.485343		1.01373	0.786909
EF1744	general stress protein, putative	1.30559	NA		-1.13199	NA		-1.09845	NA
EF1745	conserved hypothetical protein	1.3915	NA		1.0033	NA		-1.02315	NA
EF1746	UTP-glucose-1-phosphate uridylyltransferase	-1.10932	0.255043		-1.08827	0.203017		-1.30492	0.00068759
EF1747	glycerol-3-phosphate dehydrogenase (NAD(P)+)	NA	NA		NA	NA		NA	NA
EF1748	prolipoprotein diacylglyceryl transferase	1.08491	NA		-1.12501	NA		-1.10987	NA
EF1749	HPr(Ser) serine kinase/phosphatase	1.12636	0.137273		-1.07712	0.235394		1.00374	0.946049
EF1750	endo/excinuclease amino terminal domain protein	-1.05147	0.476293		-1.0707	NA		1.2002	0.00358509
EF1751	membrane protein, putative	1.37412	NA		-1.12288	NA		1.7935	NA
EF1752	conserved hypothetical protein	1.79885	9.7764e-07		-1.11213	0.0582795		1.92596	2.66883e-09
EF1753	conserved hypothetical protein	1.43453	NA		1.0803	NA		1.92079	NA
EF1754	PhoU family protein	-1.10068	0.244745		-1.06841	0.265326		-1.04696	0.376906
EF1755	phosphate ABC transporter, ATP-binding protein	1.0624	NA		-1.11679	NA		-1.19075	NA
EF1756	phosphate ABC transporter, ATP-binding protein	-1.07611	0.352344		-1.04305	0.49473		-1.15337	0.0121195
EF1757	phosphate ABC transporter, permease protein	-1.07847	NA		-1.37879	NA		-1.64728	NA
EF1758	phosphate ABC transporter, permease protein	-1.25611	NA		-1.51302	NA		-1.03271	NA
EF1759	phosphate ABC transporter, phosphate-binding protein	1.63574	NA		#VALUE!	NA		-1.01885	NA
EF1760	cell division ABC transporter, permease protein FtsX, putative	1.12501	NA		-1.20024	NA		-1.44339	NA
EF1761	cell division ATP-binding protein FtsE	-1.02159	NA		1.04929	NA		-1.05414	NA
EF1763	preprotein translocase, SecA subunit	-1.00426	NA		1.00464	NA		-1.07311	NA
EF1764	ribosomal subunit interface protein	1.14015	0.0944458		1.04391	0.51684		1.01216	0.77561
EF1765	competence protein F	-1.62945	NA		1.35944	NA		-1.22386	NA
EF1767	competence protein F	-1.9315	0.0342255		-1.57217	0.0273771		-1.57729	0.0137151
EF1768	ABC transporter, ATP-binding protein	1.34727	0.00487132		1.14021	0.0186443		1.34829	0.00123743
EF1769	PTS system, IIB component, putative	-1.17442	NA		-1.00758	NA		-1.18314	NA
EF1770	hypothetical protein	-1.45992	NA		-1.17098	NA		-2.44063	NA
EF1771	conserved hypothetical protein TIGR00257	-1.03475	0.631164		1.08506	0.149106		1.21253	0.0235217
EF1772	conserved hypothetical protein	-1.05941	0.335177		1.11221	0.0508979		1.19876	0.00295978
EF1773	short chain dehydrogenase	-1.11513	NA		-1.03064	0.640471		-1.1915	0.00665927
EF1774	conserved hypothetical protein	1.48899	1.73657e-05		1.20903	0.0757967		1.20497	0.000829173
EF1775	hypothetical protein	-1.02169	NA		-1.5469	NA		1.62831	NA
EF1776	conserved domain protein	3.64558	NA		#VALUE!	NA		2.01345	NA
EF1777	phosphoribosylamine--glycine ligase	1.15349	NA		1.01147	NA		-1.18684	NA
EF1778	phosphoribosylaminoimidazolecarboxamide formyltransferase	-1.41364	NA		-1.23253	NA		-1.10442	NA
EF1779	phosphoribosylglycinamide formyltransferase	-1.63959	0.124525		-1.70738	0.008331		-1.8797	0.00578702
EF1780	phosphoribosylformylglycinamidine cyclo-ligase	-1.27174	NA		-1.06038	NA		-2.23374	NA
EF1781	amidophosphoribosyltransferase	1.15473	NA		-1.41755	NA		-3.03915	NA
EF1782	phosphoribosylformylglycinamidine synthase II	1.13908	NA		1.16968	NA		-1.28081	NA
EF1783	phosphoribosylformylglycinamidine synthetase I	-2.09125	NA		-1.34777	NA		-1.73938	NA
EF1784	phosphoribosylformylglycinamidine synthase, PurS protein	1.28481	NA		-1.15268	NA		1.74709	NA
EF1785	phosphoribosylaminoimidazole-succinocarboxamide synthase	1.12967	NA		-1.51984	NA		-2.04658	NA
EF1786	phosphoribosylaminoimidazole carboxylase, ATPase subunit	1.03923	NA		-1.05142	NA		-1.09965	NA
EF1787	phosphoribosylaminoimidazole carboxylase, catalytic subunit	1.79581	NA		1.22415	NA		-1.51924	NA
EF1789	SPFH domain/Band 7 family protein	1.20343	NA		-1.04533	NA		-1.16405	NA
EF1790	YjeF-related protein	1.19576	0.0111309		-1.1271	0.125056		-1.12238	0.032844
EF1791	pheromone binding protein	-1.35913	0.0578561		-1.21106	NA		-1.31836	0.0171928
EF1792	conserved hypothetical protein	-1.30187	NA		-1.10583	NA		-1.61877	NA
EF1793	branched-chain amino acid aminotransferase	1.2209	0.0334805		1.03988	0.559944		1.15557	0.0404243
EF1794	conserved hypothetical protein	-1.09909	NA		-1.103	NA		-1.28326	NA
EF1796	lipoprotein, putative	1.37669	4.5947e-05		1.06643	0.182314		1.51355	1.78071e-05
EF1797	conserved hypothetical protein	1.06903	0.297178		1.04175	0.700995		-1.05776	0.377678
EF1798	hypothetical protein	-1.30853	NA		1.25429	NA		-1.17199	NA
EF1800	conserved hypothetical protein	-1.33216	NA		1.11814	NA		1.16276	NA
EF1801	PTS system, IIA component	-1.17635	NA		-2.36828	NA		-1.17233	NA
EF1802	PTS system, IID component	1.08148	0.454683		-1.18525	0.0554514		-1.81434	0.000607692
EF1803	PTS system, IIC component	1.21374	NA		-1.43454	NA		-1.8134	NA
EF1804	PTS system, IIB component	1.35347	0.00501116		1.24732	NA		-1.11592	0.345576
EF1805	glycosyl hydrolase, family 35	-1.3636	NA		1.07637	NA		-1.38723	NA
EF1806	tagatose-6-phosphate kinase	-1.4334	NA		1.11333	NA		-3.2279	NA
EF1807	tagatose 1,6-diphosphate aldolase	1.10843	0.521081		1.02685	NA		-1.42595	0.00126443
EF1808	agaS protein	-1.51237	NA		-1.6536	NA		-1.74929	NA
EF1809	transcriptional regulator, GntR family	-1.02987	0.812122		-1.14266	0.299565		-1.86528	0.00849204
EF1810	general stress protein A	1.23045	NA		-1.1467	NA		-1.93198	NA
EF1811	general stress protein A	1.5191	0.0639885		1.02681	NA		-1.25465	0.10696
EF1812	hypothetical protein	1.71428	NA		-1.29932	NA		-1.8843	NA
EF1813	sulfatase domain protein	1.07899	NA		-1.53182	0.0910287		-1.27104	NA
EF1814	drug resistance transporter, EmrB/QacA family protein	1.29754	NA		1.48766	NA		-1.68848	NA
EF1815	transcriptional regulator, LysR family, putative	1.01788	0.903023		-1.1638	NA		1.42037	0.0295203
EF1816	conserved hypothetical protein	1.04316	0.605324		1.02084	0.839471		1.01374	0.848139
EF1817	serine proteinase, V8 family	1.26496	NA		1.20215	0.265836		1.41803	0.0912322
EF1818	coccolysin	1.07135	0.437566		1.00255	0.987606		1.51724	0.0142425
EF1820	histidine kinase, putative	1.296	NA		1.55925	NA		2.2314	NA
EF1821	agrBfs protein	1.70346	NA		1.08011	NA		1.61756	NA
EF1822	response regulator	-1.05322	NA		-1.23256	NA		-1.12434	NA
EF1823	N-acetylmuramoyl-L-alanine amidase, family 4	-1.22774	NA		1.40767	NA		-1.31362	NA
EF1824	glycosyl hydrolase, family 31/fibronectin type III domain protein	1.17646	NA		-1.79066	0.0708553		-1.0952	NA
EF1825	conserved domain protein	-1.19794	0.0606651		-1.61998	0.0521993		1.19809	0.0460277
EF1826	alcohol dehydrogenase, zinc-containing	-1.33182	NA		-1.57078	NA		1.07315	NA
EF1827	conserved hypothetical protein	1.13849	NA		-1.07255	NA		-1.19795	NA
EF1828	glycerol uptake facilitator protein, putative	-1.26755	NA		-1.1145	NA		2.3582	NA
EF1829	PTS system, IID component	-1.07278	NA		-1.19327	NA		-1.11086	NA
EF1830	PTS system, IIC component	-2.27222	NA		-1.30232	NA		-1.27131	NA
EF1833	hypothetical protein	1.28267	0.0256978		1.02096	0.843006		1.07927	0.439953
EF1834	galactose-6-phosphate isomerase, LacB subunit	1.03158	NA		-1.72881	NA		-1.4562	NA
EF1835	galactose-6-phosphate isomerase, LacA subunit	1.54792	NA		-1.98586	NA		-1.34027	NA
EF1836	PTS system, IIA component, putative	1.19271	NA		1.02639	NA		-1.31177	NA
EF1837	PTS system, IIB component, putative	-1.03885	NA		-1.13508	NA		-1.46266	NA
EF1838	PTS system, IIC component	1.1644	NA		1.00182	NA		-1.60102	NA
EF1839	lactose phosphotransferase system repressor LacR	1.26735	NA		-1.71999	NA		-1.34426	NA
EF1841	HD domain protein	1.10786	NA		-1.78747	NA		-1.23	NA
EF1843	polysaccharide deacetylase family protein	-1.07418	NA		-1.14442	NA		-1.3681	NA
EF1844	hypothetical protein	-1.12573	NA		-1.85651	NA		-1.24723	NA
EF1846	hypothetical protein	-1.05307	NA		-1.65025	NA		#VALUE!	NA
EF1847	site-specific recombinase, phage integrase family	1.02017	NA		-1.5795	NA		-1.10099	NA
EF1848	hypothetical protein	1.2968	NA		-1.62784	NA		-1.67309	NA
EF1849	conserved hypothetical protein	1.03608	NA		1.05432	NA		1.27669	NA
EF1850	conserved hypothetical protein	1.72519	NA		-2.56777	NA		1.24153	NA
EF1851	glycosyl hydrolase, family 35	1.15145	0.384517		-1.58627	0.00646169		-1.19192	0.0661866
EF1853	hypothetical protein	1.37068	0.000855937		-1.207	NA		1.42846	0.00141625
EF1855	transposase, IS256 family	-1.29173	NA		-1.38288	NA		-1.12074	NA
EF1858	aspartate 1-decarboxylase	1.46895	NA		1.21058	NA		1.07541	NA
EF1859	pantoate--beta-alanine ligase	1.20846	NA		1.01181	NA		1.10672	NA
EF1860	3-methyl-2-oxobutanoate hydroxymethyltransferase	-1.38228	NA		1.09435	NA		-1.04924	NA
EF1861	conserved domain protein	-1.14023	NA		-1.10464	NA		-1.02167	NA
EF1863	sensor histidine kinase	-1.07173	0.427842		-1.01967	0.853755		-1.11867	0.341334
EF1864	DNA-binding response regulator	-1.47851	NA		-1.40752	NA		-1.0563	NA
EF1867	permease, putative	-1.0013	0.989396		1.02581	0.748582		-1.07262	0.630601
EF1868	ABC transporter, ATP-binding protein	-1.2367	NA		-1.15927	NA		1.10966	NA
EF1869	permease, putative	-1.04265	NA		-1.28018	0.137296		-1.04873	0.779197
EF1871	thioredoxin family protein	-1.098	NA		-1.27179	NA		-1.46787	NA
EF1872	conserved domain protein	-1.02651	NA		1.11558	0.504055		-1.02026	0.85274
EF1874	transposase, IS256 family	1.18515	0.0826971		1.00595	NA		1.21884	0.0830267
EF1875	conserved hypothetical protein	-1.36977	NA		-1.95146	NA		-4.6647	NA
EF1876	lipoprotein, NLP/P60 family	-1.64542	NA		-1.27308	NA		-3.84744	NA
EF1877	membrane protein, putative	1.02965	NA		1.0714	NA		-1.16651	NA
EF1878	ATP/GTP-binding protein, putative	-1.08965	NA		-1.32268	NA		-1.44318	NA
EF1879	conserved hypothetical protein	-1.39438	NA		-1.23409	NA		-1.41507	NA
EF1880	hypothetical protein	-1.91721	0.0684675		1.06611	0.539636		-1.01807	NA
EF1881	conserved domain protein	1.07155	NA		-1.23502	NA		1.1122	NA
EF1882	conserved hypothetical protein	-1.08067	NA		-1.2724	0.065854		-2.24943	NA
EF1883	conserved hypothetical protein	-1.10939	NA		-1.05342	NA		-1.57966	NA
EF1884	transposase, IS116/IS110/IS902 family	1.04081	NA		-1.01275	NA		1.02111	NA
EF1885	hypothetical protein	-1.0506	0.716007		-1.27818	0.116881		-1.14923	0.400511
EF1886	transcriptional regulator, Cro/CI family	-1.08432	NA		1.01822	NA		-1.10052	NA
EF1887	conserved hypothetical protein	-1.45812	0.0125829		-1.16119	NA		-1.77809	0.0377403
EF1888	hypothetical protein	1.34652	NA		-1.09705	NA		-1.10527	NA
EF1889	conserved domain protein	-1.16061	0.384078		-1.05831	0.350391		-1.05491	0.441769
EF1890	conserved domain protein	-1.24225	NA		-1.11264	NA		1.09709	NA
EF1892	FtsK/SpoIIIE family protein	-1.06035	0.57047		-1.14579	0.106136		1.11976	0.116687
EF1893	hypothetical protein	-1.05555	NA		-1.57808	NA		-1.88425	NA
EF1894	conserved hypothetical protein	-1.17044	NA		1.488	NA		-1.15461	NA
EF1895	conserved hypothetical protein	3.9392	NA		#VALUE!	NA		43.6108	NA
EF1896	cell wall surface anchor family protein	-1.35011	NA		-1.74709	NA		-1.42723	NA
EF1897	hypothetical protein	-1.31711	NA		1.05984	NA		1.40428	NA
EF1898	ribosomal protein L19	1.03477	NA		1.17348	NA		1.05739	NA
EF1899	tRNA (guanine-N1)-methyltransferase	1.02758	NA		1.02219	NA		-1.21819	NA
EF1900	16S rRNA processing protein RimM	1.008	NA		1.08851	NA		1.4119	NA
EF1901	Mn2+/Fe2+ transporter, NRAMP family	3.08029	NA		-1.96055	NA		-1.37262	NA
EF1902	glyoxylase family protein	1.3812	0.00026294		-1.01436	0.836222		1.27476	9.93679e-05
EF1903	conserved hypothetical protein	1.3183	0.0054365		-1.06733	0.222599		1.70711	3.81686e-09
EF1904	glycerophosphoryl diester phosphodiesterase family protein	1.33895	0.000519571		-1.05563	0.488736		1.46018	3.91483e-06
EF1906	conserved hypothetical protein	1.06787	0.241086		-1.10661	0.0581233		1.08707	0.0600429
EF1907	maoC family protein	1.17105	0.0109648		-1.03022	0.564793		1.09722	0.0292117
EF1908	UDP-N-acetylmuramate--alanine ligase	-1.09309	NA		1.251	NA		2.23603	NA
EF1909	hypothetical protein	1.33292	0.00164502		-1.00911	0.920321		-1.29676	0.02527
EF1910	conserved hypothetical protein	-1.17264	NA		-1.59669	NA		-1.33786	NA
EF1911	conserved hypothetical protein	1.08788	0.16789		-1.10922	0.0652264		1.01746	0.724616
EF1912	ROK family protein	1.46715	NA		-1.23922	NA		-1.42041	NA
EF1913	conserved hypothetical protein TIGR00278	1.06597	NA		-1.34085	NA		-1.33737	NA
EF1914	hypothetical protein	1.10703	0.220865		1.17756	0.0567321		-1.01464	0.8331
EF1915	hypothetical protein	1.11315	0.205836		1.07808	0.158462		-1.01029	0.886344
EF1916	GTP-binding protein	-1.19005	NA		1.02461	NA		-1.16003	NA
EF1917	ATP-dependent Clp protease, ATP-binding subunit ClpX	-1.23394	NA		-1.03698	NA		1.33132	NA
EF1918	conserved hypothetical protein	1.22892	0.00192209		-1.0107	0.851052		1.09517	0.096265
EF1919	acetyltransferase, GNAT family	-1.41636	NA		-1.05709	NA		-2.06972	NA
EF1920	C4-dicarboxylate anaerobic carrier	1.18467	NA		-1.35429	NA		-1.86912	NA
EF1921	inosine-uridine preferring nucleoside hydrolase	-1.24796	NA		-1.2846	NA		-2.17364	NA
EF1922	transcriptional regulator, LacI/carbohydrate kinase, PfkB	1.07156	0.423822		-1.02667	NA		-1.0828	0.251313
EF1923	hypothetical protein	1.0684	0.423626		1.07263	0.378834		1.2933	0.019485
EF1925	hypothetical protein	-1.53739	NA		1.09653	NA		-1.09306	NA
EF1926	conserved hypothetical protein	-1.15585	NA		1.31619	NA		1.06347	NA
EF1927	glycerol uptake facilitator protein	1.05513	0.629866		-1.17236	0.211438		-2.28479	NA
EF1928	alpha-glycerophosphate oxidase	-1.1219	NA		1.05064	NA		-1.44607	NA
EF1929	glycerol kinase	1.23502	NA		1.24123	NA		-2.04852	NA
EF1931	conserved hypothetical protein	-1.12804	NA		1.00946	NA		-1.07964	NA
EF1932	oxidoreductase, pyridine nucleotide-disulfide family	-1.23216	0.0671771		1.02528	0.829149		-1.05688	0.642076
EF1933	hypothetical protein	1.02727	0.634099		1.00438	0.926326		-1.07789	0.116823
EF1934	conserved domain protein	-1.05208	0.679369		1.09236	0.388338		1.0168	0.785159
EF1935	hypothetical protein	1.18332	NA		-1.213	NA		-2.08195	NA
EF1936	hypothetical protein	-1.03013	NA		-1.01207	NA		1.09064	NA
EF1937	conserved hypothetical protein	-1.63313	0.000325364		-1.03798	0.804903		-1.33138	0.0332578
EF1938	cation-transporting ATPase, E1-E2 family	1.03344	NA		1.10323	NA		-1.0528	NA
EF1939	conserved hypothetical protein	-1.03885	0.567183		-1.17259	0.103122		-1.60997	0.000516198
EF1940	cyclic AMP receptor protein, putative	1.21365	0.0162795		1.00551	0.947155		-1.15143	0.0933722
EF1941	hypothetical protein	1.24504	0.00389608		1.06928	0.431443		1.34362	0.000176588
EF1943	drug resistance transporter, Bcr/CflA family protein	1.22298	0.00500818		1.03739	0.505246		1.37716	8.02502e-05
EF1944	hypothetical protein	-1.0748	0.303457		1.05661	0.306554		1.02639	0.633656
EF1945	membrane protein, putative	-1.12614	NA		-1.25727	NA		1.85679	NA
EF1946	hypothetical protein	1.04237	0.531106		-1.09097	0.301998		1.09981	0.021366
EF1947	hypothetical protein	1.02829	0.688009		-1.00496	0.955968		1.20689	0.000119527
EF1948	conserved hypothetical protein	1.09232	0.343333		1.12813	0.168916		1.16435	0.0876654
EF1949	conserved hypothetical protein	1.22384	0.117559		-1.00239	0.979437		-1.25128	0.0519246
EF1950	mocD family protein, putative	-1.04918	NA		-1.43443	0.0232734		-2.40273	0.00332472
EF1951	phosphosugar-binding protein	1.0205	NA		-1.66644	NA		-1.63345	NA
EF1952	PTS system, IID component	1.13283	NA		-1.12456	NA		-1.17141	NA
EF1953	PTS system, IIC component	-1.18092	NA		-1.017	0.858096		-1.05748	NA
EF1955	sigma-54 dependent DNA-binding response regulator	-1.91061	NA		1.03578	NA		-1.51765	NA
EF1956	hypothetical protein	-4.25501	NA		1.23409	NA		-1.99213	NA
EF1958	deoxyguanosinetriphosphate triphosphohydrolase, putative	-1.01625	NA		-1.27663	NA		-1.32067	NA
EF1959	conserved domain protein	1.20572	0.0522391		-1.03283	0.609956		1.19147	0.00722722
EF1961	enolase	1.22937	NA		1.10806	NA		1.26105	NA
EF1962	triosephosphate isomerase	1.52496	NA		-1.03187	NA		1.12743	NA
EF1963	phosphoglycerate kinase	1.02859	0.72564		-1.07218	0.347729		1.15677	0.0489588
EF1964	glyceraldehyde 3-phosphate dehydrogenases	1.10787	0.154004		-1.06001	0.601267		1.18164	0.180644
EF1965	transcriptional regulator, SorC family	-1.27432	NA		-1.09372	NA		1.11295	NA
EF1966	YitT family protein	-1.01276	0.895424		-1.12601	0.203933		-1.05175	0.608429
EF1967	conserved hypothetical protein	-1.11716	NA		-1.04144	NA		-1.20061	NA
EF1968	conserved hypothetical protein	-1.05246	NA		-1.17911	NA		-1.14678	NA
EF1969	phosphomethylpyrimidine kinase, putative	-1.13206	NA		-1.34157	NA		-1.19499	NA
EF1970	aspartyl-tRNA synthetase	-3.01324	NA		1.05698	NA		-1.1234	NA
EF1971	histidyl-tRNA synthetase	-1.0926	NA		-1.09987	NA		-1.05896	NA
EF1972	hypothetical protein	-1.30857	NA		-1.19847	NA		1.05812	NA
EF1973	conserved hypothetical protein TIGR00256	-1.45551	NA		-1.09413	NA		-1.06619	NA
EF1974	GTP pyrophosphokinase	-1.45653	NA		1.63758	NA		1.13783	NA
EF1975	conserved hypothetical protein TIGR00046	-1.18859	0.0546278		-1.08064	0.197841		-1.11812	0.0107029
EF1976	ribosomal protein L11 methyltransferase	1.3725	NA		-1.47925	NA		-1.07888	NA
EF1977	conserved hypothetical protein	1.19714	NA		-1.29323	NA		-1.12008	NA
EF1978	DNA-3-methyladenine glycosylase	1.09881	NA		-1.64792	NA		1.28067	NA
EF1979	ATPase, AAA family	-1.00027	0.997639		1.01898	0.722691		-1.24686	0.00306796
EF1980	hypothetical protein	-1.37972	NA		1.10762	0.143058		1.03478	0.675363
EF1981	hypothetical protein	1.09975	0.141479		1.016	0.852663		-1.18919	NA
EF1982	universal stress protein family	1.635	0.000490981		-1.05562	0.616679		-1.20157	NA
EF1983	acetate kinase	1.10674	NA		-1.04236	NA		3.84615	NA
EF1985	hypothetical protein	2.81944	NA		-1.8022	NA		#VALUE!	NA
EF1986	competence protein	1.6566	NA		2.30565	NA		-1.64482	NA
EF1987	hypothetical protein	-1.7595	NA		-1.25896	NA		1.13667	NA
EF1988	hypothetical protein	1.03819	NA		-1.01409	0.904692		1.05461	NA
EF1989	ferrochelatase	1.24461	NA		1.00564	NA		-1.12467	NA
EF1990	hypothetical protein	-1.47644	NA		-1.41855	NA		-2.33648	NA
EF1991	cold shock protein CspC	2.81488	NA		-1.01164	NA		-1.74394	NA
EF1992	endolysin	-1.75106	NA		-1.02013	NA		-1.35508	NA
EF1993	holin	-1.48213	NA		-1.93115	NA		1.0395	NA
EF1994	conserved hypothetical protein	-2.16361	NA		-2.74477	NA		-1.13534	NA
EF1995	hypothetical protein	-3.89786	NA		-1.09536	NA		-1.0952	NA
EF2001	minor structural protein	-1.07347	NA		-2.11782	NA		-1.90986	NA
EF2002	tail protein, putative	-1.31061	NA		-1.60978	NA		-2.69725	NA
EF2003	tape measure protein, putative	-1.61394	NA		-1.55898	NA		-1.84042	NA
EF2004	conserved domain protein	-1.60646	NA		-1.76967	NA		-1.86997	NA
EF2005	major tail protein, putative	-1.34283	NA		-1.3132	NA		-1.34561	0.309379
EF2006	hypothetical protein	-1.49363	NA		-1.40232	NA		1.01988	NA
EF2007	hypothetical protein	1.27623	NA		1.87062	NA		-1.38913	NA
EF2008	ribosomal protein L23, putative	1.9255	NA		1.9717	NA		-2.18896	NA
EF2010	hypothetical protein	-1.35504	NA		-1.26221	NA		1.05343	NA
EF2011	hypothetical protein	-2.57389	NA		-3.10706	NA		-2.45897	NA
EF2012	conserved hypothetical protein	-1.18562	NA		1.02073	NA		-1.39371	NA
EF2013	hypothetical protein	-1.24554	0.337224		-1.88592	0.0192651		-2.51465	0.00594601
EF2014	coenzyme F420 hydrogenase domain protein	1.01217	NA		-1.03346	NA		-1.20947	NA
EF2015	minor head protein, putative	-1.4969	NA		-1.83616	NA		-2.45188	NA
EF2016	portal protein	-1.11274	NA		-1.42227	NA		-1.3446	NA
EF2017	terminase, large subunit, putative	-1.18874	NA		1.21802	NA		-1.21439	0.190525
EF2018	conserved hypothetical protein	-1.39115	0.0751676		1.01787	0.891061		-1.00722	0.973293
EF2019	hypothetical protein	1.01109	0.888848		1.02463	0.875314		-1.12941	0.148671
EF2020	hypothetical protein	-1.93429	NA		-1.73041	NA		-2.18099	NA
EF2021	hypothetical protein	-1.25084	NA		-1.30097	NA		1.05474	NA
EF2022	conserved domain protein	-1.11926	NA		-1.05809	NA		-1.01305	NA
EF2023	hypothetical protein	-1.03629	0.771351		-1.2717	0.192045		-1.34278	0.0288257
EF2024	transcriptional regulator, ArpU family	-1.05098	NA		-1.62226	NA		-2.63156	NA
EF2025	hypothetical protein	1.04734	NA		-1.30389	NA		-1.59874	NA
EF2027	conserved hypothetical protein	1.0583	NA		-1.05765	NA		-1.56659	NA
EF2028	hypothetical protein	-2.68425	NA		-1.91834	NA		-2.03248	NA
EF2031	conserved hypothetical protein	1.85536	NA		2.3925	NA		-1.02425	NA
EF2032	hypothetical protein	-1.3462	NA		-1.16481	NA		-3.09958	NA
EF2033	hypothetical protein	1.0188	NA		-1.10014	NA		-1.91831	NA
EF2034	hypothetical protein	-1.73654	NA		1.03289	NA		-1.57603	NA
EF2036	hypothetical protein	1.99485	NA		1.14314	NA		1.04394	NA
EF2037	antirepressor, putative	-2.03064	NA		1.52386	NA		-1.3888	NA
EF2038	hypothetical protein	-3.14371	NA		-1.36998	NA		-1.57809	NA
EF2039	conserved hypothetical protein	1.15675	NA		-1.56333	NA		1.24243	NA
EF2040	transcriptional regulator, Cro/CI family	-1.18881	0.0246092		1.01411	0.790495		-1.03352	0.514079
EF2041	hypothetical protein	-1.33057	0.00155337		-1.14366	0.0949723		-1.22684	0.00740151
EF2042	conserved domain protein	-1.20759	0.00627585		1.01659	0.742714		-1.08113	0.104728
EF2043	site-specific recombinase, phage integrase family	-1.22335	0.0144827		1.02178	0.742447		-1.16412	0.0259408
EF2044	competence protein	1.8686	NA		NA	NA		-5.98406	NA
EF2045	competence protein	5.05359	NA		-2.09439	NA		#VALUE!	NA
EF2046	competence protein	-2.07035	NA		1.57434	NA		-2.01942	NA
EF2047	amino acid permease family protein	-1.25633	NA		-1.13392	NA		1.07479	NA
EF2048	conserved hypothetical protein TIGR00048	-1.44358	NA		-1.23391	NA		1.58311	NA
EF2049	ABC transporter, permease protein, putative	-1.87246	0.00365096		-1.30209	0.00525192		1.33672	0.0733942
EF2050	ABC transporter, ATP-binding protein	-1.80585	NA		-1.19164	NA		-2.03221	NA
EF2051	transcriptional regulator, GntR family	1.25154	NA		-1.06707	NA		-1.72197	NA
EF2052	cell division protein, FtsK/SpoIIIE family	-1.04963	NA		1.21166	NA		1.01811	NA
EF2055	oxidoreductase, pyridine nucleotide-disulfide family	1.00483	NA		1.15355	NA		-1.00869	NA
EF2056	1,4-dihydroxy-2-naphthoate octaprenyltransferase, putative	-1.53829	NA		1.0751	NA		1.49552	NA
EF2057	heptaprenyl diphosphate synthase, component II, putative	1.24597	0.0375345		1.17278	0.112202		1.23464	0.0926713
EF2058	transport ATP-binding protein CydD, putative	-1.19311	0.0225384		-1.20131	0.0123085		1.0229	0.59167
EF2059	transport ATP-binding protein CydC, putative	-1.17673	0.0348542		-1.25375	0.0189331		-1.00184	0.96265
EF2060	cytochrome d ubiquinol oxidase, subunit II	-1.10285	0.089958		1.09198	0.324522		-1.07743	0.0850642
EF2061	cytochrome d ubiquinol oxidase, subunit I	-1.20785	0.00427758		-1.07264	0.427457		1.02558	0.634371
EF2062	hypothetical protein	1.0457	NA		1.03299	NA		-2.59713	NA
EF2063	transcriptional regulator, AraC family	3.47915	NA		NA	NA		NA	NA
EF2064	DNA topoisomerase III	-1.03449	NA		-1.06254	NA		-1.18677	NA
EF2065	conserved hypothetical protein	1.47932	NA		-1.22887	NA		1.40154	NA
EF2066	transcriptional regulator, TetR family	1.09825	0.347081		-1.28505	0.14555		-1.24347	0.342199
EF2067	conserved hypothetical protein TIGR00481	1.7549	NA		-1.234	0.00354123		1.2979	0.00201686
EF2068	multidrug resistance protein, putative	1.38223	0.00292689		-1.12526	0.0879716		1.32954	0.00363987
EF2069	hypothetical protein	1.06897	NA		-1.1748	NA		-1.55379	NA
EF2070	tRNA (5-methylaminomethyl-2-thiouridylate)-methyltransferase	1.16141	0.0510321		1.12953	0.0453806		-1.20836	0.00983967
EF2071	conserved hypothetical protein	1.49929	NA		1.08716	NA		-1.0428	NA
EF2072	aminotransferase, class V	1.37557	0.00400737		1.01625	0.748877		1.11166	0.0213932
EF2073	ribose-phosphate pyrophosphokinase	-1.06065	NA		-1.02035	NA		-1.15243	NA
EF2074	ABC transporter, ATP-binding protein	2.93934	4.7049e-12		-16.5831	1.20015e-13		-2.24162	5.47075e-06
EF2075	ABC transporter, permease protein	4.0967	1.36113e-13		-13.135	1.78267e-10		-2.00781	2.36043e-05
EF2076	endocarditis specific antigen	4.02183	2.92801e-11		-11.536	4.79172e-13		-2.03005	4.37541e-05
EF2077	ABC transporter, ATP-binding protein	-1.36411	0.0327459		1.00467	0.967781		-1.05814	0.411864
EF2078	hypothetical protein	1.21982	NA		-1.43459	NA		-1.345	NA
EF2079	peptidase, M20/M25/M40 family	1.11553	0.217169		-1.20612	0.0580156		-1.14312	0.488204
EF2080	lipoprotein, YaeC family	-1.12123	NA		-1.1774	NA		-2.23674	NA
EF2081	ABC transporter, permease protein	-1.33018	0.24344		-1.05918	NA		-1.89855	NA
EF2082	ABC transporter, ATP-binding protein	-1.56663	NA		-1.20119	NA		-1.97247	NA
EF2083	hypothetical protein	-1.45289	0.0285494		1.59599	NA		1.42073	0.016861
EF2084	hypothetical protein	-1.11091	0.732537		1.62476	7.69473e-05		-1.07317	0.18578
EF2085	conserved hypothetical protein	-1.3155	NA		1.3364	NA		1.9224	NA
EF2086	endolysin	-1.66199	0.000357683		1.49706	0.000157039		-1.16093	0.10327
EF2087	holin	-1.47689	NA		1.37803	NA		-1.52281	NA
EF2088	hypothetical protein	-1.41406	0.00068069		1.73907	3.05242e-06		-1.11306	0.269842
EF2089	hypothetical protein	1.27255	NA		1.0918	NA		-1.54784	NA
EF2090	hypothetical protein	-1.84544	0.000733015		1.27661	0.0752563		-1.21608	0.123547
EF2091	hypothetical protein	-1.13834	NA		1.08681	NA		1.27997	NA
EF2092	hypothetical protein	-1.49134	9.63353e-05		1.95122	2.97654e-06		-1.04695	0.5583
EF2093	endolysin domain protein	-1.06415	NA		1.4518	NA		-1.35299	NA
EF2094	hypothetical protein	-1.79974	4.81172e-05		1.67973	0.000182819		-1.08776	0.380188
EF2095	hypothetical protein	-1.87477	NA		1.18599	NA		1.57617	NA
EF2096	tail protein	-1.82067	0.000358191		1.86952	1.22879e-05		-1.07876	0.397172
EF2097	hypothetical protein	-1.27425	NA		5.93703	NA		2.75235	NA
EF2098	hypothetical protein	-1.50011	NA		1.48879	NA		-1.08821	NA
EF2099	hypothetical protein	-1.50102	NA		2.89498	NA		-1.1497	NA
EF2100	hypothetical protein	-1.02091	NA		1.78413	NA		-1.09897	NA
EF2101	hypothetical protein	-1.67499	NA		-1.07079	NA		-1.00451	NA
EF2102	hypothetical protein	-1.78485	6.72102e-06		1.05545	0.769238		-1.09255	0.377816
EF2103	hypothetical protein	-1.84524	NA		1.39722	NA		-1.04259	NA
EF2104	hypothetical protein	-2.11424	NA		1.32487	NA		-1.25641	NA
EF2105	hypothetical protein	-2.47229	NA		1.4722	NA		-1.14236	NA
EF2106	conserved domain protein	-1.35097	NA		2.30723	NA		-1.24692	NA
EF2107	hypothetical protein	-1.61694	NA		3.10507	NA		-1.10659	NA
EF2108	hypothetical protein	1.38031	NA		2.30205	NA		2.06113	NA
EF2109	conserved domain protein	-1.70731	NA		-1.15629	NA		1.04996	NA
EF2110	hypothetical protein	-1.20275	NA		1.13724	NA		-1.06437	NA
EF2111	hypothetical protein	-2.03023	NA		1.23644	NA		-1.06523	NA
EF2112	hypothetical protein	-1.74929	NA		1.13554	NA		-1.19858	NA
EF2113	conserved hypothetical protein	-1.57518	NA		1.36342	NA		-1.19925	NA
EF2114	adenine methyltransferase, putative	-1.42153	NA		1.22988	NA		-1.14666	NA
EF2115	transcriptional regulator, ArpU family	1.208	NA		1.21044	NA		2.42742	NA
EF2116	hypothetical protein	2.08983	NA		1.21202	NA		3.7109	NA
EF2117	conserved hypothetical protein	-1.70699	NA		3.59369	NA		-1.12138	NA
EF2118	conserved domain protein	-1.40872	NA		1.02987	NA		1.06411	NA
EF2119	hypothetical protein	-1.72745	NA		1.09886	NA		-1.12837	NA
EF2120	conserved hypothetical protein	-1.77188	NA		1.53613	NA		1.20521	NA
EF2121	hypothetical protein	-1.4657	NA		2.20568	7.43644e-08		1.05291	0.587165
EF2122	hypothetical protein	-2.67215	NA		2.19571	NA		1.08568	NA
EF2123	hypothetical protein	-1.70986	NA		2.27409	1.81631e-07		1.05486	0.394534
EF2124	methyltransferase, putative	-1.22558	NA		2.14628	1.84057e-08		-1.02239	0.712236
EF2125	hypothetical protein	-1.68012	8.70361e-06		2.25508	5.12401e-09		1.02854	0.621719
EF2126	hypothetical protein	-1.78979	1.59393e-06		2.12832	9.48468e-09		-1.01827	0.765609
EF2127	hypothetical protein	-1.48642	0.0114364		2.09497	1.37488e-07		1.16623	0.172704
EF2128	conserved hypothetical protein	-2.05202	NA		2.33021	6.80399e-08		-1.06535	0.424363
EF2129	DNA replication protein, putative	-1.78637	NA		2.12843	6.41036e-08		1.0682	0.251361
EF2130	DnaD domain protein	-1.24856	NA		2.00109	5.78349e-08		1.01467	0.805512
EF2131	conserved hypothetical protein	-1.91622	5.69719e-07		2.30039	3.98879e-09		-1.04345	0.523078
EF2132	recT protein, putative	-1.5755	0.0115972		2.27583	4.94275e-09		1.19263	0.117231
EF2133	hypothetical protein	-1.49214	NA		2.2028	2.11189e-08		1.0287	0.667003
EF2134	hypothetical protein	-1.81097	4.69976e-06		1.99816	3.73185e-07		1.00971	0.882269
EF2135	hypothetical protein	-1.80011	0.00903102		1.99427	6.71129e-07		1.02331	0.738793
EF2136	hypothetical protein	-1.50195	NA		2.08047	4.22013e-07		-1.01975	0.788885
EF2137	hypothetical protein	-1.63688	NA		2.00578	4.41218e-08		-1.15419	NA
EF2138	transcriptional regulator, Cro/CI family	-1.49409	0.00529584		2.18383	1.17696e-08		-1.00438	0.948999
EF2139	hypothetical protein	-2.7901	NA		1.96201	NA		-1.02353	0.736012
EF2140	conserved hypothetical protein	-2.0771	NA		2.1014	1.32635e-09		-1.13594	0.098396
EF2141	transcriptional regulator, Cro/CI family	-1.75655	NA		2.20399	3.01065e-08		-1.24904	0.0240107
EF2142	transcriptional regulator, Cro/CI family	1.02063	0.727682		1.10824	0.100457		-1.12057	0.00618084
EF2143	conserved hypothetical protein	-1.06232	0.339967		1.08531	0.265223		-1.01509	0.748925
EF2144	lipoprotein, putative	-1.21265	0.0082574		1.12113	0.0323255		-1.10296	0.0233615
EF2145	site-specific recombinase, phage integrase family	-1.25377	0.00398677		1.15637	0.0297405		-1.17387	0.00521005
EF2146	membrane protein, putative	1.02922	0.654048		-1.03602	0.553672		-1.05909	0.350209
EF2147	hypothetical protein	-1.12795	0.171017		1.12583	0.184482		-1.17548	0.0201308
EF2148	hypothetical protein	-1.35365	0.137388		1.04274	0.585769		-1.05021	0.410195
EF2149	hypothetical protein	1.02428	0.717113		1.03353	0.591437		-1.05037	0.284701
EF2150	FemAB family protein	1.02848	0.758834		1.04536	0.371576		1.05921	0.161086
EF2151	glucosamine--fructose-6-phosphate aminotransferase, isomerizing	1.21139	0.536534		-1.10506	0.18512		1.23997	0.00183458
EF2152	cobalt transport family protein	-1.59729	0.00546901		-1.03374	0.515271		1.14294	0.00585359
EF2153	ABC transporter, ATP-binding protein	-1.5722	0.00524339		1.02991	0.487005		1.15121	0.00299088
EF2154	conserved hypothetical protein	-1.50604	0.0035787		1.08405	0.21107		1.38709	0.000101492
EF2156	conserved hypothetical protein	1.00774	0.902135		-1.007	0.902463		-1.03267	0.577767
EF2157	conserved hypothetical protein TIGR00159	1.17585	0.0129984		-1.09684	0.0972131		1.07726	0.0622406
EF2158	pyruvate ferredoxin/flavodoxin oxidoreductase family protein	-1.0851	0.184065		-1.10992	0.0819314		-1.04621	0.343527
EF2159	glutamine synthetase, type I	1.89383	3.32306e-07		-1.17049	0.0679523		1.07035	0.282155
EF2160	regulatory protein GlnR	1.7265	3.3016e-06		-1.06865	0.459294		1.03677	0.479044
EF2161	GTP-binding protein	1.0771	0.183492		-1.01418	0.741139		-1.13222	0.00469739
EF2162	tRNA delta(2)-isopentenylpyrophosphate transferase	1.11187	0.138286		-1.04955	0.390617		-1.12625	0.0139668
EF2163	glycerophosphoryl diester phosphodiesterase, putative	1.25775	0.0125515		-1.05752	NA		-1.01457	0.784634
[truncated: 1,244 more rows]
